# Supplementary material for: Pre-harvest mango yield prediction using artificial neural networks based on leaf nutrient variability
Source: PeerJ. 2025 Sep 16;13:e20013. doi: 10.7717/peerj.20013 (PMC13348870; doi:10.7717/peerj.20013)
Supplement: Supplemental Information 1 [file peerj-13-20013-s001.xlsx]

## Sheet:  Curves-2
							.
							.
										.
										.

## Sheet: arranged
										Observed
		X1	X2	X3	X4	X5	X6	X7	X8	Yield		ton/ha	ton/ha
		N	P	K	Ca	Mg	Chla	Chlb	Carbohydrate	Yield		Yield	Yield
		%	%	%	%	%	mg/gFW	mg/gFW	%	ton/ha		observed	ANN		MAE	RMSE	MPA
3	0	1.98	0.37	0.98	2.7	0.79	1.92	1.28	24.64	8.10469		8.1	7.87688		0.223119	0.0497821	2.75456
7	0	1.9846	0.370298	0.977756	2.71852	0.788089	1.89765	1.29573	25.1479	7.9934		7.99	8.29291		0.302913	0.0917563	3.79115
12	0	1.6	0.22	0.81	2.21	0.48	1.49	0.84	14.72	5.69297		5.69	5.33154		0.358464	0.128496	6.29989
13	0	1.6	0.24	0.82	2.21	0.47	1.49	0.88	14.4	5.81813		5.82	5.9187		0.098701	0.00974189	1.69589
16	0	1.62	0.22	0.81	2.24	0.49	1.46	0.85	15.04	5.67656		5.68	5.74768		0.067684	0.00458112	1.19162
17	0	1.61	0.23	0.8	2.23	0.47	1.5	0.89	14.4	5.88938		5.89	5.68565		0.204349	0.0417585	3.46942
24	0	1.35	0.16	0.56	1.96	0.27	1.15	0.62	10.56	4.725		4.73	4.6857		0.044303	0.00196276	0.936638
31	0	1.9	0.34	0.94	2.62	0.75	1.85	1.24	23.68	7.63984		7.64	7.73881		0.09881	0.00976342	1.29332
32	0	1.92	0.33	0.95	2.65	0.76	1.86	1.21	23.68	7.59938		7.6	7.69371		0.093711	0.00878175	1.23304
41	0	1.83	0.32	0.93	2.57	0.72	1.76	1.15	21.44	7.4025		7.4	8.06542		0.665421	0.442785	8.99218
44	0	1.85	0.33	0.92	2.54	0.71	1.78	1.14	21.12	7.32422		7.32	7.01439		0.30561	0.0933975	4.175
46	0	1.75	0.28	0.92	2.41	0.62	1.69	1.05	18.56	6.72969		6.73	6.29602		0.43398	0.188339	6.44844
53	0	1.76	0.27	0.9	2.4	0.65	1.67	1.05	18.56	6.57281		6.57	7.12064		0.550638	0.303202	8.3811
66	0	1.69	0.26	0.85	2.29	0.58	1.56	0.96	16.64	6.23		6.23	6.61681		0.386805	0.149618	6.20875
72	0	1.68	0.26	0.85	2.3	0.59	1.59	0.98	16.64	6.23		6.23	6.43168		0.201676	0.0406732	3.23717
90	0	1.85	0.33	0.95	2.54	0.72	1.64	1.22	20.48	11.7628		11.76	11.6615		0.098465	0.00969536	0.837287
93	0	1.53	0.18	0.74	2.12	0.38	1.34	0.86	10.24	9.71425		9.71	9.78269		0.072685	0.00528311	0.748558
95	0	1.53	0.18	0.76	2.15	0.39	1.32	0.85	10.56	9.98006		9.98	9.49288		0.487117	0.237283	4.88093
102	0	1.31	0.13	0.46	1.93	0.21	1.15	0.63	6.4	8.26144		8.26	8.55572		0.295724	0.0874527	3.58019
107	0	1.31	0.13	0.46	1.93	0.21	1.15	0.63	6.4	8.26144		8.26	8.55572		0.295724	0.0874527	3.58019
108	0	1.3	0.12	0.45	1.92	0.21	1.14	0.62	6.4	8.26144		8.26	8.42174		0.161745	0.0261614	1.95817
113	0	1.74	0.29	0.93	2.45	0.66	1.58	1.14	18.56	11.5793		11.58	11.4897		0.090349	0.00816294	0.780216
116	0	1.74	0.29	0.93	2.45	0.66	1.58	1.14	18.24	11.6781		11.68	11.4956		0.184414	0.0340085	1.57889
119	0	1.72	0.26	0.9	2.36	0.63	1.51	1.08	15.68	11.0723		11.07	11.5312		0.461245	0.212747	4.16662
129	0	1.62	0.21	0.85	2.29	0.54	1.46	1.01	13.76	10.6393		10.64	10.4553		0.184658	0.0340986	1.73551
130	0	1.63	0.23	0.85	2.27	0.55	1.45	1	13.76	10.811		10.81	10.3857		0.424277	0.180011	3.92486		MAE	RMSE	MPA
140	0	1.44	0.17	0.69	2.06	0.32	1.28	0.76	8.96	9.43312		9.43	9.21455		0.215447	0.0464174	2.2847	Count	32	32	32
142	0	1.42	0.17	0.68	2.08	0.31	1.26	0.78	9.28	9.39503		9.4	9.13629		0.26371	0.069543	2.80543	Sun	8.457	3.11737	106.181
149	0	1.58	0.21	0.81	2.22	0.46	1.37	0.95	12.16	10.2607		10.26	10.1645		0.095548	0.00912942	0.931267		0.264281	0.312118	3.31817
155	0	1.38	0.13	0.56	2.01	0.28	1.22	0.69	7.36	9.01594		9.02	9.11309		0.093091	0.00866593	1.03205	R2	0.974633
156	0	1.39	0.15	0.57	2	0.28	1.23	0.69	7.04	8.855		8.86	9.35831		0.498306	0.248309	5.62422
160	0	1.39	0.15	0.57	2	0.28	1.23	0.69	7.04	8.855		8.86	9.35831		0.498306	0.248309	5.62422
1	1	1.99	0.35	0.98	2.73	0.78	1.89	1.3	24.96	8.14687		8.15	8.34614		0.196141	0.0384713	2.40664	Count	130	130	130
2	1	1.98	0.36	0.99	2.72	0.79	1.91	1.3	25.28	8.16563		8.17	8.26014		0.090144	0.00812594	1.10335	Sun	24.5257	7.45891	331.215
4	1	1.97	0.34	0.98	2.71	0.78	1.92	1.27	24.96	8.14625		8.15	7.78165		0.368351	0.135682	4.51964		0.188659	0.239533	2.54781
5	1	1.9747	0.35185	0.988819	2.70733	0.79405	1.90828	1.31093	25.1381	8.16935		8.17	8.30892		0.138916	0.0192977	1.70032	R2	0.989178
6	1	1.98437	0.361239	0.984374	2.69543	0.794064	1.91237	1.28537	24.7473	8.10299		8.1	8.08009		0.019906	0.000396249	0.245753
8	1	1.99151	0.339592	0.972336	2.6979	0.790544	1.91327	1.31266	24.2571	8.02677		8.03	8.03692		0.006921	4.79002e-05	0.0861893
9	1	1.97583	0.389802	0.972473	2.71597	0.801572	1.91099	1.27408	24.4632	8.16125		8.16	7.99923		0.160769	0.0258467	1.97021
10	1	1.55	0.21	0.82	2.18	0.49	1.48	0.85	14.4	5.8725		5.87	6.27978		0.409778	0.167918	6.98089
11	1	1.59	0.22	0.81	2.22	0.48	1.47	0.87	14.72	5.73062		5.73	6.05227		0.322265	0.103855	5.62417				Average Contr	ibution of	Input	Node on Outputs
14	1	1.56	0.23	0.82	2.18	0.49	1.47	0.85	14.4	5.8725		5.87	6.17295		0.302945	0.0917757	5.1609				Network Name:	Mango
15	1	1.57	0.21	0.81	2.22	0.47	1.48	0.87	14.4	5.89281		5.89	6.1333		0.243303	0.0591963	4.13078				Iterations:	100000
18	1	1.59	0.24	0.79	2.19	0.5	1.48	0.85	15.04	5.85156		5.85	5.27977		0.570227	0.325159	9.74747
19	1	1.32	0.17	0.57	1.98	0.28	1.16	0.61	10.24	4.83484		4.83	4.74789		0.08211	0.00674205	1.7				Output Node	Input Node	Pe	rcent Contribution
20	1	1.35	0.16	0.56	1.96	0.27	1.15	0.62	10.56	4.725		4.73	4.68569		0.044306	0.00196302	0.936702				1	N		4.44
21	1	1.35	0.16	0.55	1.94	0.26	1.13	0.61	9.92	4.66094		4.66	4.93108		0.271079	0.0734838	5.81715				1	P		6.53
22	1	1.32	0.15	0.55	1.94	0.26	1.14	0.62	10.24	4.77		4.77	4.9632		0.193202	0.037327	4.05036				1	Mg		15.8
23	1	1.32	0.17	0.57	1.98	0.28	1.16	0.61	10.24	4.83484		4.83	4.74789		0.08211	0.00674205	1.7				1	K		3.71
25	1	1.32	0.16	0.57	1.94	0.26	1.15	0.61	9.92	4.66094		4.66	5.10308		0.44308	0.19632	9.50815				1	Ca		14.08
26	1	1.33	0.17	0.55	1.95	0.29	1.14	0.61	10.24	4.77		4.77	4.67393		0.096066	0.00922868	2.01396				1	Chlorophyll a		19.2
27	1	1.35	0.18	0.58	1.97	0.28	1.15	0.62	10.56	4.725		4.73	4.65667		0.07333	0.00537729	1.55032				1	Chlorophyll b		21.4
28	1	1.92	0.34	0.96	2.64	0.75	1.85	1.22	23.36	7.76		7.76	7.8273		0.067295	0.00452862	0.867204				1	Total Carbohydrates Fraction		14.84
29	1	1.92	0.33	0.95	2.65	0.76	1.86	1.21	23.68	7.59938		7.6	7.6937		0.093704	0.00878044	1.23295
30	1	1.91	0.33	0.94	2.66	0.76	1.87	1.23	24	7.65938		7.66	7.58597		0.074026	0.00547985	0.966397
33	1	1.91	0.33	0.94	2.66	0.76	1.87	1.23	24	7.65938		7.66	7.58597		0.074026	0.00547985	0.966397
34	1	1.9	0.34	0.94	2.62	0.75	1.85	1.24	23.68	7.63984		7.64	7.73881		0.098807	0.00976282	1.29329
35	1	1.9	0.34	0.94	2.62	0.75	1.85	1.24	24	7.65938		7.66	7.78243		0.122431	0.0149893	1.59832
36	1	1.92	0.33	0.95	2.65	0.76	1.86	1.21	23.68	7.63984		7.64	7.6937		0.053704	0.00288412	0.702932
37	1	1.84	0.34	0.93	2.55	0.71	1.78	1.15	21.76	7.34312		7.34	7.36475		0.024752	0.000612662	0.337221
38	1	1.83	0.32	0.93	2.57	0.72	1.76	1.15	21.12	7.32422		7.32	8.02194		0.701943	0.492724	9.58939
39	1	1.85	0.33	0.92	2.54	0.71	1.78	1.14	21.44	7.4025		7.4	7.0803		0.319703	0.10221	4.32031
40	1	1.86	0.32	0.92	2.53	0.73	1.79	1.14	21.76	7.30438		7.3	7.27073		0.029267	0.000856557	0.400918
42	1	1.85	0.33	0.92	2.54	0.71	1.78	1.14	21.76	7.30438		7.3	7.14379		0.156207	0.0244006	2.13982
43	1	1.86	0.32	0.92	2.53	0.73	1.79	1.14	21.76	7.34312		7.34	7.27073		0.069267	0.00479792	0.943692
45	1	1.86	0.32	0.92	2.53	0.73	1.79	1.14	21.44	7.4025		7.4	7.20747		0.192533	0.037069	2.6018
47	1	1.77	0.3	0.9	2.43	0.64	1.67	1.03	18.88	6.67		6.67	6.53552		0.134483	0.0180857	2.01624
48	1	1.77	0.29	0.9	2.41	0.63	1.66	1.06	18.24	6.70922		6.71	6.94247		0.232475	0.0540446	3.46461
49	1	1.76	0.27	0.9	2.4	0.65	1.67	1.05	18.56	6.57281		6.57	7.12063		0.550633	0.303197	8.38102
50	1	1.75	0.28	0.92	2.41	0.62	1.69	1.05	18.56	6.72969		6.73	6.29602		0.43398	0.188339	6.44844
51	1	1.77	0.3	0.9	2.43	0.64	1.67	1.03	18.88	6.67		6.67	6.53552		0.134483	0.0180857	2.01624
52	1	1.77	0.29	0.9	2.41	0.63	1.66	1.06	18.24	6.70922		6.71	6.94247		0.232475	0.0540446	3.46461
54	1	1.77	0.29	0.9	2.41	0.63	1.66	1.06	18.88	6.67		6.67	6.98141		0.311406	0.0969737	4.66876
55	1	1.55	0.2	0.76	2.15	0.42	1.36	0.79	13.12	5.4925		5.49	5.95754		0.467536	0.21859	8.51614
56	1	1.54	0.19	0.75	2.14	0.42	1.37	0.77	13.76	5.47188		5.47	5.24371		0.226291	0.0512076	4.13695
57	1	1.53	0.19	0.74	2.12	0.41	1.36	0.77	13.12	5.58156		5.58	5.53662		0.043375	0.00188139	0.77733
58	1	1.55	0.18	0.74	2.14	0.41	1.36	0.78	13.44	5.46		5.46	5.52111		0.061115	0.00373504	1.11932
59	1	1.55	0.2	0.76	2.15	0.42	1.36	0.79	13.12	5.4925		5.49	5.95754		0.467536	0.21859	8.51614
60	1	1.54	0.19	0.75	2.14	0.42	1.37	0.77	13.76	5.47188		5.47	5.24371		0.226291	0.0512076	4.13695
61	1	1.53	0.19	0.74	2.12	0.41	1.36	0.77	13.12	5.58156		5.58	5.53662		0.043375	0.00188139	0.77733
62	1	1.55	0.18	0.74	2.14	0.41	1.36	0.78	13.44	5.46		5.46	5.52111		0.061115	0.00373504	1.11932
63	1	1.55	0.2	0.76	2.15	0.42	1.36	0.79	13.44	5.46		5.46	5.7735		0.313497	0.0982804	5.7417
64	1	1.7	0.25	0.87	2.3	0.58	1.58	0.94	17.28	6.35625		6.36	6.18651		0.173487	0.0300977	2.72778
65	1	1.7	0.25	0.86	2.28	0.57	1.57	0.95	16.96	6.32094		6.32	6.2477		0.072299	0.00522715	1.14397
67	1	1.68	0.26	0.85	2.3	0.59	1.59	0.94	16.64	6.23906		6.24	5.86956		0.370442	0.137227	5.93657
68	1	1.7	0.25	0.87	2.3	0.58	1.58	0.94	17.28	6.35625		6.36	6.18651		0.173487	0.0300977	2.72778
69	1	1.7	0.25	0.86	2.28	0.57	1.57	0.95	16.96	6.32094		6.32	6.2477		0.072299	0.00522715	1.14397
70	1	1.69	0.26	0.85	2.29	0.58	1.56	0.96	16.64	6.23		6.23	6.61679		0.386795	0.14961	6.20859
71	1	1.68	0.26	0.85	2.3	0.59	1.59	0.94	16.64	6.23906		6.24	5.86956		0.370442	0.137227	5.93657
73	1	1.42	0.16	0.68	2.08	0.36	1.29	0.69	12.16	5.15625		5.16	5.03714		0.12286	0.0150946	2.38101
74	1	1.43	0.17	0.69	2.06	0.38	1.28	0.68	11.84	5.17625		5.18	5.18333		0.003329	1.10822e-05	0.0642664
75	1	1.42	0.17	0.68	2.02	0.38	1.27	0.69	11.84	5.15625		5.16	5.33416		0.174156	0.0303303	3.37512
76	1	1.41	0.18	0.68	2.04	0.36	1.28	0.68	12.16	5.29125		5.29	4.86619		0.423813	0.179617	8.01159
77	1	1.42	0.16	0.68	2.08	0.36	1.29	0.69	12.16	5.15625		5.16	5.03714		0.12286	0.0150946	2.38101
78	1	1.43	0.17	0.69	2.06	0.38	1.28	0.68	11.84	5.17625		5.18	5.18333		0.003329	1.10822e-05	0.0642664
79	1	1.42	0.17	0.68	2.07	0.38	1.27	0.69	11.84	5.15625		5.16	5.25513		0.095133	0.00905029	1.84366
80	1	1.41	0.18	0.68	2.04	0.36	1.28	0.68	12.16	5.29125		5.29	4.86619		0.423813	0.179617	8.01159
81	1	1.42	0.17	0.68	2.02	0.39	1.27	0.68	12.16	5.29125		5.29	5.04854		0.241458	0.058302	4.56442
82	1	1.84	0.32	0.95	2.55	0.75	1.64	1.18	20.48	11.8707		11.87	11.7378		0.132197	0.017476	1.11371
83	1	1.82	0.33	0.96	2.57	0.73	1.62	1.19	20.16	12.0127		12.01	12.0028		0.007212	5.20129e-05	0.06005
84	1	1.85	0.33	0.95	2.54	0.72	1.64	1.22	20.48	11.7628		11.76	11.6615		0.098469	0.00969614	0.837321
85	1	1.83	0.32	0.95	2.53	0.75	1.65	1.23	20.16	12.0223		12.02	12.0337		0.013659	0.000186568	0.113636
86	1	1.84	0.32	0.95	2.55	0.75	1.64	1.18	20.48	11.8707		11.87	11.7378		0.132197	0.017476	1.11371
87	1	1.82	0.33	0.96	2.57	0.73	1.62	1.19	20.16	12.0127		12.01	12.0028		0.007212	5.20129e-05	0.06005
88	1	1.85	0.33	0.95	2.54	0.72	1.64	1.22	20.48	11.7628		11.76	11.6615		0.098469	0.00969614	0.837321
89	1	1.83	0.32	0.95	2.53	0.75	1.65	1.23	20.16	12.0223		12.02	12.0337		0.013659	0.000186568	0.113636
91	1	1.53	0.18	0.76	2.15	0.39	1.32	0.85	10.24	9.8555		9.86	9.76719		0.092811	0.00861388	0.941288
92	1	1.52	0.17	0.75	2.14	0.38	1.33	0.87	10.56	9.98006		9.98	9.88204		0.097957	0.00959557	0.981533
94	1	1.51	0.17	0.74	2.14	0.39	1.32	0.87	10.56	9.79344		9.79	9.81564		0.025641	0.000657461	0.26191
96	1	1.52	0.17	0.75	2.14	0.38	1.33	0.87	10.24	9.71425		9.71	10.1543		0.444315	0.197416	4.57585
97	1	1.53	0.18	0.74	2.12	0.38	1.34	0.86	10.56	9.79344		9.79	9.48911		0.300886	0.0905324	3.0734
98	1	1.51	0.17	0.74	2.14	0.39	1.32	0.87	10.56	9.79344		9.79	9.81564		0.025641	0.000657461	0.26191
99	1	1.53	0.18	0.74	2.12	0.38	1.34	0.86	10.56	9.79344		9.79	9.48911		0.300886	0.0905324	3.0734
100	1	1.3	0.12	0.45	1.92	0.22	1.16	0.63	6.4	8.43916		8.44	8.6596		0.219599	0.0482237	2.60188
101	1	1.31	0.11	0.46	1.93	0.22	1.14	0.62	6.72	8.41725		8.42	8.16624		0.253758	0.0643931	3.01375
103	1	1.3	0.12	0.45	1.92	0.21	1.14	0.62	6.4	8.49322		8.49	8.42174		0.06826	0.00465943	0.804005
104	1	1.31	0.11	0.46	1.93	0.22	1.14	0.62	6.72	8.41725		8.42	8.16624		0.253758	0.0643931	3.01375
105	1	1.31	0.13	0.46	1.93	0.21	1.15	0.63	6.4	8.26144		8.26	8.55572		0.29572	0.0874503	3.58015
106	1	1.3	0.12	0.45	1.92	0.21	1.14	0.62	6.4	8.49322		8.49	8.42174		0.06826	0.00465943	0.804005
109	1	1.75	0.3	0.93	2.46	0.68	1.59	1.12	18.24	11.6476		11.65	11.319		0.330979	0.109547	2.84102
110	1	1.74	0.29	0.93	2.45	0.66	1.58	1.14	18.56	11.6418		11.64	11.4896		0.150355	0.0226066	1.29171
111	1	1.74	0.28	0.92	2.46	0.69	1.57	1.11	18.56	11.5793		11.58	11.7194		0.13942	0.0194379	1.20397
112	1	1.76	0.3	0.92	2.47	0.68	1.58	1.14	18.24	11.6781		11.68	11.5657		0.114294	0.0130631	0.978545
114	1	1.74	0.28	0.92	2.46	0.69	1.57	1.11	18.24	11.6781		11.68	11.7298		0.049842	0.00248422	0.426729
115	1	1.76	0.3	0.92	2.47	0.68	1.58	1.14	18.56	11.5793		11.58	11.5565		0.023454	0.00055009	0.202539
117	1	1.74	0.28	0.92	2.46	0.69	1.57	1.11	18.24	11.6781		11.68	11.7298		0.049842	0.00248422	0.426729
118	1	1.7	0.27	0.92	2.35	0.62	1.52	1.07	15.36	11.2035		11.2	11.3646		0.164626	0.0271017	1.46988
120	1	1.71	0.28	0.9	2.34	0.64	1.51	1.06	15.04	11.1668		11.17	11.3821		0.212079	0.0449775	1.89865
121	1	1.72	0.26	0.9	2.33	0.62	1.53	1.08	15.36	11.1628		11.16	11.0447		0.115298	0.0132936	1.03314
122	1	1.71	0.28	0.9	2.34	0.64	1.51	1.06	15.68	11.0723		11.07	11.3453		0.275338	0.075811	2.48724
123	1	1.72	0.26	0.9	2.33	0.62	1.53	1.08	15.04	11.1668		11.17	11.0781		0.091855	0.00843734	0.822337
124	1	1.71	0.28	0.9	2.34	0.64	1.51	1.06	15.36	11.1628		11.16	11.3624		0.202375	0.0409556	1.8134
125	1	1.72	0.26	0.9	2.33	0.62	1.53	1.08	15.04	11.1668		11.17	11.0781		0.091855	0.00843734	0.822337
126	1	1.71	0.28	0.9	2.34	0.64	1.51	1.07	15.36	11.1628		11.16	11.4697		0.309738	0.0959376	2.77543
127	1	1.63	0.22	0.85	2.27	0.55	1.44	1	14.08	10.671		10.67	10.5025		0.167515	0.0280613	1.56996
128	1	1.64	0.21	0.86	2.28	0.54	1.46	1.01	14.08	10.7579		10.76	10.4453		0.314717	0.0990468	2.92488
131	1	1.63	0.22	0.85	2.27	0.55	1.44	1	14.08	10.671		10.67	10.5025		0.167515	0.0280613	1.56996
132	1	1.64	0.21	0.86	2.28	0.54	1.46	1.01	14.08	10.7579		10.76	10.4453		0.314717	0.0990468	2.92488
133	1	1.62	0.21	0.85	2.29	0.54	1.46	1.01	13.76	10.6393		10.64	10.4553		0.184666	0.0341015	1.73558
134	1	1.63	0.23	0.85	2.27	0.55	1.45	1	13.76	10.811		10.81	10.3857		0.424283	0.180016	3.92491
135	1	1.62	0.21	0.85	2.29	0.54	1.46	1.01	13.76	10.6393		10.64	10.4553		0.184666	0.0341015	1.73558
136	1	1.43	0.15	0.68	2.08	0.31	1.27	0.78	8.96	9.43312		9.43	9.71325		0.283245	0.0802277	3.00366
137	1	1.44	0.17	0.69	2.06	0.32	1.28	0.76	8.64	9.58912		9.59	9.55458		0.035424	0.00125486	0.369385
138	1	1.43	0.16	0.68	2.04	0.31	1.26	0.76	9.28	9.39503		9.4	8.95578		0.444217	0.197329	4.72571
139	1	1.42	0.17	0.68	2.08	0.31	1.26	0.78	8.96	9.45881		9.46	9.47184		0.011836	0.000140091	0.125116
141	1	1.43	0.16	0.68	2.04	0.31	1.26	0.76	8.64	9.58912		9.59	9.63213		0.042126	0.0017746	0.43927
143	1	1.43	0.16	0.68	2.04	0.31	1.26	0.76	8.96	9.45881		9.46	9.29687		0.163132	0.026612	1.72444
144	1	1.42	0.17	0.68	2.08	0.31	1.26	0.78	8.96	9.45881		9.46	9.47184		0.011836	0.000140091	0.125116
145	1	1.55	0.2	0.82	2.18	0.48	1.38	0.94	11.84	10.137		10.14	10.4885		0.348479	0.121438	3.43668
146	1	1.58	0.21	0.81	2.22	0.46	1.37	0.95	12.16	10.2607		10.26	10.1644		0.095553	0.00913038	0.931316
147	1	1.57	0.19	0.81	2.21	0.48	1.39	0.96	12.16	10.0131		10.01	10.4776		0.467566	0.218618	4.67099
148	1	1.56	0.21	0.82	2.21	0.46	1.39	0.93	11.84	10.2996		10.3	10.0586		0.241428	0.0582875	2.34396
150	1	1.57	0.19	0.81	2.21	0.48	1.39	0.96	12.16	10.0131		10.01	10.4776		0.467566	0.218618	4.67099
151	1	1.56	0.21	0.82	2.21	0.46	1.39	0.93	11.84	10.2996		10.3	10.0586		0.241428	0.0582875	2.34396
152	1	1.57	0.19	0.81	2.21	0.48	1.39	0.96	12.16	10.0131		10.01	10.4776		0.467566	0.218618	4.67099
153	1	1.56	0.21	0.82	2.21	0.46	1.39	0.93	11.84	10.2996		10.3	10.0586		0.241428	0.0582875	2.34396
154	1	1.38	0.14	0.57	2.01	0.27	1.25	0.69	7.68	8.92781		8.93	8.82637		0.103631	0.0107394	1.16048
157	1	1.38	0.14	0.55	2.01	0.26	1.23	0.68	7.36	8.745		8.75	8.76887		0.018872	0.000356152	0.21568
158	1	1.38	0.14	0.57	2.01	0.27	1.25	0.69	7.68	8.92781		8.93	8.82637		0.103631	0.0107394	1.16048
159	1	1.38	0.13	0.56	2.01	0.28	1.22	0.69	7.36	9.01594		9.02	9.11308		0.093085	0.00866482	1.03198
161	1	1.38	0.14	0.55	2.01	0.26	1.23	0.68	7.36	8.745		8.75	8.76887		0.018872	0.000356152	0.21568
162	1	1.39	0.15	0.57	2	0.28	1.23	0.69	7.36	8.745		8.75	8.98211		0.232109	0.0538746	2.65267	130	130	130
																		24.5257	7.45891	331.215
																		0.188659	0.239533	2.54781

## Sheet: curves (last Lastt) (2)
																				3.2	Old										Observed
																							X1	X2	X3	X4	X5	X6	X7	X8	Yield
					N	P	K	Ca	Mg	Chla	Chlb	Carbohydrate	C/N	ton/ha				C/N	ton/ha	Carbohydrate			N	P	K	Ca	Mg	Chla	Chlb	Carbohydrate	Yield
	TR		R		Y1	Y2	Y3	Y4	Y5	Y11	Y12	Y15	ratio					ratio	OFF year	%			%	%	%	%	%	mg/gFW	mg/gFW	%	ton/ha
Orchard 2-1	TR2	1Season	R1	Orch-1	1.99	0.35	0.98	2.73	0.78	1.89	1.3	24.96	12.5427	8.14687						7.9872	24.96		1.99	0.35	0.98	2.73	0.78	1.89	1.3	24.96	8.14687
Orchard 2-1	TR2	1Season	R2	Orch-1	1.98	0.36	0.99	2.72	0.79	1.91	1.3	25.28	12.7677	8.16563						8.0896	25.28		1.98	0.36	0.99	2.72	0.79	1.91	1.3	25.28	8.16563
Orchard 2-1	TR2	1Season	R3	Orch-1	1.98	0.37	0.98	2.7	0.79	1.92	1.28	24.64	12.4444	8.10469						7.8848	24.64		1.98	0.37	0.98	2.7	0.79	1.92	1.28	24.64	8.10469
Orchard 2-1	TR2	1Season	R4	Orch-1	1.97	0.34	0.98	2.71	0.78	1.92	1.27	24.96	12.6701	8.14625						7.9872	24.96		1.97	0.34	0.98	2.71	0.78	1.92	1.27	24.96	8.14625
Orchard 2-1	TR2	1Season	R5	Orch-1	1.9747	0.35185	0.988819	2.70733	0.79405	1.90828	1.31093	25.1381	12.7301	8.16935						8.04418	25.1381		1.9747	0.35185	0.988819	2.70733	0.79405	1.90828	1.31093	25.1381	8.16935
Orchard 2-1	TR2	1Season	R6	Orch-1	1.98437	0.361239	0.984374	2.69543	0.794064	1.91237	1.28537	24.7473	12.4711	8.10299						7.91914	24.7473		1.98437	0.361239	0.984374	2.69543	0.794064	1.91237	1.28537	24.7473	8.10299
Orchard 2-1	TR2	1Season	R7	Orch-1	1.9846	0.370298	0.977756	2.71852	0.788089	1.89765	1.29573	25.1479	12.6715	7.9934						8.04733	25.1479		1.9846	0.370298	0.977756	2.71852	0.788089	1.89765	1.29573	25.1479	7.9934
Orchard 2-1	TR2	1Season	R8	Orch-1	1.99151	0.339592	0.972336	2.6979	0.790544	1.91327	1.31266	24.2571	12.1803	8.02677						7.76227	24.2571		1.99151	0.339592	0.972336	2.6979	0.790544	1.91327	1.31266	24.2571	8.02677
Orchard 2-1	TR2	1Season	R9	Orch-1	1.97583	0.389802	0.972473	2.71597	0.801572	1.91099	1.27408	24.4632	12.3812	8.16125		1Season	Orch-1	12.5399	8.11302	7.82823	24.4632		1.97583	0.389802	0.972473	2.71597	0.801572	1.91099	1.27408	24.4632	8.16125
Orchard 3-1	TR3	1Season	R1	Orch-2	1.55	0.21	0.82	2.18	0.49	1.48	0.85	14.4	9.29032	5.8725		1Season	Orch-2	9.20423	5.81078	4.608	14.4		1.55	0.21	0.82	2.18	0.49	1.48	0.85	14.4	5.8725
Orchard 3-1	TR3	1Season	R2	Orch-2	1.59	0.22	0.81	2.22	0.48	1.47	0.87	14.72	9.25786	5.73062		1Season	Orch-3	7.70022	4.74517	4.7104	14.72		1.59	0.22	0.81	2.22	0.48	1.47	0.87	14.72	5.73062
Orchard 3-1	TR3	1Season	R3	Orch-2	1.6	0.22	0.81	2.21	0.48	1.49	0.84	14.72	9.2	5.69297		1Season	Orch-4	12.4284	7.65071	4.7104	14.72		1.6	0.22	0.81	2.21	0.48	1.49	0.84	14.72	5.69297
Orchard 3-1	TR3	1Season	R4	Orch-2	1.6	0.24	0.82	2.21	0.47	1.49	0.88	14.4	9	5.81813		1Season	Orch-5	11.6417	7.3501	4.608	14.4		1.6	0.24	0.82	2.21	0.47	1.49	0.88	14.4	5.81813
Orchard 3-1	TR3	1Season	R5	Orch-2	1.56	0.23	0.82	2.18	0.49	1.47	0.85	14.4	9.23077	5.8725		1Season	Orch-6	10.5458	6.67038	4.608	14.4		1.56	0.23	0.82	2.18	0.49	1.47	0.85	14.4	5.8725
Orchard 3-1	TR3	1Season	R6	Orch-2	1.57	0.21	0.81	2.22	0.47	1.48	0.87	14.4	9.17197	5.89281		1Season	Orch-7	8.66249	5.49688	4.608	14.4		1.57	0.21	0.81	2.22	0.47	1.48	0.87	14.4	5.89281
Orchard 3-1	TR3	1Season	R7	Orch-2	1.62	0.22	0.81	2.24	0.49	1.46	0.85	15.04	9.28395	5.67656		1Season	Orch-8	9.96544	6.28028	4.8128	15.04		1.62	0.22	0.81	2.24	0.49	1.46	0.85	15.04	5.67656
Orchard 3-1	TR3	1Season	R8	Orch-2	1.61	0.23	0.8	2.23	0.47	1.5	0.89	14.4	8.9441	5.88938		1Season	Orch-9	8.46376	5.20569	4.608	14.4		1.61	0.23	0.8	2.23	0.47	1.5	0.89	14.4	5.88938
Orchard 3-1	TR3	1Season	R9	Orch-2	1.59	0.24	0.79	2.19	0.5	1.48	0.85	15.04	9.45912	5.85156				10.128	6.36922	4.8128	15.04		1.59	0.24	0.79	2.19	0.5	1.48	0.85	15.04	5.85156
Orchard 4-1	TR4	1Season	R1	Orch-3	1.32	0.17	0.57	1.98	0.28	1.16	0.61	10.24	7.75758	4.83484						3.2768	10.24		1.32	0.17	0.57	1.98	0.28	1.16	0.61	10.24	4.83484
Orchard 4-1	TR4	1Season	R2	Orch-3	1.35	0.16	0.56	1.96	0.27	1.15	0.62	10.56	7.82222	4.725						3.3792	10.56		1.35	0.16	0.56	1.96	0.27	1.15	0.62	10.56	4.725
Orchard 4-1	TR4	1Season	R3	Orch-3	1.35	0.16	0.55	1.94	0.26	1.13	0.61	9.92	7.34815	4.66094						3.1744	9.92		1.35	0.16	0.55	1.94	0.26	1.13	0.61	9.92	4.66094
Orchard 4-1	TR4	1Season	R4	Orch-3	1.32	0.15	0.55	1.94	0.26	1.14	0.62	10.24	7.75758	4.77						3.2768	10.24		1.32	0.15	0.55	1.94	0.26	1.14	0.62	10.24	4.77
Orchard 4-1	TR4	1Season	R5	Orch-3	1.32	0.17	0.57	1.98	0.28	1.16	0.61	10.24	7.75758	4.83484						3.2768	10.24		1.32	0.17	0.57	1.98	0.28	1.16	0.61	10.24	4.83484
Orchard 4-1	TR4	1Season	R6	Orch-3	1.35	0.16	0.56	1.96	0.27	1.15	0.62	10.56	7.82222	4.725						3.3792	10.56		1.35	0.16	0.56	1.96	0.27	1.15	0.62	10.56	4.725
Orchard 4-1	TR4	1Season	R7	Orch-3	1.32	0.16	0.57	1.94	0.26	1.15	0.61	9.92	7.51515	4.66094						3.1744	9.92		1.32	0.16	0.57	1.94	0.26	1.15	0.61	9.92	4.66094
Orchard 4-1	TR4	1Season	R8	Orch-3	1.33	0.17	0.55	1.95	0.29	1.14	0.61	10.24	7.69925	4.77						3.2768	10.24		1.33	0.17	0.55	1.95	0.29	1.14	0.61	10.24	4.77
Orchard 4-1	TR4	1Season	R9	Orch-3	1.35	0.18	0.58	1.97	0.28	1.15	0.62	10.56	7.82222	4.725						3.3792	10.56		1.35	0.18	0.58	1.97	0.28	1.15	0.62	10.56	4.725
Orchard 5-1	TR5	1Season	R1	Orch-4	1.92	0.34	0.96	2.64	0.75	1.85	1.22	23.36	12.1667	7.76						7.4752	23.36		1.92	0.34	0.96	2.64	0.75	1.85	1.22	23.36	7.76
Orchard 5-1	TR5	1Season	R2	Orch-4	1.92	0.33	0.95	2.65	0.76	1.86	1.21	23.68	12.3333	7.59938						7.5776	23.68		1.92	0.33	0.95	2.65	0.76	1.86	1.21	23.68	7.59938
Orchard 5-1	TR5	1Season	R3	Orch-4	1.91	0.33	0.94	2.66	0.76	1.87	1.23	24	12.5654	7.65938						7.68	24		1.91	0.33	0.94	2.66	0.76	1.87	1.23	24	7.65938
Orchard 5-1	TR5	1Season	R4	Orch-4	1.9	0.34	0.94	2.62	0.75	1.85	1.24	23.68	12.4632	7.63984						7.5776	23.68		1.9	0.34	0.94	2.62	0.75	1.85	1.24	23.68	7.63984
Orchard 5-1	TR5	1Season	R5	Orch-4	1.92	0.33	0.95	2.65	0.76	1.86	1.21	23.68	12.3333	7.59938						7.5776	23.68		1.92	0.33	0.95	2.65	0.76	1.86	1.21	23.68	7.59938
Orchard 5-1	TR5	1Season	R6	Orch-4	1.91	0.33	0.94	2.66	0.76	1.87	1.23	24	12.5654	7.65938						7.68	24		1.91	0.33	0.94	2.66	0.76	1.87	1.23	24	7.65938
Orchard 5-1	TR5	1Season	R7	Orch-4	1.9	0.34	0.94	2.62	0.75	1.85	1.24	23.68	12.4632	7.63984						7.5776	23.68		1.9	0.34	0.94	2.62	0.75	1.85	1.24	23.68	7.63984
Orchard 5-1	TR5	1Season	R8	Orch-4	1.9	0.34	0.94	2.62	0.75	1.85	1.24	24	12.6316	7.65938						7.68	24		1.9	0.34	0.94	2.62	0.75	1.85	1.24	24	7.65938
Orchard 5-1	TR5	1Season	R9	Orch-4	1.92	0.33	0.95	2.65	0.76	1.86	1.21	23.68	12.3333	7.63984						7.5776	23.68		1.92	0.33	0.95	2.65	0.76	1.86	1.21	23.68	7.63984
Orchard 6-1	TR6	1Season	R1	Orch-5	1.84	0.34	0.93	2.55	0.71	1.78	1.15	21.76	11.8261	7.34312						6.9632	21.76		1.84	0.34	0.93	2.55	0.71	1.78	1.15	21.76	7.34312
Orchard 6-1	TR6	1Season	R2	Orch-5	1.83	0.32	0.93	2.57	0.72	1.76	1.15	21.12	11.541	7.32422						6.7584	21.12		1.83	0.32	0.93	2.57	0.72	1.76	1.15	21.12	7.32422
Orchard 6-1	TR6	1Season	R3	Orch-5	1.85	0.33	0.92	2.54	0.71	1.78	1.14	21.44	11.5892	7.4025						6.8608	21.44		1.85	0.33	0.92	2.54	0.71	1.78	1.14	21.44	7.4025
Orchard 6-1	TR6	1Season	R4	Orch-5	1.86	0.32	0.92	2.53	0.73	1.79	1.14	21.76	11.6989	7.30438						6.9632	21.76		1.86	0.32	0.92	2.53	0.73	1.79	1.14	21.76	7.30438
Orchard 6-1	TR6	1Season	R5	Orch-5	1.83	0.32	0.93	2.57	0.72	1.76	1.15	21.44	11.7158	7.4025						6.8608	21.44		1.83	0.32	0.93	2.57	0.72	1.76	1.15	21.44	7.4025
Orchard 6-1	TR6	1Season	R6	Orch-5	1.85	0.33	0.92	2.54	0.71	1.78	1.14	21.76	11.7622	7.30438						6.9632	21.76		1.85	0.33	0.92	2.54	0.71	1.78	1.14	21.76	7.30438
Orchard 6-1	TR6	1Season	R7	Orch-5	1.86	0.32	0.92	2.53	0.73	1.79	1.14	21.76	11.6989	7.34312						6.9632	21.76		1.86	0.32	0.92	2.53	0.73	1.79	1.14	21.76	7.34312
Orchard 6-1	TR6	1Season	R8	Orch-5	1.85	0.33	0.92	2.54	0.71	1.78	1.14	21.12	11.4162	7.32422						6.7584	21.12		1.85	0.33	0.92	2.54	0.71	1.78	1.14	21.12	7.32422
Orchard 6-1	TR6	1Season	R9	Orch-5	1.86	0.32	0.92	2.53	0.73	1.79	1.14	21.44	11.5269	7.4025						6.8608	21.44		1.86	0.32	0.92	2.53	0.73	1.79	1.14	21.44	7.4025
Orchard 7-1	TR7	1Season	R1	Orch-6	1.75	0.28	0.92	2.41	0.62	1.69	1.05	18.56	10.6057	6.72969						5.9392	18.56		1.75	0.28	0.92	2.41	0.62	1.69	1.05	18.56	6.72969
Orchard 7-1	TR7	1Season	R2	Orch-6	1.77	0.3	0.9	2.43	0.64	1.67	1.03	18.88	10.6667	6.67						6.0416	18.88		1.77	0.3	0.9	2.43	0.64	1.67	1.03	18.88	6.67
Orchard 7-1	TR7	1Season	R3	Orch-6	1.77	0.29	0.9	2.41	0.63	1.66	1.06	18.24	10.3051	6.70922						5.8368	18.24		1.77	0.29	0.9	2.41	0.63	1.66	1.06	18.24	6.70922
Orchard 7-1	TR7	1Season	R4	Orch-6	1.76	0.27	0.9	2.4	0.65	1.67	1.05	18.56	10.5455	6.57281						5.9392	18.56		1.76	0.27	0.9	2.4	0.65	1.67	1.05	18.56	6.57281
Orchard 7-1	TR7	1Season	R5	Orch-6	1.75	0.28	0.92	2.41	0.62	1.69	1.05	18.56	10.6057	6.72969						5.9392	18.56		1.75	0.28	0.92	2.41	0.62	1.69	1.05	18.56	6.72969
Orchard 7-1	TR7	1Season	R6	Orch-6	1.77	0.3	0.9	2.43	0.64	1.67	1.03	18.88	10.6667	6.67						6.0416	18.88		1.77	0.3	0.9	2.43	0.64	1.67	1.03	18.88	6.67
Orchard 7-1	TR7	1Season	R7	Orch-6	1.77	0.29	0.9	2.41	0.63	1.66	1.06	18.24	10.3051	6.70922						5.8368	18.24		1.77	0.29	0.9	2.41	0.63	1.66	1.06	18.24	6.70922
Orchard 7-1	TR7	1Season	R8	Orch-6	1.76	0.27	0.9	2.4	0.65	1.67	1.05	18.56	10.5455	6.57281						5.9392	18.56		1.76	0.27	0.9	2.4	0.65	1.67	1.05	18.56	6.57281
Orchard 7-1	TR7	1Season	R9	Orch-6	1.77	0.29	0.9	2.41	0.63	1.66	1.06	18.88	10.6667	6.67						6.0416	18.88		1.77	0.29	0.9	2.41	0.63	1.66	1.06	18.88	6.67
Orchard 8-1	TR8	1Season	R1	Orch-7	1.55	0.2	0.76	2.15	0.42	1.36	0.79	13.12	8.46452	5.4925						4.1984	13.12		1.55	0.2	0.76	2.15	0.42	1.36	0.79	13.12	5.4925
Orchard 8-1	TR8	1Season	R2	Orch-7	1.54	0.19	0.75	2.14	0.42	1.37	0.77	13.76	8.93506	5.47188						4.4032	13.76		1.54	0.19	0.75	2.14	0.42	1.37	0.77	13.76	5.47188
Orchard 8-1	TR8	1Season	R3	Orch-7	1.53	0.19	0.74	2.12	0.41	1.36	0.77	13.12	8.57516	5.58156						4.1984	13.12		1.53	0.19	0.74	2.12	0.41	1.36	0.77	13.12	5.58156
Orchard 8-1	TR8	1Season	R4	Orch-7	1.55	0.18	0.74	2.14	0.41	1.36	0.78	13.44	8.67097	5.46						4.3008	13.44		1.55	0.18	0.74	2.14	0.41	1.36	0.78	13.44	5.46
Orchard 8-1	TR8	1Season	R5	Orch-7	1.55	0.2	0.76	2.15	0.42	1.36	0.79	13.12	8.46452	5.4925						4.1984	13.12		1.55	0.2	0.76	2.15	0.42	1.36	0.79	13.12	5.4925
Orchard 8-1	TR8	1Season	R6	Orch-7	1.54	0.19	0.75	2.14	0.42	1.37	0.77	13.76	8.93506	5.47188						4.4032	13.76		1.54	0.19	0.75	2.14	0.42	1.37	0.77	13.76	5.47188
Orchard 8-1	TR8	1Season	R7	Orch-7	1.53	0.19	0.74	2.12	0.41	1.36	0.77	13.12	8.57516	5.58156						4.1984	13.12		1.53	0.19	0.74	2.12	0.41	1.36	0.77	13.12	5.58156
Orchard 8-1	TR8	1Season	R8	Orch-7	1.55	0.18	0.74	2.14	0.41	1.36	0.78	13.44	8.67097	5.46						4.3008	13.44		1.55	0.18	0.74	2.14	0.41	1.36	0.78	13.44	5.46
Orchard 8-1	TR8	1Season	R9	Orch-7	1.55	0.2	0.76	2.15	0.42	1.36	0.79	13.44	8.67097	5.46						4.3008	13.44		1.55	0.2	0.76	2.15	0.42	1.36	0.79	13.44	5.46
Orchard 9-1	TR9	1Season	R1	Orch-8	1.7	0.25	0.87	2.3	0.58	1.58	0.94	17.28	10.1647	6.35625						5.5296	17.28		1.7	0.25	0.87	2.3	0.58	1.58	0.94	17.28	6.35625
Orchard 9-1	TR9	1Season	R2	Orch-8	1.7	0.25	0.86	2.28	0.57	1.57	0.95	16.96	9.97647	6.32094						5.4272	16.96		1.7	0.25	0.86	2.28	0.57	1.57	0.95	16.96	6.32094
Orchard 9-1	TR9	1Season	R3	Orch-8	1.69	0.26	0.85	2.29	0.58	1.56	0.96	16.64	9.84615	6.23						5.3248	16.64		1.69	0.26	0.85	2.29	0.58	1.56	0.96	16.64	6.23
Orchard 9-1	TR9	1Season	R4	Orch-8	1.68	0.26	0.85	2.3	0.59	1.59	0.94	16.64	9.90476	6.23906						5.3248	16.64		1.68	0.26	0.85	2.3	0.59	1.59	0.94	16.64	6.23906
Orchard 9-1	TR9	1Season	R5	Orch-8	1.7	0.25	0.87	2.3	0.58	1.58	0.94	17.28	10.1647	6.35625						5.5296	17.28		1.7	0.25	0.87	2.3	0.58	1.58	0.94	17.28	6.35625
Orchard 9-1	TR9	1Season	R6	Orch-8	1.7	0.25	0.86	2.28	0.57	1.57	0.95	16.96	9.97647	6.32094						5.4272	16.96		1.7	0.25	0.86	2.28	0.57	1.57	0.95	16.96	6.32094
Orchard 9-1	TR9	1Season	R7	Orch-8	1.69	0.26	0.85	2.29	0.58	1.56	0.96	16.64	9.84615	6.23						5.3248	16.64		1.69	0.26	0.85	2.29	0.58	1.56	0.96	16.64	6.23
Orchard 9-1	TR9	1Season	R8	Orch-8	1.68	0.26	0.85	2.3	0.59	1.59	0.94	16.64	9.90476	6.23906						5.3248	16.64		1.68	0.26	0.85	2.3	0.59	1.59	0.94	16.64	6.23906
Orchard 9-1	TR9	1Season	R9	Orch-8	1.68	0.26	0.85	2.3	0.59	1.59	0.98	16.64	9.90476	6.23						5.3248	16.64		1.68	0.26	0.85	2.3	0.59	1.59	0.98	16.64	6.23
Orchard 10-1	TR10	1Season	R1	Orch-9	1.42	0.16	0.68	2.08	0.36	1.29	0.69	12.16	8.56338	5.15625						3.8912	12.16		1.42	0.16	0.68	2.08	0.36	1.29	0.69	12.16	5.15625
Orchard 10-1	TR10	1Season	R2	Orch-9	1.43	0.17	0.69	2.06	0.38	1.28	0.68	11.84	8.27972	5.17625						3.7888	11.84		1.43	0.17	0.69	2.06	0.38	1.28	0.68	11.84	5.17625
Orchard 10-1	TR10	1Season	R3	Orch-9	1.42	0.17	0.68	2.02	0.38	1.27	0.69	11.84	8.33803	5.15625						3.7888	11.84		1.42	0.17	0.68	2.02	0.38	1.27	0.69	11.84	5.15625
Orchard 10-1	TR10	1Season	R4	Orch-9	1.41	0.18	0.68	2.04	0.36	1.28	0.68	12.16	8.62411	5.29125						3.8912	12.16		1.41	0.18	0.68	2.04	0.36	1.28	0.68	12.16	5.29125
Orchard 10-1	TR10	1Season	R5	Orch-9	1.42	0.16	0.68	2.08	0.36	1.29	0.69	12.16	8.56338	5.15625						3.8912	12.16		1.42	0.16	0.68	2.08	0.36	1.29	0.69	12.16	5.15625
Orchard 10-1	TR10	1Season	R6	Orch-9	1.43	0.17	0.69	2.06	0.38	1.28	0.68	11.84	8.27972	5.17625						3.7888	11.84		1.43	0.17	0.69	2.06	0.38	1.28	0.68	11.84	5.17625
Orchard 10-1	TR10	1Season	R7	Orch-9	1.42	0.17	0.68	2.07	0.38	1.27	0.69	11.84	8.33803	5.15625						3.7888	11.84		1.42	0.17	0.68	2.07	0.38	1.27	0.69	11.84	5.15625
Orchard 10-1	TR10	1Season	R8	Orch-9	1.41	0.18	0.68	2.04	0.36	1.28	0.68	12.16	8.62411	5.29125						3.8912	12.16		1.41	0.18	0.68	2.04	0.36	1.28	0.68	12.16	5.29125
Orchard 10-1	TR10	1Season	R9	Orch-9	1.42	0.17	0.68	2.02	0.39	1.27	0.68	12.16	8.56338	5.29125	6.36922					3.8912	12.16		1.42	0.17	0.68	2.02	0.39	1.27	0.68	12.16	5.29125
Orchard 2-1	TR2	2Season	R1	Orch-1	1.84	0.32	0.95	2.55	0.75	1.64	1.18	20.48	11.1304	11.8707		2Season	Orch-2	11.0731	11.9	6.5536	20.48		1.84	0.32	0.95	2.55	0.75	1.64	1.18	20.48	11.8707
Orchard 2-1	TR2	2Season	R2	Orch-1	1.82	0.33	0.96	2.57	0.73	1.62	1.19	20.16	11.0769	12.0127		2Season	Orch-3	6.8625	9.82421	6.4512	20.16		1.82	0.33	0.96	2.57	0.73	1.62	1.19	20.16	12.0127
Orchard 2-1	TR2	2Season	R3	Orch-1	1.85	0.33	0.95	2.54	0.72	1.64	1.22	20.48	11.0703	11.7628		2Season	Orch-4	4.95648	8.36732	6.5536	20.48		1.85	0.33	0.95	2.54	0.72	1.64	1.22	20.48	11.7628
Orchard 2-1	TR2	2Season	R4	Orch-1	1.83	0.32	0.95	2.53	0.75	1.65	1.23	20.16	11.0164	12.0223		2Season	Orch-4	10.5311	11.6378	6.4512	20.16		1.83	0.32	0.95	2.53	0.75	1.65	1.23	20.16	12.0223
Orchard 2-1	TR2	2Season	R5	Orch-1	1.84	0.32	0.95	2.55	0.75	1.64	1.18	20.48	11.1304	11.8707		2Season	Orch-5	8.94444	11.1486	6.5536	20.48		1.84	0.32	0.95	2.55	0.75	1.64	1.18	20.48	11.8707
Orchard 2-1	TR2	2Season	R6	Orch-1	1.82	0.33	0.96	2.57	0.73	1.62	1.19	20.16	11.0769	12.0127		2Season	Orch-6	8.53464	10.7109	6.4512	20.16		1.82	0.33	0.96	2.57	0.73	1.62	1.19	20.16	12.0127
Orchard 2-1	TR2	2Season	R7	Orch-1	1.85	0.33	0.95	2.54	0.72	1.64	1.22	20.48	11.0703	11.7628		2Season	Orch-7	6.27112	9.46789	6.5536	20.48		1.85	0.33	0.95	2.54	0.72	1.64	1.22	20.48	11.7628
Orchard 2-1	TR2	2Season	R8	Orch-1	1.83	0.32	0.95	2.53	0.75	1.65	1.23	20.16	11.0164	12.0223		2Season	Orch-8	7.67067	10.1774	6.4512	20.16		1.83	0.32	0.95	2.53	0.75	1.65	1.23	20.16	12.0223
Orchard 2-1	TR2	2Season	R9	Orch-1	1.85	0.33	0.95	2.54	0.72	1.64	1.22	20.48	11.0703	11.7628		2Season	Orch-9	5.32091	8.87028	6.5536	20.48		1.85	0.33	0.95	2.54	0.72	1.64	1.22	20.48	11.7628
Orchard 3-1	TR3	2Season	R1	Orch-2	1.53	0.18	0.76	2.15	0.39	1.32	0.85	10.24	6.69281	9.8555				7.79612	10.2338	3.2768	10.24		1.53	0.18	0.76	2.15	0.39	1.32	0.85	10.24	9.8555
Orchard 3-1	TR3	2Season	R2	Orch-2	1.52	0.17	0.75	2.14	0.38	1.33	0.87	10.56	6.94737	9.98006						3.3792	10.56		1.52	0.17	0.75	2.14	0.38	1.33	0.87	10.56	9.98006
Orchard 3-1	TR3	2Season	R3	Orch-2	1.53	0.18	0.74	2.12	0.38	1.34	0.86	10.24	6.69281	9.71425						3.2768	10.24		1.53	0.18	0.74	2.12	0.38	1.34	0.86	10.24	9.71425
Orchard 3-1	TR3	2Season	R4	Orch-2	1.51	0.17	0.74	2.14	0.39	1.32	0.87	10.56	6.99338	9.79344						3.3792	10.56		1.51	0.17	0.74	2.14	0.39	1.32	0.87	10.56	9.79344
Orchard 3-1	TR3	2Season	R5	Orch-2	1.53	0.18	0.76	2.15	0.39	1.32	0.85	10.56	6.90196	9.98006						3.3792	10.56		1.53	0.18	0.76	2.15	0.39	1.32	0.85	10.56	9.98006
Orchard 3-1	TR3	2Season	R6	Orch-2	1.52	0.17	0.75	2.14	0.38	1.33	0.87	10.24	6.73684	9.71425						3.2768	10.24		1.52	0.17	0.75	2.14	0.38	1.33	0.87	10.24	9.71425
Orchard 3-1	TR3	2Season	R7	Orch-2	1.53	0.18	0.74	2.12	0.38	1.34	0.86	10.56	6.90196	9.79344						3.3792	10.56		1.53	0.18	0.74	2.12	0.38	1.34	0.86	10.56	9.79344
Orchard 3-1	TR3	2Season	R8	Orch-2	1.51	0.17	0.74	2.14	0.39	1.32	0.87	10.56	6.99338	9.79344						3.3792	10.56		1.51	0.17	0.74	2.14	0.39	1.32	0.87	10.56	9.79344
Orchard 3-1	TR3	2Season	R9	Orch-2	1.53	0.18	0.74	2.12	0.38	1.34	0.86	10.56	6.90196	9.79344						3.3792	10.56		1.53	0.18	0.74	2.12	0.38	1.34	0.86	10.56	9.79344
Orchard 4-1	TR4	2Season	R1	Orch-3	1.3	0.12	0.45	1.92	0.22	1.16	0.63	6.4	4.92308	8.43916						2.048	6.4		1.3	0.12	0.45	1.92	0.22	1.16	0.63	6.4	8.43916
Orchard 4-1	TR4	2Season	R2	Orch-3	1.31	0.11	0.46	1.93	0.22	1.14	0.62	6.72	5.12977	8.41725						2.1504	6.72		1.31	0.11	0.46	1.93	0.22	1.14	0.62	6.72	8.41725
Orchard 4-1	TR4	2Season	R3	Orch-3	1.31	0.13	0.46	1.93	0.21	1.15	0.63	6.4	4.8855	8.26144						2.048	6.4		1.31	0.13	0.46	1.93	0.21	1.15	0.63	6.4	8.26144
Orchard 4-1	TR4	2Season	R4	Orch-3	1.3	0.12	0.45	1.92	0.21	1.14	0.62	6.4	4.92308	8.49322						2.048	6.4		1.3	0.12	0.45	1.92	0.21	1.14	0.62	6.4	8.49322
Orchard 4-1	TR4	2Season	R5	Orch-3	1.31	0.11	0.46	1.93	0.22	1.14	0.62	6.72	5.12977	8.41725						2.1504	6.72		1.31	0.11	0.46	1.93	0.22	1.14	0.62	6.72	8.41725
Orchard 4-1	TR4	2Season	R6	Orch-3	1.31	0.13	0.46	1.93	0.21	1.15	0.63	6.4	4.8855	8.26144						2.048	6.4		1.31	0.13	0.46	1.93	0.21	1.15	0.63	6.4	8.26144
Orchard 4-1	TR4	2Season	R7	Orch-3	1.3	0.12	0.45	1.92	0.21	1.14	0.62	6.4	4.92308	8.49322						2.048	6.4		1.3	0.12	0.45	1.92	0.21	1.14	0.62	6.4	8.49322
Orchard 4-1	TR4	2Season	R8	Orch-3	1.31	0.13	0.46	1.93	0.21	1.15	0.63	6.4	4.8855	8.26144						2.048	6.4		1.31	0.13	0.46	1.93	0.21	1.15	0.63	6.4	8.26144
Orchard 4-1	TR4	2Season	R9	Orch-3	1.3	0.12	0.45	1.92	0.21	1.14	0.62	6.4	4.92308	8.26144						2.048	6.4		1.3	0.12	0.45	1.92	0.21	1.14	0.62	6.4	8.26144
Orchard 5-1	TR5	2Season	R1	Orch-4	1.75	0.3	0.93	2.46	0.68	1.59	1.12	18.24	10.4229	11.6476						5.8368	18.24		1.75	0.3	0.93	2.46	0.68	1.59	1.12	18.24	11.6476
Orchard 5-1	TR5	2Season	R2	Orch-4	1.74	0.29	0.93	2.45	0.66	1.58	1.14	18.56	10.6667	11.6418						5.9392	18.56		1.74	0.29	0.93	2.45	0.66	1.58	1.14	18.56	11.6418
Orchard 5-1	TR5	2Season	R3	Orch-4	1.74	0.28	0.92	2.46	0.69	1.57	1.11	18.56	10.6667	11.5793						5.9392	18.56		1.74	0.28	0.92	2.46	0.69	1.57	1.11	18.56	11.5793
Orchard 5-1	TR5	2Season	R4	Orch-4	1.76	0.3	0.92	2.47	0.68	1.58	1.14	18.24	10.3636	11.6781						5.8368	18.24		1.76	0.3	0.92	2.47	0.68	1.58	1.14	18.24	11.6781
Orchard 5-1	TR5	2Season	R5	Orch-4	1.74	0.29	0.93	2.45	0.66	1.58	1.14	18.56	10.6667	11.5793						5.9392	18.56		1.74	0.29	0.93	2.45	0.66	1.58	1.14	18.56	11.5793
Orchard 5-1	TR5	2Season	R6	Orch-4	1.74	0.28	0.92	2.46	0.69	1.57	1.11	18.24	10.4828	11.6781						5.8368	18.24		1.74	0.28	0.92	2.46	0.69	1.57	1.11	18.24	11.6781
Orchard 5-1	TR5	2Season	R7	Orch-4	1.76	0.3	0.92	2.47	0.68	1.58	1.14	18.56	10.5455	11.5793						5.9392	18.56		1.76	0.3	0.92	2.47	0.68	1.58	1.14	18.56	11.5793
Orchard 5-1	TR5	2Season	R8	Orch-4	1.74	0.29	0.93	2.45	0.66	1.58	1.14	18.24	10.4828	11.6781						5.8368	18.24		1.74	0.29	0.93	2.45	0.66	1.58	1.14	18.24	11.6781
Orchard 5-1	TR5	2Season	R9	Orch-4	1.74	0.28	0.92	2.46	0.69	1.57	1.11	18.24	10.4828	11.6781						5.8368	18.24		1.74	0.28	0.92	2.46	0.69	1.57	1.11	18.24	11.6781
Orchard 6-1	TR6	2Season	R1	Orch-5	1.7	0.27	0.92	2.35	0.62	1.52	1.07	15.36	9.03529	11.2035						4.9152	15.36		1.7	0.27	0.92	2.35	0.62	1.52	1.07	15.36	11.2035
Orchard 6-1	TR6	2Season	R2	Orch-5	1.72	0.26	0.9	2.36	0.63	1.51	1.08	15.68	9.11628	11.0723						5.0176	15.68		1.72	0.26	0.9	2.36	0.63	1.51	1.08	15.68	11.0723
Orchard 6-1	TR6	2Season	R3	Orch-5	1.71	0.28	0.9	2.34	0.64	1.51	1.06	15.04	8.79532	11.1668						4.8128	15.04		1.71	0.28	0.9	2.34	0.64	1.51	1.06	15.04	11.1668
Orchard 6-1	TR6	2Season	R4	Orch-5	1.72	0.26	0.9	2.33	0.62	1.53	1.08	15.36	8.93023	11.1628						4.9152	15.36		1.72	0.26	0.9	2.33	0.62	1.53	1.08	15.36	11.1628
Orchard 6-1	TR6	2Season	R5	Orch-5	1.71	0.28	0.9	2.34	0.64	1.51	1.06	15.68	9.16959	11.0723						5.0176	15.68		1.71	0.28	0.9	2.34	0.64	1.51	1.06	15.68	11.0723
Orchard 6-1	TR6	2Season	R6	Orch-5	1.72	0.26	0.9	2.33	0.62	1.53	1.08	15.04	8.74419	11.1668						4.8128	15.04		1.72	0.26	0.9	2.33	0.62	1.53	1.08	15.04	11.1668
Orchard 6-1	TR6	2Season	R7	Orch-5	1.71	0.28	0.9	2.34	0.64	1.51	1.06	15.36	8.98246	11.1628						4.9152	15.36		1.71	0.28	0.9	2.34	0.64	1.51	1.06	15.36	11.1628
Orchard 6-1	TR6	2Season	R8	Orch-5	1.72	0.26	0.9	2.33	0.62	1.53	1.08	15.04	8.74419	11.1668						4.8128	15.04		1.72	0.26	0.9	2.33	0.62	1.53	1.08	15.04	11.1668
Orchard 6-1	TR6	2Season	R9	Orch-5	1.71	0.28	0.9	2.34	0.64	1.51	1.07	15.36	8.98246	11.1628						4.9152	15.36		1.71	0.28	0.9	2.34	0.64	1.51	1.07	15.36	11.1628
Orchard 7-1	TR7	2Season	R1	Orch-6	1.63	0.22	0.85	2.27	0.55	1.44	1	14.08	8.63804	10.671						4.5056	14.08		1.63	0.22	0.85	2.27	0.55	1.44	1	14.08	10.671
Orchard 7-1	TR7	2Season	R2	Orch-6	1.64	0.21	0.86	2.28	0.54	1.46	1.01	14.08	8.58537	10.7579						4.5056	14.08		1.64	0.21	0.86	2.28	0.54	1.46	1.01	14.08	10.7579
Orchard 7-1	TR7	2Season	R3	Orch-6	1.62	0.21	0.85	2.29	0.54	1.46	1.01	13.76	8.49383	10.6393						4.4032	13.76		1.62	0.21	0.85	2.29	0.54	1.46	1.01	13.76	10.6393
Orchard 7-1	TR7	2Season	R4	Orch-6	1.63	0.23	0.85	2.27	0.55	1.45	1	13.76	8.44172	10.811						4.4032	13.76		1.63	0.23	0.85	2.27	0.55	1.45	1	13.76	10.811
Orchard 7-1	TR7	2Season	R5	Orch-6	1.63	0.22	0.85	2.27	0.55	1.44	1	14.08	8.63804	10.671						4.5056	14.08		1.63	0.22	0.85	2.27	0.55	1.44	1	14.08	10.671
Orchard 7-1	TR7	2Season	R6	Orch-6	1.64	0.21	0.86	2.28	0.54	1.46	1.01	14.08	8.58537	10.7579						4.5056	14.08		1.64	0.21	0.86	2.28	0.54	1.46	1.01	14.08	10.7579
Orchard 7-1	TR7	2Season	R7	Orch-6	1.62	0.21	0.85	2.29	0.54	1.46	1.01	13.76	8.49383	10.6393						4.4032	13.76		1.62	0.21	0.85	2.29	0.54	1.46	1.01	13.76	10.6393
Orchard 7-1	TR7	2Season	R8	Orch-6	1.63	0.23	0.85	2.27	0.55	1.45	1	13.76	8.44172	10.811						4.4032	13.76		1.63	0.23	0.85	2.27	0.55	1.45	1	13.76	10.811
Orchard 7-1	TR7	2Season	R9	Orch-6	1.62	0.21	0.85	2.29	0.54	1.46	1.01	13.76	8.49383	10.6393						4.4032	13.76		1.62	0.21	0.85	2.29	0.54	1.46	1.01	13.76	10.6393
Orchard 8-1	TR8	2Season	R1	Orch-7	1.43	0.15	0.68	2.08	0.31	1.27	0.78	8.96	6.26573	9.43312						2.8672	8.96		1.43	0.15	0.68	2.08	0.31	1.27	0.78	8.96	9.43312
Orchard 8-1	TR8	2Season	R2	Orch-7	1.44	0.17	0.69	2.06	0.32	1.28	0.76	8.64	6	9.58912						2.7648	8.64		1.44	0.17	0.69	2.06	0.32	1.28	0.76	8.64	9.58912
Orchard 8-1	TR8	2Season	R3	Orch-7	1.43	0.16	0.68	2.04	0.31	1.26	0.76	9.28	6.48951	9.39503						2.9696	9.28		1.43	0.16	0.68	2.04	0.31	1.26	0.76	9.28	9.39503
Orchard 8-1	TR8	2Season	R4	Orch-7	1.42	0.17	0.68	2.08	0.31	1.26	0.78	8.96	6.30986	9.45881						2.8672	8.96		1.42	0.17	0.68	2.08	0.31	1.26	0.78	8.96	9.45881
Orchard 8-1	TR8	2Season	R5	Orch-7	1.44	0.17	0.69	2.06	0.32	1.28	0.76	8.96	6.22222	9.43312						2.8672	8.96		1.44	0.17	0.69	2.06	0.32	1.28	0.76	8.96	9.43312
Orchard 8-1	TR8	2Season	R6	Orch-7	1.43	0.16	0.68	2.04	0.31	1.26	0.76	8.64	6.04196	9.58912						2.7648	8.64		1.43	0.16	0.68	2.04	0.31	1.26	0.76	8.64	9.58912
Orchard 8-1	TR8	2Season	R7	Orch-7	1.42	0.17	0.68	2.08	0.31	1.26	0.78	9.28	6.53521	9.39503						2.9696	9.28		1.42	0.17	0.68	2.08	0.31	1.26	0.78	9.28	9.39503
Orchard 8-1	TR8	2Season	R8	Orch-7	1.43	0.16	0.68	2.04	0.31	1.26	0.76	8.96	6.26573	9.45881						2.8672	8.96		1.43	0.16	0.68	2.04	0.31	1.26	0.76	8.96	9.45881
Orchard 8-1	TR8	2Season	R9	Orch-7	1.42	0.17	0.68	2.08	0.31	1.26	0.78	8.96	6.30986	9.45881						2.8672	8.96		1.42	0.17	0.68	2.08	0.31	1.26	0.78	8.96	9.45881
Orchard 9-1	TR9	2Season	R1	Orch-8	1.55	0.2	0.82	2.18	0.48	1.38	0.94	11.84	7.63871	10.137						3.7888	11.84		1.55	0.2	0.82	2.18	0.48	1.38	0.94	11.84	10.137
Orchard 9-1	TR9	2Season	R2	Orch-8	1.58	0.21	0.81	2.22	0.46	1.37	0.95	12.16	7.6962	10.2607						3.8912	12.16		1.58	0.21	0.81	2.22	0.46	1.37	0.95	12.16	10.2607
Orchard 9-1	TR9	2Season	R3	Orch-8	1.57	0.19	0.81	2.21	0.48	1.39	0.96	12.16	7.74522	10.0131						3.8912	12.16		1.57	0.19	0.81	2.21	0.48	1.39	0.96	12.16	10.0131
Orchard 9-1	TR9	2Season	R4	Orch-8	1.56	0.21	0.82	2.21	0.46	1.39	0.93	11.84	7.58974	10.2996						3.7888	11.84		1.56	0.21	0.82	2.21	0.46	1.39	0.93	11.84	10.2996
Orchard 9-1	TR9	2Season	R5	Orch-8	1.58	0.21	0.81	2.22	0.46	1.37	0.95	12.16	7.6962	10.2607						3.8912	12.16		1.58	0.21	0.81	2.22	0.46	1.37	0.95	12.16	10.2607
Orchard 9-1	TR9	2Season	R6	Orch-8	1.57	0.19	0.81	2.21	0.48	1.39	0.96	12.16	7.74522	10.0131						3.8912	12.16		1.57	0.19	0.81	2.21	0.48	1.39	0.96	12.16	10.0131
Orchard 9-1	TR9	2Season	R7	Orch-8	1.56	0.21	0.82	2.21	0.46	1.39	0.93	11.84	7.58974	10.2996						3.7888	11.84		1.56	0.21	0.82	2.21	0.46	1.39	0.93	11.84	10.2996
Orchard 9-1	TR9	2Season	R8	Orch-8	1.57	0.19	0.81	2.21	0.48	1.39	0.96	12.16	7.74522	10.0131						3.8912	12.16		1.57	0.19	0.81	2.21	0.48	1.39	0.96	12.16	10.0131
Orchard 9-1	TR9	2Season	R9	Orch-8	1.56	0.21	0.82	2.21	0.46	1.39	0.93	11.84	7.58974	10.2996						3.7888	11.84		1.56	0.21	0.82	2.21	0.46	1.39	0.93	11.84	10.2996
Orchard 10-1	TR10	2Season	R1	Orch-9	1.38	0.14	0.57	2.01	0.27	1.25	0.69	7.68	5.56522	8.92781						2.4576	7.68		1.38	0.14	0.57	2.01	0.27	1.25	0.69	7.68	8.92781
Orchard 10-1	TR10	2Season	R2	Orch-9	1.38	0.13	0.56	2.01	0.28	1.22	0.69	7.36	5.33333	9.01594						2.3552	7.36		1.38	0.13	0.56	2.01	0.28	1.22	0.69	7.36	9.01594
Orchard 10-1	TR10	2Season	R3	Orch-9	1.39	0.15	0.57	2	0.28	1.23	0.69	7.04	5.06475	8.855						2.2528	7.04		1.39	0.15	0.57	2	0.28	1.23	0.69	7.04	8.855
Orchard 10-1	TR10	2Season	R4	Orch-9	1.38	0.14	0.55	2.01	0.26	1.23	0.68	7.36	5.33333	8.745						2.3552	7.36		1.38	0.14	0.55	2.01	0.26	1.23	0.68	7.36	8.745
Orchard 10-1	TR10	2Season	R5	Orch-9	1.38	0.14	0.57	2.01	0.27	1.25	0.69	7.68	5.56522	8.92781						2.4576	7.68		1.38	0.14	0.57	2.01	0.27	1.25	0.69	7.68	8.92781
Orchard 10-1	TR10	2Season	R6	Orch-9	1.38	0.13	0.56	2.01	0.28	1.22	0.69	7.36	5.33333	9.01594						2.3552	7.36		1.38	0.13	0.56	2.01	0.28	1.22	0.69	7.36	9.01594
Orchard 10-1	TR10	2Season	R7	Orch-9	1.39	0.15	0.57	2	0.28	1.23	0.69	7.04	5.06475	8.855						2.2528	7.04		1.39	0.15	0.57	2	0.28	1.23	0.69	7.04	8.855
Orchard 10-1	TR10	2Season	R8	Orch-9	1.38	0.14	0.55	2.01	0.26	1.23	0.68	7.36	5.33333	8.745						2.3552	7.36		1.38	0.14	0.55	2.01	0.26	1.23	0.68	7.36	8.745
Orchard 10-1	TR10	2Season	R9	Orch-9	1.39	0.15	0.57	2	0.28	1.23	0.69	7.36	5.29496	8.745	10.2338					2.3552	7.36		1.39	0.15	0.57	2	0.28	1.23	0.69	7.36	8.745
					N	P	K	Ca	Mg	Chla	Chlb	Carbohydrate	C/N	ton/ha									N	P	K	Ca	Mg	Chla	Chlb	Carbohydrate	Yield
				min	1.32	0.15	0.55	1.94	0.26	1.13	0.61	9.92	7.34815	4.66094						3.1744			1.32	0.15	0.55	1.94	0.26	1.13	0.61	9.92	4.66094
				max	1.99151	0.389802	0.99	2.73	0.801572	1.92	1.31266	25.28	12.7677	8.16935						8.0896			1.99151	0.389802	0.99	2.73	0.801572	1.92	1.31266	25.28	8.16935
				mean	1.67557	0.256701	0.823775	2.32883	0.558004	1.5625	0.95554	17.3145	10.128	6.36922						5.54064			1.67557	0.256701	0.823775	2.32883	0.558004	1.5625	0.95554	17.3145	6.36922
			OFF	SD	0.210687	0.0705296	0.130643	0.252033	0.173611	0.252417	0.227781	4.95902	1.69232	1.10418					OFF	1.58689			0.210687	0.0705296	0.130643	0.252033	0.173611	0.252417	0.227781	4.95902	1.10418
																				81			81	81	81	81	81	81	81	81	81
				min	1.3	0.11	0.45	1.92	0.21	1.14	0.62	6.4	4.8855	8.26144						2.048			1.3	0.11	0.45	1.92	0.21	1.14	0.62	6.4	8.26144
				max	1.85	0.33	0.96	2.57	0.75	1.65	1.23	20.48	11.1304	12.0223						6.5536			1.85	0.33	0.96	2.57	0.75	1.65	1.23	20.48	12.0223
				mean	1.57025	0.211852	0.765926	2.21815	0.470988	1.3937	0.922222	12.5788	7.79612	10.2338						4.0252			1.57025	0.211852	0.765926	2.21815	0.470988	1.3937	0.922222	12.5788	10.2338
			ON	SD	0.168834	0.0669535	0.161994	0.19758	0.178056	0.157833	0.191102	4.57349	2.05692	1.16105					ON	1.46352			0.168834	0.0669535	0.161994	0.19758	0.178056	0.157833	0.191102	4.57349	1.16105
				count	81	81	81	81	81	81	81	81	81	81						81			81	81	81	81	81	81	81	81	81
					C/N	yield (t/ha)	C/N (OFF year)	Yield (OFF year)										ON year
			1Season	Orch-1	12.5399	8.11302							ON season	OFF season			6.36922	10.2338
			1Season	Orch-2	9.20423	5.81078						Yield	10.2338	6.36922			10.128	7.79612
			1Season	Orch-3	7.70022	4.74517						C/N ratio	7.79612	10.128
			1Season	Orch-4	12.4284	7.65071
			1Season	Orch-5	11.6417	7.3501
			1Season	Orch-6	10.5458	6.67038
			1Season	Orch-7	8.66249	5.49688
		Off	1Season	Orch-8	9.96544	6.28028
			1Season	Orch-9	8.46376	5.20569	10.128	6.36922
			2Season	Orch-2	11.0731	11.9	C/N (ON year)	Yield (ON year)
			2Season	Orch-3	6.8625	9.82421
			2Season	Orch-4	4.95648	8.36732
		On	2Season	Orch-4	10.5311	11.6378
			2Season	Orch-5	8.94444	11.1486
			2Season	Orch-6	8.53464	10.7109
			2Season	Orch-7	6.27112	9.46789
			2Season	Orch-8	7.67067	10.1774
			2Season	Orch-9	5.32091	8.87028	7.79612	10.2338

## Sheet: Figure ANN
								.
								.
											.
											.

## Sheet: ANN data
								Observed
X1	X2	X3	X4	X5	X6	X7	X8	Yield		ton/ha	ton/ha
N	P	K	Ca	Mg	Chla	Chlb	Carbohydrate	Yield		Yield	Yield
%	%	%	%	%	mg/gFW	mg/gFW	%	ton/ha		observed	ANN		MAE	RMSE	MPA														Average Contr	ibution of	Input	Node on Outputs
1.99	0.35	0.98	2.73	0.78	1.89	1.3	24.96	8.14687					0	0	#DIV/0!								1	1	8.15	8.34614			Network Name:	Mango
1.98	0.36	0.99	2.72	0.79	1.91	1.3	25.28	8.16563					0	0	#DIV/0!								2	1	8.17	8.26014			Iterations:	100000
1.98	0.37	0.98	2.7	0.79	1.92	1.28	24.64	8.10469					0	0	#DIV/0!								3	0	8.1	7.87688
1.97	0.34	0.98	2.71	0.78	1.92	1.27	24.96	8.14625					0	0	#DIV/0!								4	1	8.15	7.78165			Output Node	Input Node	Pe	rcent Contribution
1.9747	0.35185	0.988819	2.70733	0.79405	1.90828	1.31093	25.1381	8.16935					0	0	#DIV/0!								5	1	8.17	8.30892			1	1		4.44
1.98437	0.361239	0.984374	2.69543	0.794064	1.91237	1.28537	24.7473	8.10299					0	0	#DIV/0!								6	1	8.1	8.08009			1	2		6.53
1.9846	0.370298	0.977756	2.71852	0.788089	1.89765	1.29573	25.1479	7.9934					0	0	#DIV/0!								7	0	7.99	8.29291			1	3		15.8
1.99151	0.339592	0.972336	2.6979	0.790544	1.91327	1.31266	24.2571	8.02677					0	0	#DIV/0!								8	1	8.03	8.03692			1	4		3.71
1.97583	0.389802	0.972473	2.71597	0.801572	1.91099	1.27408	24.4632	8.16125					0	0	#DIV/0!								9	1	8.16	7.99923			1	5		14.08
1.55	0.21	0.82	2.18	0.49	1.48	0.85	14.4	5.8725					0	0	#DIV/0!								10	1	5.87	6.27978			1	6		19.2
1.59	0.22	0.81	2.22	0.48	1.47	0.87	14.72	5.73062					0	0	#DIV/0!								11	1	5.73	6.05227			1	7		21.4
1.6	0.22	0.81	2.21	0.48	1.49	0.84	14.72	5.69297					0	0	#DIV/0!								12	0	5.69	5.33154			1	8		14.84
1.6	0.24	0.82	2.21	0.47	1.49	0.88	14.4	5.81813					0	0	#DIV/0!								13	0	5.82	5.9187
1.56	0.23	0.82	2.18	0.49	1.47	0.85	14.4	5.8725					0	0	#DIV/0!								14	1	5.87	6.17295
1.57	0.21	0.81	2.22	0.47	1.48	0.87	14.4	5.89281					0	0	#DIV/0!								15	1	5.89	6.1333
1.62	0.22	0.81	2.24	0.49	1.46	0.85	15.04	5.67656					0	0	#DIV/0!								16	0	5.68	5.74768
1.61	0.23	0.8	2.23	0.47	1.5	0.89	14.4	5.88938					0	0	#DIV/0!								17	0	5.89	5.68565
1.59	0.24	0.79	2.19	0.5	1.48	0.85	15.04	5.85156					0	0	#DIV/0!								18	1	5.85	5.27977
1.32	0.17	0.57	1.98	0.28	1.16	0.61	10.24	4.83484					0	0	#DIV/0!								19	1	4.83	4.74789
1.35	0.16	0.56	1.96	0.27	1.15	0.62	10.56	4.725					0	0	#DIV/0!								20	1	4.73	4.68569
1.35	0.16	0.55	1.94	0.26	1.13	0.61	9.92	4.66094					0	0	#DIV/0!								21	1	4.66	4.93108
1.32	0.15	0.55	1.94	0.26	1.14	0.62	10.24	4.77					0	0	#DIV/0!								22	1	4.77	4.9632
1.32	0.17	0.57	1.98	0.28	1.16	0.61	10.24	4.83484					0	0	#DIV/0!								23	1	4.83	4.74789
1.35	0.16	0.56	1.96	0.27	1.15	0.62	10.56	4.725					0	0	#DIV/0!								24	0	4.73	4.6857
1.32	0.16	0.57	1.94	0.26	1.15	0.61	9.92	4.66094					0	0	#DIV/0!								25	1	4.66	5.10308
1.33	0.17	0.55	1.95	0.29	1.14	0.61	10.24	4.77					0	0	#DIV/0!								26	1	4.77	4.67393
1.35	0.18	0.58	1.97	0.28	1.15	0.62	10.56	4.725					0	0	#DIV/0!								27	1	4.73	4.65667
1.92	0.34	0.96	2.64	0.75	1.85	1.22	23.36	7.76					0	0	#DIV/0!								28	1	7.76	7.8273
1.92	0.33	0.95	2.65	0.76	1.86	1.21	23.68	7.59938					0	0	#DIV/0!								29	1	7.6	7.6937
1.91	0.33	0.94	2.66	0.76	1.87	1.23	24	7.65938					0	0	#DIV/0!		MAE	RMSE	MPA				30	1	7.66	7.58597
1.9	0.34	0.94	2.62	0.75	1.85	1.24	23.68	7.63984					0	0	#DIV/0!	Count	32	32	0				31	0	7.64	7.73881
1.92	0.33	0.95	2.65	0.76	1.86	1.21	23.68	7.59938					0	0	#DIV/0!	Sun	0	0	#DIV/0!				32	0	7.6	7.69371
1.91	0.33	0.94	2.66	0.76	1.87	1.23	24	7.65938					0	0	#DIV/0!		0	0	#DIV/0!				33	1	7.66	7.58597
1.9	0.34	0.94	2.62	0.75	1.85	1.24	23.68	7.63984					0	0	#DIV/0!		#DIV/0!						34	1	7.64	7.73881
1.9	0.34	0.94	2.62	0.75	1.85	1.24	24	7.65938					0	0	#DIV/0!	Count	130	130	0				35	1	7.66	7.78243
1.92	0.33	0.95	2.65	0.76	1.86	1.21	23.68	7.63984					0	0	#DIV/0!	Sun	0	0	#DIV/0!				36	1	7.64	7.6937
1.84	0.34	0.93	2.55	0.71	1.78	1.15	21.76	7.34312					0	0	#DIV/0!		0	0	#DIV/0!				37	1	7.34	7.36475
1.83	0.32	0.93	2.57	0.72	1.76	1.15	21.12	7.32422					0	0	#DIV/0!		#DIV/0!						38	1	7.32	8.02194
1.85	0.33	0.92	2.54	0.71	1.78	1.14	21.44	7.4025					0	0	#DIV/0!								39	1	7.4	7.0803
1.86	0.32	0.92	2.53	0.73	1.79	1.14	21.76	7.30438					0	0	#DIV/0!								40	1	7.3	7.27073
1.83	0.32	0.93	2.57	0.72	1.76	1.15	21.44	7.4025					0	0	#DIV/0!								41	0	7.4	8.06542
1.85	0.33	0.92	2.54	0.71	1.78	1.14	21.76	7.30438					0	0	#DIV/0!								42	1	7.3	7.14379
1.86	0.32	0.92	2.53	0.73	1.79	1.14	21.76	7.34312					0	0	#DIV/0!								43	1	7.34	7.27073
1.85	0.33	0.92	2.54	0.71	1.78	1.14	21.12	7.32422					0	0	#DIV/0!								44	0	7.32	7.01439
1.86	0.32	0.92	2.53	0.73	1.79	1.14	21.44	7.4025					0	0	#DIV/0!								45	1	7.4	7.20747
1.75	0.28	0.92	2.41	0.62	1.69	1.05	18.56	6.72969					0	0	#DIV/0!								46	0	6.73	6.29602
1.77	0.3	0.9	2.43	0.64	1.67	1.03	18.88	6.67					0	0	#DIV/0!								47	1	6.67	6.53552
1.77	0.29	0.9	2.41	0.63	1.66	1.06	18.24	6.70922					0	0	#DIV/0!								48	1	6.71	6.94247
1.76	0.27	0.9	2.4	0.65	1.67	1.05	18.56	6.57281					0	0	#DIV/0!								49	1	6.57	7.12063
1.75	0.28	0.92	2.41	0.62	1.69	1.05	18.56	6.72969					0	0	#DIV/0!								50	1	6.73	6.29602
1.77	0.3	0.9	2.43	0.64	1.67	1.03	18.88	6.67					0	0	#DIV/0!								51	1	6.67	6.53552
1.77	0.29	0.9	2.41	0.63	1.66	1.06	18.24	6.70922					0	0	#DIV/0!								52	1	6.71	6.94247
1.76	0.27	0.9	2.4	0.65	1.67	1.05	18.56	6.57281					0	0	#DIV/0!								53	0	6.57	7.12064
1.77	0.29	0.9	2.41	0.63	1.66	1.06	18.88	6.67					0	0	#DIV/0!								54	1	6.67	6.98141
1.55	0.2	0.76	2.15	0.42	1.36	0.79	13.12	5.4925					0	0	#DIV/0!								55	1	5.49	5.95754
1.54	0.19	0.75	2.14	0.42	1.37	0.77	13.76	5.47188					0	0	#DIV/0!								56	1	5.47	5.24371
1.53	0.19	0.74	2.12	0.41	1.36	0.77	13.12	5.58156					0	0	#DIV/0!								57	1	5.58	5.53662
1.55	0.18	0.74	2.14	0.41	1.36	0.78	13.44	5.46					0	0	#DIV/0!								58	1	5.46	5.52111
1.55	0.2	0.76	2.15	0.42	1.36	0.79	13.12	5.4925					0	0	#DIV/0!								59	1	5.49	5.95754
1.54	0.19	0.75	2.14	0.42	1.37	0.77	13.76	5.47188					0	0	#DIV/0!								60	1	5.47	5.24371
1.53	0.19	0.74	2.12	0.41	1.36	0.77	13.12	5.58156					0	0	#DIV/0!								61	1	5.58	5.53662
1.55	0.18	0.74	2.14	0.41	1.36	0.78	13.44	5.46					0	0	#DIV/0!								62	1	5.46	5.52111
1.55	0.2	0.76	2.15	0.42	1.36	0.79	13.44	5.46					0	0	#DIV/0!								63	1	5.46	5.7735
1.7	0.25	0.87	2.3	0.58	1.58	0.94	17.28	6.35625					0	0	#DIV/0!								64	1	6.36	6.18651
1.7	0.25	0.86	2.28	0.57	1.57	0.95	16.96	6.32094					0	0	#DIV/0!								65	1	6.32	6.2477
1.69	0.26	0.85	2.29	0.58	1.56	0.96	16.64	6.23					0	0	#DIV/0!								66	0	6.23	6.61681
1.68	0.26	0.85	2.3	0.59	1.59	0.94	16.64	6.23906					0	0	#DIV/0!								67	1	6.24	5.86956
1.7	0.25	0.87	2.3	0.58	1.58	0.94	17.28	6.35625					0	0	#DIV/0!								68	1	6.36	6.18651
1.7	0.25	0.86	2.28	0.57	1.57	0.95	16.96	6.32094					0	0	#DIV/0!								69	1	6.32	6.2477
1.69	0.26	0.85	2.29	0.58	1.56	0.96	16.64	6.23					0	0	#DIV/0!								70	1	6.23	6.61679
1.68	0.26	0.85	2.3	0.59	1.59	0.94	16.64	6.23906					0	0	#DIV/0!								71	1	6.24	5.86956
1.68	0.26	0.85	2.3	0.59	1.59	0.98	16.64	6.23					0	0	#DIV/0!								72	0	6.23	6.43168
1.42	0.16	0.68	2.08	0.36	1.29	0.69	12.16	5.15625					0	0	#DIV/0!								73	1	5.16	5.03714
1.43	0.17	0.69	2.06	0.38	1.28	0.68	11.84	5.17625					0	0	#DIV/0!								74	1	5.18	5.18333
1.42	0.17	0.68	2.02	0.38	1.27	0.69	11.84	5.15625					0	0	#DIV/0!								75	1	5.16	5.33416
1.41	0.18	0.68	2.04	0.36	1.28	0.68	12.16	5.29125					0	0	#DIV/0!								76	1	5.29	4.86619
1.42	0.16	0.68	2.08	0.36	1.29	0.69	12.16	5.15625					0	0	#DIV/0!								77	1	5.16	5.03714
1.43	0.17	0.69	2.06	0.38	1.28	0.68	11.84	5.17625					0	0	#DIV/0!								78	1	5.18	5.18333
1.42	0.17	0.68	2.07	0.38	1.27	0.69	11.84	5.15625					0	0	#DIV/0!								79	1	5.16	5.25513
1.41	0.18	0.68	2.04	0.36	1.28	0.68	12.16	5.29125					0	0	#DIV/0!								80	1	5.29	4.86619
1.42	0.17	0.68	2.02	0.39	1.27	0.68	12.16	5.29125					0	0	#DIV/0!								81	1	5.29	5.04854
1.84	0.32	0.95	2.55	0.75	1.64	1.18	20.48	11.8707					0	0	#DIV/0!								82	1	11.87	11.7378
1.82	0.33	0.96	2.57	0.73	1.62	1.19	20.16	12.0127					0	0	#DIV/0!								83	1	12.01	12.0028
1.85	0.33	0.95	2.54	0.72	1.64	1.22	20.48	11.7628					0	0	#DIV/0!								84	1	11.76	11.6615
1.83	0.32	0.95	2.53	0.75	1.65	1.23	20.16	12.0223					0	0	#DIV/0!								85	1	12.02	12.0337
1.84	0.32	0.95	2.55	0.75	1.64	1.18	20.48	11.8707					0	0	#DIV/0!								86	1	11.87	11.7378
1.82	0.33	0.96	2.57	0.73	1.62	1.19	20.16	12.0127					0	0	#DIV/0!								87	1	12.01	12.0028
1.85	0.33	0.95	2.54	0.72	1.64	1.22	20.48	11.7628					0	0	#DIV/0!								88	1	11.76	11.6615
1.83	0.32	0.95	2.53	0.75	1.65	1.23	20.16	12.0223					0	0	#DIV/0!								89	1	12.02	12.0337
1.85	0.33	0.95	2.54	0.72	1.64	1.22	20.48	11.7628					0	0	#DIV/0!								90	0	11.76	11.6615
1.53	0.18	0.76	2.15	0.39	1.32	0.85	10.24	9.8555					0	0	#DIV/0!								91	1	9.86	9.76719
1.52	0.17	0.75	2.14	0.38	1.33	0.87	10.56	9.98006					0	0	#DIV/0!								92	1	9.98	9.88204
1.53	0.18	0.74	2.12	0.38	1.34	0.86	10.24	9.71425					0	0	#DIV/0!								93	0	9.71	9.78269
1.51	0.17	0.74	2.14	0.39	1.32	0.87	10.56	9.79344					0	0	#DIV/0!								94	1	9.79	9.81564
1.53	0.18	0.76	2.15	0.39	1.32	0.85	10.56	9.98006					0	0	#DIV/0!								95	0	9.98	9.49288
1.52	0.17	0.75	2.14	0.38	1.33	0.87	10.24	9.71425					0	0	#DIV/0!								96	1	9.71	10.1543
1.53	0.18	0.74	2.12	0.38	1.34	0.86	10.56	9.79344					0	0	#DIV/0!								97	1	9.79	9.48911
1.51	0.17	0.74	2.14	0.39	1.32	0.87	10.56	9.79344					0	0	#DIV/0!								98	1	9.79	9.81564
1.53	0.18	0.74	2.12	0.38	1.34	0.86	10.56	9.79344					0	0	#DIV/0!								99	1	9.79	9.48911
1.3	0.12	0.45	1.92	0.22	1.16	0.63	6.4	8.43916					0	0	#DIV/0!								100	1	8.44	8.6596
1.31	0.11	0.46	1.93	0.22	1.14	0.62	6.72	8.41725					0	0	#DIV/0!								101	1	8.42	8.16624
1.31	0.13	0.46	1.93	0.21	1.15	0.63	6.4	8.26144					0	0	#DIV/0!								102	0	8.26	8.55572
1.3	0.12	0.45	1.92	0.21	1.14	0.62	6.4	8.49322					0	0	#DIV/0!								103	1	8.49	8.42174
1.31	0.11	0.46	1.93	0.22	1.14	0.62	6.72	8.41725					0	0	#DIV/0!								104	1	8.42	8.16624
1.31	0.13	0.46	1.93	0.21	1.15	0.63	6.4	8.26144					0	0	#DIV/0!								105	1	8.26	8.55572
1.3	0.12	0.45	1.92	0.21	1.14	0.62	6.4	8.49322					0	0	#DIV/0!								106	1	8.49	8.42174
1.31	0.13	0.46	1.93	0.21	1.15	0.63	6.4	8.26144					0	0	#DIV/0!								107	0	8.26	8.55572
1.3	0.12	0.45	1.92	0.21	1.14	0.62	6.4	8.26144					0	0	#DIV/0!								108	0	8.26	8.42174
1.75	0.3	0.93	2.46	0.68	1.59	1.12	18.24	11.6476					0	0	#DIV/0!								109	1	11.65	11.319
1.74	0.29	0.93	2.45	0.66	1.58	1.14	18.56	11.6418					0	0	#DIV/0!								110	1	11.64	11.4896
1.74	0.28	0.92	2.46	0.69	1.57	1.11	18.56	11.5793					0	0	#DIV/0!								111	1	11.58	11.7194
1.76	0.3	0.92	2.47	0.68	1.58	1.14	18.24	11.6781					0	0	#DIV/0!								112	1	11.68	11.5657
1.74	0.29	0.93	2.45	0.66	1.58	1.14	18.56	11.5793					0	0	#DIV/0!								113	0	11.58	11.4897
1.74	0.28	0.92	2.46	0.69	1.57	1.11	18.24	11.6781					0	0	#DIV/0!								114	1	11.68	11.7298
1.76	0.3	0.92	2.47	0.68	1.58	1.14	18.56	11.5793					0	0	#DIV/0!								115	1	11.58	11.5565
1.74	0.29	0.93	2.45	0.66	1.58	1.14	18.24	11.6781					0	0	#DIV/0!								116	0	11.68	11.4956
1.74	0.28	0.92	2.46	0.69	1.57	1.11	18.24	11.6781					0	0	#DIV/0!								117	1	11.68	11.7298
1.7	0.27	0.92	2.35	0.62	1.52	1.07	15.36	11.2035					0	0	#DIV/0!								118	1	11.2	11.3646
1.72	0.26	0.9	2.36	0.63	1.51	1.08	15.68	11.0723					0	0	#DIV/0!								119	0	11.07	11.5312
1.71	0.28	0.9	2.34	0.64	1.51	1.06	15.04	11.1668					0	0	#DIV/0!								120	1	11.17	11.3821
1.72	0.26	0.9	2.33	0.62	1.53	1.08	15.36	11.1628					0	0	#DIV/0!								121	1	11.16	11.0447
1.71	0.28	0.9	2.34	0.64	1.51	1.06	15.68	11.0723					0	0	#DIV/0!								122	1	11.07	11.3453
1.72	0.26	0.9	2.33	0.62	1.53	1.08	15.04	11.1668					0	0	#DIV/0!								123	1	11.17	11.0781
1.71	0.28	0.9	2.34	0.64	1.51	1.06	15.36	11.1628					0	0	#DIV/0!								124	1	11.16	11.3624
1.72	0.26	0.9	2.33	0.62	1.53	1.08	15.04	11.1668					0	0	#DIV/0!								125	1	11.17	11.0781
1.71	0.28	0.9	2.34	0.64	1.51	1.07	15.36	11.1628					0	0	#DIV/0!								126	1	11.16	11.4697
1.63	0.22	0.85	2.27	0.55	1.44	1	14.08	10.671					0	0	#DIV/0!								127	1	10.67	10.5025
1.64	0.21	0.86	2.28	0.54	1.46	1.01	14.08	10.7579					0	0	#DIV/0!								128	1	10.76	10.4453
1.62	0.21	0.85	2.29	0.54	1.46	1.01	13.76	10.6393					0	0	#DIV/0!								129	0	10.64	10.4553
1.63	0.23	0.85	2.27	0.55	1.45	1	13.76	10.811					0	0	#DIV/0!								130	0	10.81	10.3857
1.63	0.22	0.85	2.27	0.55	1.44	1	14.08	10.671					0	0	#DIV/0!								131	1	10.67	10.5025
1.64	0.21	0.86	2.28	0.54	1.46	1.01	14.08	10.7579					0	0	#DIV/0!								132	1	10.76	10.4453
1.62	0.21	0.85	2.29	0.54	1.46	1.01	13.76	10.6393					0	0	#DIV/0!								133	1	10.64	10.4553
1.63	0.23	0.85	2.27	0.55	1.45	1	13.76	10.811					0	0	#DIV/0!								134	1	10.81	10.3857
1.62	0.21	0.85	2.29	0.54	1.46	1.01	13.76	10.6393					0	0	#DIV/0!								135	1	10.64	10.4553
1.43	0.15	0.68	2.08	0.31	1.27	0.78	8.96	9.43312					0	0	#DIV/0!								136	1	9.43	9.71325
1.44	0.17	0.69	2.06	0.32	1.28	0.76	8.64	9.58912					0	0	#DIV/0!								137	1	9.59	9.55458
1.43	0.16	0.68	2.04	0.31	1.26	0.76	9.28	9.39503					0	0	#DIV/0!								138	1	9.4	8.95578
1.42	0.17	0.68	2.08	0.31	1.26	0.78	8.96	9.45881					0	0	#DIV/0!								139	1	9.46	9.47184
1.44	0.17	0.69	2.06	0.32	1.28	0.76	8.96	9.43312					0	0	#DIV/0!								140	0	9.43	9.21455
1.43	0.16	0.68	2.04	0.31	1.26	0.76	8.64	9.58912					0	0	#DIV/0!								141	1	9.59	9.63213
1.42	0.17	0.68	2.08	0.31	1.26	0.78	9.28	9.39503					0	0	#DIV/0!								142	0	9.4	9.13629
1.43	0.16	0.68	2.04	0.31	1.26	0.76	8.96	9.45881					0	0	#DIV/0!								143	1	9.46	9.29687
1.42	0.17	0.68	2.08	0.31	1.26	0.78	8.96	9.45881					0	0	#DIV/0!								144	1	9.46	9.47184
1.55	0.2	0.82	2.18	0.48	1.38	0.94	11.84	10.137					0	0	#DIV/0!								145	1	10.14	10.4885
1.58	0.21	0.81	2.22	0.46	1.37	0.95	12.16	10.2607					0	0	#DIV/0!								146	1	10.26	10.1644
1.57	0.19	0.81	2.21	0.48	1.39	0.96	12.16	10.0131					0	0	#DIV/0!								147	1	10.01	10.4776
1.56	0.21	0.82	2.21	0.46	1.39	0.93	11.84	10.2996					0	0	#DIV/0!								148	1	10.3	10.0586
1.58	0.21	0.81	2.22	0.46	1.37	0.95	12.16	10.2607					0	0	#DIV/0!								149	0	10.26	10.1645
1.57	0.19	0.81	2.21	0.48	1.39	0.96	12.16	10.0131					0	0	#DIV/0!								150	1	10.01	10.4776
1.56	0.21	0.82	2.21	0.46	1.39	0.93	11.84	10.2996					0	0	#DIV/0!								151	1	10.3	10.0586
1.57	0.19	0.81	2.21	0.48	1.39	0.96	12.16	10.0131					0	0	#DIV/0!								152	1	10.01	10.4776
1.56	0.21	0.82	2.21	0.46	1.39	0.93	11.84	10.2996					0	0	#DIV/0!								153	1	10.3	10.0586
1.38	0.14	0.57	2.01	0.27	1.25	0.69	7.68	8.92781					0	0	#DIV/0!								154	1	8.93	8.82637
1.38	0.13	0.56	2.01	0.28	1.22	0.69	7.36	9.01594					0	0	#DIV/0!								155	0	9.02	9.11309
1.39	0.15	0.57	2	0.28	1.23	0.69	7.04	8.855					0	0	#DIV/0!								156	0	8.86	9.35831
1.38	0.14	0.55	2.01	0.26	1.23	0.68	7.36	8.745					0	0	#DIV/0!								157	1	8.75	8.76887
1.38	0.14	0.57	2.01	0.27	1.25	0.69	7.68	8.92781					0	0	#DIV/0!								158	1	8.93	8.82637
1.38	0.13	0.56	2.01	0.28	1.22	0.69	7.36	9.01594					0	0	#DIV/0!								159	1	9.02	9.11308
1.39	0.15	0.57	2	0.28	1.23	0.69	7.04	8.855					0	0	#DIV/0!								160	0	8.86	9.35831
1.38	0.14	0.55	2.01	0.26	1.23	0.68	7.36	8.745					0	0	#DIV/0!								161	1	8.75	8.76887
1.39	0.15	0.57	2	0.28	1.23	0.69	7.36	8.745					0	0	#DIV/0!	130	130	0					162	1	8.75	8.98211
																0	0	#DIV/0!
																0	0	#DIV/0!

## Sheet: curves (last)
																					3.2	Old										Observed
															64									X1	X2	X3	X4	X5	X6	X7	X8	Yield
					N	P	K	Ca	Mg	Chla	Chlb	Carbohydrate		yield kg	ton/ha	C/N					Carbohydrate			N	P	K	Ca	Mg	Chla	Chlb	Carbohydrate	Yield
	TR		R		Y1	Y2	Y3	Y4	Y5	Y11	Y12	Y15		Y21/tree		ratio					%			%	%	%	%	%	mg/gFW	mg/gFW	%	ton/ha
Orchard 2-1	TR2	1Season	R1	Orch-1	1.99	0.35	0.98	2.73	0.78	1.89	1.3	78	8.14687	52.14	8.14687	12.5427					24.96	78		1.99	0.35	0.98	2.73	0.78	1.89	1.3	12.5427	8.14687
Orchard 2-1	TR2	1Season	R2	Orch-1	1.98	0.36	0.99	2.72	0.79	1.91	1.3	79	8.16563	52.26	8.16563	12.7677					25.28	79		1.98	0.36	0.99	2.72	0.79	1.91	1.3	12.7677	8.16563
Orchard 2-1	TR2	1Season	R3	Orch-1	1.98	0.37	0.98	2.7	0.79	1.92	1.28	77	8.10469	51.87	8.10469	12.4444					24.64	77		1.98	0.37	0.98	2.7	0.79	1.92	1.28	12.4444	8.10469
Orchard 2-1	TR2	1Season	R4	Orch-1	1.97	0.34	0.98	2.71	0.78	1.92	1.27	78	8.14625	52.136	8.14625	12.6701					24.96	78		1.97	0.34	0.98	2.71	0.78	1.92	1.27	12.6701	8.14625
Orchard 2-1	TR2	1Season	R5	Orch-1	1.9747	0.35185	0.988819	2.70733	0.79405	1.90828	1.31093	78.5564	8.16935	52.2838	8.16935	12.7301					25.1381	78.5564		1.9747	0.35185	0.988819	2.70733	0.79405	1.90828	1.31093	12.7301	8.16935
Orchard 2-1	TR2	1Season	R6	Orch-1	1.98437	0.361239	0.984374	2.69543	0.794064	1.91237	1.28537	77.3353	8.10299	51.8591	8.10299	12.4711					24.7473	77.3353		1.98437	0.361239	0.984374	2.69543	0.794064	1.91237	1.28537	12.4711	8.10299
Orchard 2-1	TR2	1Season	R7	Orch-1	1.9846	0.370298	0.977756	2.71852	0.788089	1.89765	1.29573	78.5873	7.9934	51.1577	7.9934	12.6715					25.1479	78.5873		1.9846	0.370298	0.977756	2.71852	0.788089	1.89765	1.29573	12.6715	7.9934
Orchard 2-1	TR2	1Season	R8	Orch-1	1.99151	0.339592	0.972336	2.6979	0.790544	1.91327	1.31266	75.8034	8.02677	51.3713	8.02677	12.1803					24.2571	75.8034		1.99151	0.339592	0.972336	2.6979	0.790544	1.91327	1.31266	12.1803	8.02677
Orchard 2-1	TR2	1Season	R9	Orch-1	1.97583	0.389802	0.972473	2.71597	0.801572	1.91099	1.27408	76.4475	8.16125	52.232	8.16125	12.3812	1Season	Orch-1	12.5399	8.11302	24.4632	76.4475		1.97583	0.389802	0.972473	2.71597	0.801572	1.91099	1.27408	12.3812	8.16125
Orchard 3-1	TR3	1Season	R1	Orch-2	1.55	0.21	0.82	2.18	0.49	1.48	0.85	45	5.8725	37.584	5.8725	9.29032					14.4	45		1.55	0.21	0.82	2.18	0.49	1.48	0.85	9.29032	5.8725
Orchard 3-1	TR3	1Season	R2	Orch-2	1.59	0.22	0.81	2.22	0.48	1.47	0.87	46	5.73062	36.676	5.73062	9.25786					14.72	46		1.59	0.22	0.81	2.22	0.48	1.47	0.87	9.25786	5.73062
Orchard 3-1	TR3	1Season	R3	Orch-2	1.6	0.22	0.81	2.21	0.48	1.49	0.84	46	5.69297	36.435	5.69297	9.2					14.72	46		1.6	0.22	0.81	2.21	0.48	1.49	0.84	9.2	5.69297
Orchard 3-1	TR3	1Season	R4	Orch-2	1.6	0.24	0.82	2.21	0.47	1.49	0.88	45	5.81813	37.236	5.81813	9					14.4	45		1.6	0.24	0.82	2.21	0.47	1.49	0.88	9	5.81813
Orchard 3-1	TR3	1Season	R5	Orch-2	1.56	0.23	0.82	2.18	0.49	1.47	0.85	45	5.8725	37.584	5.8725	9.23077					14.4	45		1.56	0.23	0.82	2.18	0.49	1.47	0.85	9.23077	5.8725
Orchard 3-1	TR3	1Season	R6	Orch-2	1.57	0.21	0.81	2.22	0.47	1.48	0.87	45	5.89281	37.714	5.89281	9.17197					14.4	45		1.57	0.21	0.81	2.22	0.47	1.48	0.87	9.17197	5.89281
Orchard 3-1	TR3	1Season	R7	Orch-2	1.62	0.22	0.81	2.24	0.49	1.46	0.85	47	5.67656	36.33	5.67656	9.28395					15.04	47		1.62	0.22	0.81	2.24	0.49	1.46	0.85	9.28395	5.67656
Orchard 3-1	TR3	1Season	R8	Orch-2	1.61	0.23	0.8	2.23	0.47	1.5	0.89	45	5.88938	37.692	5.88938	8.9441					14.4	45		1.61	0.23	0.8	2.23	0.47	1.5	0.89	8.9441	5.88938
Orchard 3-1	TR3	1Season	R9	Orch-2	1.59	0.24	0.79	2.19	0.5	1.48	0.85	47	5.85156	37.45	5.85156	9.45912	1Season	Orch-2	9.20423	5.81078	15.04	47		1.59	0.24	0.79	2.19	0.5	1.48	0.85	9.45912	5.85156
Orchard 4-1	TR4	1Season	R1	Orch-3	1.32	0.17	0.57	1.98	0.28	1.16	0.61	32	4.83484	30.943	4.83484	7.75758					10.24	32		1.32	0.17	0.57	1.98	0.28	1.16	0.61	7.75758	4.83484
Orchard 4-1	TR4	1Season	R2	Orch-3	1.35	0.16	0.56	1.96	0.27	1.15	0.62	33	4.725	30.24	4.725	7.82222					10.56	33		1.35	0.16	0.56	1.96	0.27	1.15	0.62	7.82222	4.725
Orchard 4-1	TR4	1Season	R3	Orch-3	1.35	0.16	0.55	1.94	0.26	1.13	0.61	31	4.66094	29.83	4.66094	7.34815					9.92	31		1.35	0.16	0.55	1.94	0.26	1.13	0.61	7.34815	4.66094
Orchard 4-1	TR4	1Season	R4	Orch-3	1.32	0.15	0.55	1.94	0.26	1.14	0.62	32	4.77	30.528	4.77	7.75758					10.24	32		1.32	0.15	0.55	1.94	0.26	1.14	0.62	7.75758	4.77
Orchard 4-1	TR4	1Season	R5	Orch-3	1.32	0.17	0.57	1.98	0.28	1.16	0.61	32	4.83484	30.943	4.83484	7.75758					10.24	32		1.32	0.17	0.57	1.98	0.28	1.16	0.61	7.75758	4.83484
Orchard 4-1	TR4	1Season	R6	Orch-3	1.35	0.16	0.56	1.96	0.27	1.15	0.62	33	4.725	30.24	4.725	7.82222					10.56	33		1.35	0.16	0.56	1.96	0.27	1.15	0.62	7.82222	4.725
Orchard 4-1	TR4	1Season	R7	Orch-3	1.32	0.16	0.57	1.94	0.26	1.15	0.61	31	4.66094	29.83	4.66094	7.51515					9.92	31		1.32	0.16	0.57	1.94	0.26	1.15	0.61	7.51515	4.66094
Orchard 4-1	TR4	1Season	R8	Orch-3	1.33	0.17	0.55	1.95	0.29	1.14	0.61	32	4.77	30.528	4.77	7.69925					10.24	32		1.33	0.17	0.55	1.95	0.29	1.14	0.61	7.69925	4.77
Orchard 4-1	TR4	1Season	R9	Orch-3	1.35	0.18	0.58	1.97	0.28	1.15	0.62	33	4.725	30.24	4.725	7.82222	1Season	Orch-3	7.70022	4.74517	10.56	33		1.35	0.18	0.58	1.97	0.28	1.15	0.62	7.82222	4.725
Orchard 5-1	TR5	1Season	R1	Orch-4	1.92	0.34	0.96	2.64	0.75	1.85	1.22	73	7.76	49.664	7.76	12.1667					23.36	73		1.92	0.34	0.96	2.64	0.75	1.85	1.22	12.1667	7.76
Orchard 5-1	TR5	1Season	R2	Orch-4	1.92	0.33	0.95	2.65	0.76	1.86	1.21	74	7.59938	48.636	7.59938	12.3333					23.68	74		1.92	0.33	0.95	2.65	0.76	1.86	1.21	12.3333	7.59938
Orchard 5-1	TR5	1Season	R3	Orch-4	1.91	0.33	0.94	2.66	0.76	1.87	1.23	75	7.65938	49.02	7.65938	12.5654					24	75		1.91	0.33	0.94	2.66	0.76	1.87	1.23	12.5654	7.65938
Orchard 5-1	TR5	1Season	R4	Orch-4	1.9	0.34	0.94	2.62	0.75	1.85	1.24	74	7.63984	48.895	7.63984	12.4632					23.68	74		1.9	0.34	0.94	2.62	0.75	1.85	1.24	12.4632	7.63984
Orchard 5-1	TR5	1Season	R5	Orch-4	1.92	0.33	0.95	2.65	0.76	1.86	1.21	74	7.59938	48.636	7.59938	12.3333					23.68	74		1.92	0.33	0.95	2.65	0.76	1.86	1.21	12.3333	7.59938
Orchard 5-1	TR5	1Season	R6	Orch-4	1.91	0.33	0.94	2.66	0.76	1.87	1.23	75	7.65938	49.02	7.65938	12.5654					24	75		1.91	0.33	0.94	2.66	0.76	1.87	1.23	12.5654	7.65938
Orchard 5-1	TR5	1Season	R7	Orch-4	1.9	0.34	0.94	2.62	0.75	1.85	1.24	74	7.63984	48.895	7.63984	12.4632					23.68	74		1.9	0.34	0.94	2.62	0.75	1.85	1.24	12.4632	7.63984
Orchard 5-1	TR5	1Season	R8	Orch-4	1.9	0.34	0.94	2.62	0.75	1.85	1.24	75	7.65938	49.02	7.65938	12.6316					24	75		1.9	0.34	0.94	2.62	0.75	1.85	1.24	12.6316	7.65938
Orchard 5-1	TR5	1Season	R9	Orch-4	1.92	0.33	0.95	2.65	0.76	1.86	1.21	74	7.63984	48.895	7.63984	12.3333	1Season	Orch-4	12.4284	7.65071	23.68	74		1.92	0.33	0.95	2.65	0.76	1.86	1.21	12.3333	7.63984
Orchard 6-1	TR6	1Season	R1	Orch-5	1.84	0.34	0.93	2.55	0.71	1.78	1.15	68	7.34312	46.996	7.34312	11.8261					21.76	68		1.84	0.34	0.93	2.55	0.71	1.78	1.15	11.8261	7.34312
Orchard 6-1	TR6	1Season	R2	Orch-5	1.83	0.32	0.93	2.57	0.72	1.76	1.15	66	7.32422	46.875	7.32422	11.541					21.12	66		1.83	0.32	0.93	2.57	0.72	1.76	1.15	11.541	7.32422
Orchard 6-1	TR6	1Season	R3	Orch-5	1.85	0.33	0.92	2.54	0.71	1.78	1.14	67	7.4025	47.376	7.4025	11.5892					21.44	67		1.85	0.33	0.92	2.54	0.71	1.78	1.14	11.5892	7.4025
Orchard 6-1	TR6	1Season	R4	Orch-5	1.86	0.32	0.92	2.53	0.73	1.79	1.14	68	7.30438	46.748	7.30438	11.6989					21.76	68		1.86	0.32	0.92	2.53	0.73	1.79	1.14	11.6989	7.30438
Orchard 6-1	TR6	1Season	R5	Orch-5	1.83	0.32	0.93	2.57	0.72	1.76	1.15	67	7.4025	47.376	7.4025	11.7158					21.44	67		1.83	0.32	0.93	2.57	0.72	1.76	1.15	11.7158	7.4025
Orchard 6-1	TR6	1Season	R6	Orch-5	1.85	0.33	0.92	2.54	0.71	1.78	1.14	68	7.30438	46.748	7.30438	11.7622					21.76	68		1.85	0.33	0.92	2.54	0.71	1.78	1.14	11.7622	7.30438
Orchard 6-1	TR6	1Season	R7	Orch-5	1.86	0.32	0.92	2.53	0.73	1.79	1.14	68	7.34312	46.996	7.34312	11.6989					21.76	68		1.86	0.32	0.92	2.53	0.73	1.79	1.14	11.6989	7.34312
Orchard 6-1	TR6	1Season	R8	Orch-5	1.85	0.33	0.92	2.54	0.71	1.78	1.14	66	7.32422	46.875	7.32422	11.4162					21.12	66		1.85	0.33	0.92	2.54	0.71	1.78	1.14	11.4162	7.32422
Orchard 6-1	TR6	1Season	R9	Orch-5	1.86	0.32	0.92	2.53	0.73	1.79	1.14	67	7.4025	47.376	7.4025	11.5269	1Season	Orch-5	11.6417	7.3501	21.44	67		1.86	0.32	0.92	2.53	0.73	1.79	1.14	11.5269	7.4025
Orchard 7-1	TR7	1Season	R1	Orch-6	1.75	0.28	0.92	2.41	0.62	1.69	1.05	58	6.72969	43.07	6.72969	10.6057					18.56	58		1.75	0.28	0.92	2.41	0.62	1.69	1.05	10.6057	6.72969
Orchard 7-1	TR7	1Season	R2	Orch-6	1.77	0.3	0.9	2.43	0.64	1.67	1.03	59	6.67	42.688	6.67	10.6667					18.88	59		1.77	0.3	0.9	2.43	0.64	1.67	1.03	10.6667	6.67
Orchard 7-1	TR7	1Season	R3	Orch-6	1.77	0.29	0.9	2.41	0.63	1.66	1.06	57	6.70922	42.939	6.70922	10.3051					18.24	57		1.77	0.29	0.9	2.41	0.63	1.66	1.06	10.3051	6.70922
Orchard 7-1	TR7	1Season	R4	Orch-6	1.76	0.27	0.9	2.4	0.65	1.67	1.05	58	6.57281	42.066	6.57281	10.5455					18.56	58		1.76	0.27	0.9	2.4	0.65	1.67	1.05	10.5455	6.57281
Orchard 7-1	TR7	1Season	R5	Orch-6	1.75	0.28	0.92	2.41	0.62	1.69	1.05	58	6.72969	43.07	6.72969	10.6057					18.56	58		1.75	0.28	0.92	2.41	0.62	1.69	1.05	10.6057	6.72969
Orchard 7-1	TR7	1Season	R6	Orch-6	1.77	0.3	0.9	2.43	0.64	1.67	1.03	59	6.67	42.688	6.67	10.6667					18.88	59		1.77	0.3	0.9	2.43	0.64	1.67	1.03	10.6667	6.67
Orchard 7-1	TR7	1Season	R7	Orch-6	1.77	0.29	0.9	2.41	0.63	1.66	1.06	57	6.70922	42.939	6.70922	10.3051					18.24	57		1.77	0.29	0.9	2.41	0.63	1.66	1.06	10.3051	6.70922
Orchard 7-1	TR7	1Season	R8	Orch-6	1.76	0.27	0.9	2.4	0.65	1.67	1.05	58	6.57281	42.066	6.57281	10.5455					18.56	58		1.76	0.27	0.9	2.4	0.65	1.67	1.05	10.5455	6.57281
Orchard 7-1	TR7	1Season	R9	Orch-6	1.77	0.29	0.9	2.41	0.63	1.66	1.06	59	6.67	42.688	6.67	10.6667	1Season	Orch-6	10.5458	6.67038	18.88	59		1.77	0.29	0.9	2.41	0.63	1.66	1.06	10.6667	6.67
Orchard 8-1	TR8	1Season	R1	Orch-7	1.55	0.2	0.76	2.15	0.42	1.36	0.79	41	5.4925	35.152	5.4925	8.46452					13.12	41		1.55	0.2	0.76	2.15	0.42	1.36	0.79	8.46452	5.4925
Orchard 8-1	TR8	1Season	R2	Orch-7	1.54	0.19	0.75	2.14	0.42	1.37	0.77	43	5.47188	35.02	5.47188	8.93506					13.76	43		1.54	0.19	0.75	2.14	0.42	1.37	0.77	8.93506	5.47188
Orchard 8-1	TR8	1Season	R3	Orch-7	1.53	0.19	0.74	2.12	0.41	1.36	0.77	41	5.58156	35.722	5.58156	8.57516					13.12	41		1.53	0.19	0.74	2.12	0.41	1.36	0.77	8.57516	5.58156
Orchard 8-1	TR8	1Season	R4	Orch-7	1.55	0.18	0.74	2.14	0.41	1.36	0.78	42	5.46	34.944	5.46	8.67097					13.44	42		1.55	0.18	0.74	2.14	0.41	1.36	0.78	8.67097	5.46
Orchard 8-1	TR8	1Season	R5	Orch-7	1.55	0.2	0.76	2.15	0.42	1.36	0.79	41	5.4925	35.152	5.4925	8.46452					13.12	41		1.55	0.2	0.76	2.15	0.42	1.36	0.79	8.46452	5.4925
Orchard 8-1	TR8	1Season	R6	Orch-7	1.54	0.19	0.75	2.14	0.42	1.37	0.77	43	5.47188	35.02	5.47188	8.93506					13.76	43		1.54	0.19	0.75	2.14	0.42	1.37	0.77	8.93506	5.47188
Orchard 8-1	TR8	1Season	R7	Orch-7	1.53	0.19	0.74	2.12	0.41	1.36	0.77	41	5.58156	35.722	5.58156	8.57516					13.12	41		1.53	0.19	0.74	2.12	0.41	1.36	0.77	8.57516	5.58156
Orchard 8-1	TR8	1Season	R8	Orch-7	1.55	0.18	0.74	2.14	0.41	1.36	0.78	42	5.46	34.944	5.46	8.67097					13.44	42		1.55	0.18	0.74	2.14	0.41	1.36	0.78	8.67097	5.46
Orchard 8-1	TR8	1Season	R9	Orch-7	1.55	0.2	0.76	2.15	0.42	1.36	0.79	42	5.46	34.944	5.46	8.67097	1Season	Orch-7	8.66249	5.49688	13.44	42		1.55	0.2	0.76	2.15	0.42	1.36	0.79	8.67097	5.46
Orchard 9-1	TR9	1Season	R1	Orch-8	1.7	0.25	0.87	2.3	0.58	1.58	0.94	54	6.35625	40.68	6.35625	10.1647					17.28	54		1.7	0.25	0.87	2.3	0.58	1.58	0.94	10.1647	6.35625
Orchard 9-1	TR9	1Season	R2	Orch-8	1.7	0.25	0.86	2.28	0.57	1.57	0.95	53	6.32094	40.454	6.32094	9.97647					16.96	53		1.7	0.25	0.86	2.28	0.57	1.57	0.95	9.97647	6.32094
Orchard 9-1	TR9	1Season	R3	Orch-8	1.69	0.26	0.85	2.29	0.58	1.56	0.96	52	6.23	39.872	6.23	9.84615					16.64	52		1.69	0.26	0.85	2.29	0.58	1.56	0.96	9.84615	6.23
Orchard 9-1	TR9	1Season	R4	Orch-8	1.68	0.26	0.85	2.3	0.59	1.59	0.94	52	6.23906	39.93	6.23906	9.90476					16.64	52		1.68	0.26	0.85	2.3	0.59	1.59	0.94	9.90476	6.23906
Orchard 9-1	TR9	1Season	R5	Orch-8	1.7	0.25	0.87	2.3	0.58	1.58	0.94	54	6.35625	40.68	6.35625	10.1647					17.28	54		1.7	0.25	0.87	2.3	0.58	1.58	0.94	10.1647	6.35625
Orchard 9-1	TR9	1Season	R6	Orch-8	1.7	0.25	0.86	2.28	0.57	1.57	0.95	53	6.32094	40.454	6.32094	9.97647					16.96	53		1.7	0.25	0.86	2.28	0.57	1.57	0.95	9.97647	6.32094
Orchard 9-1	TR9	1Season	R7	Orch-8	1.69	0.26	0.85	2.29	0.58	1.56	0.96	52	6.23	39.872	6.23	9.84615					16.64	52		1.69	0.26	0.85	2.29	0.58	1.56	0.96	9.84615	6.23
Orchard 9-1	TR9	1Season	R8	Orch-8	1.68	0.26	0.85	2.3	0.59	1.59	0.94	52	6.23906	39.93	6.23906	9.90476					16.64	52		1.68	0.26	0.85	2.3	0.59	1.59	0.94	9.90476	6.23906
Orchard 9-1	TR9	1Season	R9	Orch-8	1.68	0.26	0.85	2.3	0.59	1.59	0.98	52	6.23	39.872	6.23	9.90476	1Season	Orch-8	9.96544	6.28028	16.64	52		1.68	0.26	0.85	2.3	0.59	1.59	0.98	9.90476	6.23
Orchard 10-1	TR10	1Season	R1	Orch-9	1.42	0.16	0.68	2.08	0.36	1.29	0.69	38	5.15625	33	5.15625	8.56338					12.16	38		1.42	0.16	0.68	2.08	0.36	1.29	0.69	8.56338	5.15625
Orchard 10-1	TR10	1Season	R2	Orch-9	1.43	0.17	0.69	2.06	0.38	1.28	0.68	37	5.17625	33.128	5.17625	8.27972					11.84	37		1.43	0.17	0.69	2.06	0.38	1.28	0.68	8.27972	5.17625
Orchard 10-1	TR10	1Season	R3	Orch-9	1.42	0.17	0.68	2.02	0.38	1.27	0.69	37	5.15625	33	5.15625	8.33803					11.84	37		1.42	0.17	0.68	2.02	0.38	1.27	0.69	8.33803	5.15625
Orchard 10-1	TR10	1Season	R4	Orch-9	1.41	0.18	0.68	2.04	0.36	1.28	0.68	38	5.29125	33.864	5.29125	8.62411					12.16	38		1.41	0.18	0.68	2.04	0.36	1.28	0.68	8.62411	5.29125
Orchard 10-1	TR10	1Season	R5	Orch-9	1.42	0.16	0.68	2.08	0.36	1.29	0.69	38	5.15625	33	5.15625	8.56338					12.16	38		1.42	0.16	0.68	2.08	0.36	1.29	0.69	8.56338	5.15625
Orchard 10-1	TR10	1Season	R6	Orch-9	1.43	0.17	0.69	2.06	0.38	1.28	0.68	37	5.17625	33.128	5.17625	8.27972					11.84	37		1.43	0.17	0.69	2.06	0.38	1.28	0.68	8.27972	5.17625
Orchard 10-1	TR10	1Season	R7	Orch-9	1.42	0.17	0.68	2.07	0.38	1.27	0.69	37	5.15625	33	5.15625	8.33803					11.84	37		1.42	0.17	0.68	2.07	0.38	1.27	0.69	8.33803	5.15625
Orchard 10-1	TR10	1Season	R8	Orch-9	1.41	0.18	0.68	2.04	0.36	1.28	0.68	38	5.29125	33.864	5.29125	8.62411					12.16	38		1.41	0.18	0.68	2.04	0.36	1.28	0.68	8.62411	5.29125
Orchard 10-1	TR10	1Season	R9	Orch-9	1.42	0.17	0.68	2.02	0.39	1.27	0.68	38	5.29125	33.864	5.29125	8.56338	1Season	Orch-9	8.46376	5.20569	12.16	38		1.42	0.17	0.68	2.02	0.39	1.27	0.68	8.56338	5.29125
Orchard 2-1	TR2	2Season	R1	Orch-1	1.84	0.32	0.95	2.55	0.75	1.64	1.18	64	11.8707	75.9726	11.8707	11.1304					20.48	64		1.84	0.32	0.95	2.55	0.75	1.64	1.18	11.1304	11.8707
Orchard 2-1	TR2	2Season	R2	Orch-1	1.82	0.33	0.96	2.57	0.73	1.62	1.19	63	12.0127	76.8812	12.0127	11.0769					20.16	63		1.82	0.33	0.96	2.57	0.73	1.62	1.19	11.0769	12.0127
Orchard 2-1	TR2	2Season	R3	Orch-1	1.85	0.33	0.95	2.54	0.72	1.64	1.22	64	11.7628	75.2817	11.7628	11.0703					20.48	64		1.85	0.33	0.95	2.54	0.72	1.64	1.22	11.0703	11.7628
Orchard 2-1	TR2	2Season	R4	Orch-1	1.83	0.32	0.95	2.53	0.75	1.65	1.23	63	12.0223	76.9428	12.0223	11.0164					20.16	63		1.83	0.32	0.95	2.53	0.75	1.65	1.23	11.0164	12.0223
Orchard 2-1	TR2	2Season	R5	Orch-1	1.84	0.32	0.95	2.55	0.75	1.64	1.18	64	11.8707	75.9726	11.8707	11.1304					20.48	64		1.84	0.32	0.95	2.55	0.75	1.64	1.18	11.1304	11.8707
Orchard 2-1	TR2	2Season	R6	Orch-1	1.82	0.33	0.96	2.57	0.73	1.62	1.19	63	12.0127	76.8812	12.0127	11.0769					20.16	63		1.82	0.33	0.96	2.57	0.73	1.62	1.19	11.0769	12.0127
Orchard 2-1	TR2	2Season	R7	Orch-1	1.85	0.33	0.95	2.54	0.72	1.64	1.22	64	11.7628	75.2817	11.7628	11.0703					20.48	64		1.85	0.33	0.95	2.54	0.72	1.64	1.22	11.0703	11.7628
Orchard 2-1	TR2	2Season	R8	Orch-1	1.83	0.32	0.95	2.53	0.75	1.65	1.23	63	12.0223	76.9428	12.0223	11.0164					20.16	63		1.83	0.32	0.95	2.53	0.75	1.65	1.23	11.0164	12.0223
Orchard 2-1	TR2	2Season	R9	Orch-1	1.85	0.33	0.95	2.54	0.72	1.64	1.22	64	11.7628	75.2817	11.7628	11.0703					20.48	64		1.85	0.33	0.95	2.54	0.72	1.64	1.22	11.0703	11.7628
Orchard 3-1	TR3	2Season	R1	Orch-2	1.53	0.18	0.76	2.15	0.39	1.32	0.85	32	9.8555	63.0752	9.8555	6.69281	2Season	Orch-2	10.5801	11.6761	10.24	32		1.53	0.18	0.76	2.15	0.39	1.32	0.85	6.69281	9.8555
Orchard 3-1	TR3	2Season	R2	Orch-2	1.52	0.17	0.75	2.14	0.38	1.33	0.87	33	9.98006	63.8724	9.98006	6.94737					10.56	33		1.52	0.17	0.75	2.14	0.38	1.33	0.87	6.94737	9.98006
Orchard 3-1	TR3	2Season	R3	Orch-2	1.53	0.18	0.74	2.12	0.38	1.34	0.86	32	9.71425	62.1712	9.71425	6.69281					10.24	32		1.53	0.18	0.74	2.12	0.38	1.34	0.86	6.69281	9.71425
Orchard 3-1	TR3	2Season	R4	Orch-2	1.51	0.17	0.74	2.14	0.39	1.32	0.87	33	9.79344	62.678	9.79344	6.99338					10.56	33		1.51	0.17	0.74	2.14	0.39	1.32	0.87	6.99338	9.79344
Orchard 3-1	TR3	2Season	R5	Orch-2	1.53	0.18	0.76	2.15	0.39	1.32	0.85	33	9.98006	63.8724	9.98006	6.90196					10.56	33		1.53	0.18	0.76	2.15	0.39	1.32	0.85	6.90196	9.98006
Orchard 3-1	TR3	2Season	R6	Orch-2	1.52	0.17	0.75	2.14	0.38	1.33	0.87	32	9.71425	62.1712	9.71425	6.73684					10.24	32		1.52	0.17	0.75	2.14	0.38	1.33	0.87	6.73684	9.71425
Orchard 3-1	TR3	2Season	R7	Orch-2	1.53	0.18	0.74	2.12	0.38	1.34	0.86	33	9.79344	62.678	9.79344	6.90196					10.56	33		1.53	0.18	0.74	2.12	0.38	1.34	0.86	6.90196	9.79344
Orchard 3-1	TR3	2Season	R8	Orch-2	1.51	0.17	0.74	2.14	0.39	1.32	0.87	33	9.79344	62.678	9.79344	6.99338					10.56	33		1.51	0.17	0.74	2.14	0.39	1.32	0.87	6.99338	9.79344
Orchard 3-1	TR3	2Season	R9	Orch-2	1.53	0.18	0.74	2.12	0.38	1.34	0.86	33	9.79344	62.678	9.79344	6.90196					10.56	33		1.53	0.18	0.74	2.12	0.38	1.34	0.86	6.90196	9.79344
Orchard 4-1	TR4	2Season	R1	Orch-3	1.3	0.12	0.45	1.92	0.22	1.16	0.63	20	8.43916	54.0106	8.43916	4.92308	2Season	Orch-3	6.66586	9.66684	6.4	20		1.3	0.12	0.45	1.92	0.22	1.16	0.63	4.92308	8.43916
Orchard 4-1	TR4	2Season	R2	Orch-3	1.31	0.11	0.46	1.93	0.22	1.14	0.62	21	8.41725	53.8704	8.41725	5.12977					6.72	21		1.31	0.11	0.46	1.93	0.22	1.14	0.62	5.12977	8.41725
Orchard 4-1	TR4	2Season	R3	Orch-3	1.31	0.13	0.46	1.93	0.21	1.15	0.63	20	8.26144	52.8732	8.26144	4.8855					6.4	20		1.31	0.13	0.46	1.93	0.21	1.15	0.63	4.8855	8.26144
Orchard 4-1	TR4	2Season	R4	Orch-3	1.3	0.12	0.45	1.92	0.21	1.14	0.62	20	8.49322	54.3566	8.49322	4.92308					6.4	20		1.3	0.12	0.45	1.92	0.21	1.14	0.62	4.92308	8.49322
Orchard 4-1	TR4	2Season	R5	Orch-3	1.31	0.11	0.46	1.93	0.22	1.14	0.62	21	8.41725	53.8704	8.41725	5.12977					6.72	21		1.31	0.11	0.46	1.93	0.22	1.14	0.62	5.12977	8.41725
Orchard 4-1	TR4	2Season	R6	Orch-3	1.31	0.13	0.46	1.93	0.21	1.15	0.63	20	8.26144	52.8732	8.26144	4.8855					6.4	20		1.31	0.13	0.46	1.93	0.21	1.15	0.63	4.8855	8.26144
Orchard 4-1	TR4	2Season	R7	Orch-3	1.3	0.12	0.45	1.92	0.21	1.14	0.62	20	8.49322	54.3566	8.49322	4.92308					6.4	20		1.3	0.12	0.45	1.92	0.21	1.14	0.62	4.92308	8.49322
Orchard 4-1	TR4	2Season	R8	Orch-3	1.31	0.13	0.46	1.93	0.21	1.15	0.63	20	8.26144	52.8732	8.26144	4.8855					6.4	20		1.31	0.13	0.46	1.93	0.21	1.15	0.63	4.8855	8.26144
Orchard 4-1	TR4	2Season	R9	Orch-3	1.3	0.12	0.45	1.92	0.21	1.14	0.62	20	8.26144	52.8732	8.26144	4.92308					6.4	20		1.3	0.12	0.45	1.92	0.21	1.14	0.62	4.92308	8.26144
Orchard 5-1	TR5	2Season	R1	Orch-4	1.75	0.3	0.93	2.46	0.68	1.59	1.12	57	11.6476	74.5448	11.6476	10.4229	2Season	Orch-4	5.56757	8.72381	18.24	57		1.75	0.3	0.93	2.46	0.68	1.59	1.12	10.4229	11.6476
Orchard 5-1	TR5	2Season	R2	Orch-4	1.74	0.29	0.93	2.45	0.66	1.58	1.14	58	11.6418	74.5074	11.6418	10.6667					18.56	58		1.74	0.29	0.93	2.45	0.66	1.58	1.14	10.6667	11.6418
Orchard 5-1	TR5	2Season	R3	Orch-4	1.74	0.28	0.92	2.46	0.69	1.57	1.11	58	11.5793	74.1076	11.5793	10.6667					18.56	58		1.74	0.28	0.92	2.46	0.69	1.57	1.11	10.6667	11.5793
Orchard 5-1	TR5	2Season	R4	Orch-4	1.76	0.3	0.92	2.47	0.68	1.58	1.14	57	11.6781	74.74	11.6781	10.3636					18.24	57		1.76	0.3	0.92	2.47	0.68	1.58	1.14	10.3636	11.6781
Orchard 5-1	TR5	2Season	R5	Orch-4	1.74	0.29	0.93	2.45	0.66	1.58	1.14	58	11.5793	74.1076	11.5793	10.6667					18.56	58		1.74	0.29	0.93	2.45	0.66	1.58	1.14	10.6667	11.5793
Orchard 5-1	TR5	2Season	R6	Orch-4	1.74	0.28	0.92	2.46	0.69	1.57	1.11	57	11.6781	74.74	11.6781	10.4828					18.24	57		1.74	0.28	0.92	2.46	0.69	1.57	1.11	10.4828	11.6781
Orchard 5-1	TR5	2Season	R7	Orch-4	1.76	0.3	0.92	2.47	0.68	1.58	1.14	58	11.5793	74.1076	11.5793	10.5455					18.56	58		1.76	0.3	0.92	2.47	0.68	1.58	1.14	10.5455	11.5793
Orchard 5-1	TR5	2Season	R8	Orch-4	1.74	0.29	0.93	2.45	0.66	1.58	1.14	57	11.6781	74.74	11.6781	10.4828					18.24	57		1.74	0.29	0.93	2.45	0.66	1.58	1.14	10.4828	11.6781
Orchard 5-1	TR5	2Season	R9	Orch-4	1.74	0.28	0.92	2.46	0.69	1.57	1.11	57	11.6781	74.74	11.6781	10.4828	2Season	Orch-4	10.5311	11.6378	18.24	57		1.74	0.28	0.92	2.46	0.69	1.57	1.11	10.4828	11.6781
Orchard 6-1	TR6	2Season	R1	Orch-5	1.7	0.27	0.92	2.35	0.62	1.52	1.07	48	11.2035	71.7024	11.2035	9.03529					15.36	48		1.7	0.27	0.92	2.35	0.62	1.52	1.07	9.03529	11.2035
Orchard 6-1	TR6	2Season	R2	Orch-5	1.72	0.26	0.9	2.36	0.63	1.51	1.08	49	11.0723	70.863	11.0723	9.11628					15.68	49		1.72	0.26	0.9	2.36	0.63	1.51	1.08	9.11628	11.0723
Orchard 6-1	TR6	2Season	R3	Orch-5	1.71	0.28	0.9	2.34	0.64	1.51	1.06	47	11.1668	71.4675	11.1668	8.79532					15.04	47		1.71	0.28	0.9	2.34	0.64	1.51	1.06	8.79532	11.1668
Orchard 6-1	TR6	2Season	R4	Orch-5	1.72	0.26	0.9	2.33	0.62	1.53	1.08	48	11.1628	71.442	11.1628	8.93023					15.36	48		1.72	0.26	0.9	2.33	0.62	1.53	1.08	8.93023	11.1628
Orchard 6-1	TR6	2Season	R5	Orch-5	1.71	0.28	0.9	2.34	0.64	1.51	1.06	49	11.0723	70.863	11.0723	9.16959					15.68	49		1.71	0.28	0.9	2.34	0.64	1.51	1.06	9.16959	11.0723
Orchard 6-1	TR6	2Season	R6	Orch-5	1.72	0.26	0.9	2.33	0.62	1.53	1.08	47	11.1668	71.4675	11.1668	8.74419					15.04	47		1.72	0.26	0.9	2.33	0.62	1.53	1.08	8.74419	11.1668
Orchard 6-1	TR6	2Season	R7	Orch-5	1.71	0.28	0.9	2.34	0.64	1.51	1.06	48	11.1628	71.442	11.1628	8.98246					15.36	48		1.71	0.28	0.9	2.34	0.64	1.51	1.06	8.98246	11.1628
Orchard 6-1	TR6	2Season	R8	Orch-5	1.72	0.26	0.9	2.33	0.62	1.53	1.08	47	11.1668	71.4675	11.1668	8.74419					15.04	47		1.72	0.26	0.9	2.33	0.62	1.53	1.08	8.74419	11.1668
Orchard 6-1	TR6	2Season	R9	Orch-5	1.71	0.28	0.9	2.34	0.64	1.51	1.07	48	11.1628	71.442	11.1628	8.98246	2Season	Orch-5	8.94444	11.1486	15.36	48		1.71	0.28	0.9	2.34	0.64	1.51	1.07	8.98246	11.1628
Orchard 7-1	TR7	2Season	R1	Orch-6	1.63	0.22	0.85	2.27	0.55	1.44	1	44	10.671	68.2944	10.671	8.63804					14.08	44		1.63	0.22	0.85	2.27	0.55	1.44	1	8.63804	10.671
Orchard 7-1	TR7	2Season	R2	Orch-6	1.64	0.21	0.86	2.28	0.54	1.46	1.01	44	10.7579	68.8506	10.7579	8.58537					14.08	44		1.64	0.21	0.86	2.28	0.54	1.46	1.01	8.58537	10.7579
Orchard 7-1	TR7	2Season	R3	Orch-6	1.62	0.21	0.85	2.29	0.54	1.46	1.01	43	10.6393	68.0915	10.6393	8.49383					13.76	43		1.62	0.21	0.85	2.29	0.54	1.46	1.01	8.49383	10.6393
Orchard 7-1	TR7	2Season	R4	Orch-6	1.63	0.23	0.85	2.27	0.55	1.45	1	43	10.811	69.1905	10.811	8.44172					13.76	43		1.63	0.23	0.85	2.27	0.55	1.45	1	8.44172	10.811
Orchard 7-1	TR7	2Season	R5	Orch-6	1.63	0.22	0.85	2.27	0.55	1.44	1	44	10.671	68.2944	10.671	8.63804					14.08	44		1.63	0.22	0.85	2.27	0.55	1.44	1	8.63804	10.671
Orchard 7-1	TR7	2Season	R6	Orch-6	1.64	0.21	0.86	2.28	0.54	1.46	1.01	44	10.7579	68.8506	10.7579	8.58537					14.08	44		1.64	0.21	0.86	2.28	0.54	1.46	1.01	8.58537	10.7579
Orchard 7-1	TR7	2Season	R7	Orch-6	1.62	0.21	0.85	2.29	0.54	1.46	1.01	43	10.6393	68.0915	10.6393	8.49383					13.76	43		1.62	0.21	0.85	2.29	0.54	1.46	1.01	8.49383	10.6393
Orchard 7-1	TR7	2Season	R8	Orch-6	1.63	0.23	0.85	2.27	0.55	1.45	1	43	10.811	69.1905	10.811	8.44172					13.76	43		1.63	0.23	0.85	2.27	0.55	1.45	1	8.44172	10.811
Orchard 7-1	TR7	2Season	R9	Orch-6	1.62	0.21	0.85	2.29	0.54	1.46	1.01	43	10.6393	68.0915	10.6393	8.49383	2Season	Orch-6	8.53464	10.7109	13.76	43		1.62	0.21	0.85	2.29	0.54	1.46	1.01	8.49383	10.6393
Orchard 8-1	TR8	2Season	R1	Orch-7	1.43	0.15	0.68	2.08	0.31	1.27	0.78	28	9.43312	60.372	9.43312	6.26573					8.96	28		1.43	0.15	0.68	2.08	0.31	1.27	0.78	6.26573	9.43312
Orchard 8-1	TR8	2Season	R2	Orch-7	1.44	0.17	0.69	2.06	0.32	1.28	0.76	27	9.58912	61.3704	9.58912	6					8.64	27		1.44	0.17	0.69	2.06	0.32	1.28	0.76	6	9.58912
Orchard 8-1	TR8	2Season	R3	Orch-7	1.43	0.16	0.68	2.04	0.31	1.26	0.76	29	9.39503	60.1282	9.39503	6.48951					9.28	29		1.43	0.16	0.68	2.04	0.31	1.26	0.76	6.48951	9.39503
Orchard 8-1	TR8	2Season	R4	Orch-7	1.42	0.17	0.68	2.08	0.31	1.26	0.78	28	9.45881	60.5364	9.45881	6.30986					8.96	28		1.42	0.17	0.68	2.08	0.31	1.26	0.78	6.30986	9.45881
Orchard 8-1	TR8	2Season	R5	Orch-7	1.44	0.17	0.69	2.06	0.32	1.28	0.76	28	9.43312	60.372	9.43312	6.22222					8.96	28		1.44	0.17	0.69	2.06	0.32	1.28	0.76	6.22222	9.43312
Orchard 8-1	TR8	2Season	R6	Orch-7	1.43	0.16	0.68	2.04	0.31	1.26	0.76	27	9.58912	61.3704	9.58912	6.04196					8.64	27		1.43	0.16	0.68	2.04	0.31	1.26	0.76	6.04196	9.58912
Orchard 8-1	TR8	2Season	R7	Orch-7	1.42	0.17	0.68	2.08	0.31	1.26	0.78	29	9.39503	60.1282	9.39503	6.53521					9.28	29		1.42	0.17	0.68	2.08	0.31	1.26	0.78	6.53521	9.39503
Orchard 8-1	TR8	2Season	R8	Orch-7	1.43	0.16	0.68	2.04	0.31	1.26	0.76	28	9.45881	60.5364	9.45881	6.26573					8.96	28		1.43	0.16	0.68	2.04	0.31	1.26	0.76	6.26573	9.45881
Orchard 8-1	TR8	2Season	R9	Orch-7	1.42	0.17	0.68	2.08	0.31	1.26	0.78	28	9.45881	60.5364	9.45881	6.30986	2Season	Orch-7	6.27112	9.46789	8.96	28		1.42	0.17	0.68	2.08	0.31	1.26	0.78	6.30986	9.45881
Orchard 9-1	TR9	2Season	R1	Orch-8	1.55	0.2	0.82	2.18	0.48	1.38	0.94	37	10.137	64.8768	10.137	7.63871					11.84	37		1.55	0.2	0.82	2.18	0.48	1.38	0.94	7.63871	10.137
Orchard 9-1	TR9	2Season	R2	Orch-8	1.58	0.21	0.81	2.22	0.46	1.37	0.95	38	10.2607	65.6684	10.2607	7.6962					12.16	38		1.58	0.21	0.81	2.22	0.46	1.37	0.95	7.6962	10.2607
Orchard 9-1	TR9	2Season	R3	Orch-8	1.57	0.19	0.81	2.21	0.48	1.39	0.96	38	10.0131	64.084	10.0131	7.74522					12.16	38		1.57	0.19	0.81	2.21	0.48	1.39	0.96	7.74522	10.0131
Orchard 9-1	TR9	2Season	R4	Orch-8	1.56	0.21	0.82	2.21	0.46	1.39	0.93	37	10.2996	65.9175	10.2996	7.58974					11.84	37		1.56	0.21	0.82	2.21	0.46	1.39	0.93	7.58974	10.2996
Orchard 9-1	TR9	2Season	R5	Orch-8	1.58	0.21	0.81	2.22	0.46	1.37	0.95	38	10.2607	65.6684	10.2607	7.6962					12.16	38		1.58	0.21	0.81	2.22	0.46	1.37	0.95	7.6962	10.2607
Orchard 9-1	TR9	2Season	R6	Orch-8	1.57	0.19	0.81	2.21	0.48	1.39	0.96	38	10.0131	64.084	10.0131	7.74522					12.16	38		1.57	0.19	0.81	2.21	0.48	1.39	0.96	7.74522	10.0131
Orchard 9-1	TR9	2Season	R7	Orch-8	1.56	0.21	0.82	2.21	0.46	1.39	0.93	37	10.2996	65.9175	10.2996	7.58974					11.84	37		1.56	0.21	0.82	2.21	0.46	1.39	0.93	7.58974	10.2996
Orchard 9-1	TR9	2Season	R8	Orch-8	1.57	0.19	0.81	2.21	0.48	1.39	0.96	38	10.0131	64.084	10.0131	7.74522					12.16	38		1.57	0.19	0.81	2.21	0.48	1.39	0.96	7.74522	10.0131
Orchard 9-1	TR9	2Season	R9	Orch-8	1.56	0.21	0.82	2.21	0.46	1.39	0.93	37	10.2996	65.9175	10.2996	7.58974	2Season	Orch-8	7.67067	10.1774	11.84	37		1.56	0.21	0.82	2.21	0.46	1.39	0.93	7.58974	10.2996
Orchard 10-1	TR10	2Season	R1	Orch-9	1.38	0.14	0.57	2.01	0.27	1.25	0.69	24	8.92781	57.138	8.92781	5.56522					7.68	24		1.38	0.14	0.57	2.01	0.27	1.25	0.69	5.56522	8.92781
Orchard 10-1	TR10	2Season	R2	Orch-9	1.38	0.13	0.56	2.01	0.28	1.22	0.69	23	9.01594	57.702	9.01594	5.33333					7.36	23		1.38	0.13	0.56	2.01	0.28	1.22	0.69	5.33333	9.01594
Orchard 10-1	TR10	2Season	R3	Orch-9	1.39	0.15	0.57	2	0.28	1.23	0.69	22	8.855	56.672	8.855	5.06475					7.04	22		1.39	0.15	0.57	2	0.28	1.23	0.69	5.06475	8.855
Orchard 10-1	TR10	2Season	R4	Orch-9	1.38	0.14	0.55	2.01	0.26	1.23	0.68	23	8.745	55.968	8.745	5.33333					7.36	23		1.38	0.14	0.55	2.01	0.26	1.23	0.68	5.33333	8.745
Orchard 10-1	TR10	2Season	R5	Orch-9	1.38	0.14	0.57	2.01	0.27	1.25	0.69	24	8.92781	57.138	8.92781	5.56522					7.68	24		1.38	0.14	0.57	2.01	0.27	1.25	0.69	5.56522	8.92781
Orchard 10-1	TR10	2Season	R6	Orch-9	1.38	0.13	0.56	2.01	0.28	1.22	0.69	23	9.01594	57.702	9.01594	5.33333					7.36	23		1.38	0.13	0.56	2.01	0.28	1.22	0.69	5.33333	9.01594
Orchard 10-1	TR10	2Season	R7	Orch-9	1.39	0.15	0.57	2	0.28	1.23	0.69	22	8.855	56.672	8.855	5.06475					7.04	22		1.39	0.15	0.57	2	0.28	1.23	0.69	5.06475	8.855
Orchard 10-1	TR10	2Season	R8	Orch-9	1.38	0.14	0.55	2.01	0.26	1.23	0.68	23	8.745	55.968	8.745	5.33333					7.36	23		1.38	0.14	0.55	2.01	0.26	1.23	0.68	5.33333	8.745
Orchard 10-1	TR10	2Season	R9	Orch-9	1.39	0.15	0.57	2	0.28	1.23	0.69	23	8.745	55.968	8.745	5.29496	2Season	Orch-9	5.32091	8.87028	7.36	23		1.39	0.15	0.57	2	0.28	1.23	0.69	5.29496	8.745
					N	P	K	Ca	Mg	Chla	Chlb	Carbohydrate		yield kg	ton/ha	C/N								N	P	K	Ca	Mg	Chla	Chlb	Carbohydrate	Yield
				min	1.32	0.15	0.55	1.94	0.26	1.13	0.61	31		29.83	4.66094	7.34815					9.92			1.32	0.15	0.55	1.94	0.26	1.13	0.61	7.34815	4.66094
				max	1.99151	0.389802	0.99	2.73	0.801572	1.92	1.31266	79		52.2838	8.16935	12.7677					25.28			1.99151	0.389802	0.99	2.73	0.801572	1.92	1.31266	12.7677	8.16935
				mean	1.67557	0.256701	0.823775	2.32883	0.558004	1.5625	0.95554	54.1078		40.763	6.36922	10.128					17.3145			1.67557	0.256701	0.823775	2.32883	0.558004	1.5625	0.95554	10.128	6.36922
			O	SD	0.210687	0.0705296	0.130643	0.252033	0.173611	0.252417	0.227781	15.4969		7.06675	1.10418	1.69232				O	4.95902			0.210687	0.0705296	0.130643	0.252033	0.173611	0.252417	0.227781	1.69232	1.10418
				count	81	81	81	81	81	81	81	81		81	81	81					81			81	81	81	81	81	81	81	81	81
				min	1.3	0.11	0.45	1.92	0.21	1.14	0.62	20		52.8732	8.26144	4.8855					6.4			1.3	0.11	0.45	1.92	0.21	1.14	0.62	4.8855	8.26144
				max	1.85	0.33	0.96	2.57	0.75	1.65	1.23	64		76.9428	12.0223	11.1304					20.48			1.85	0.33	0.96	2.57	0.75	1.65	1.23	11.1304	12.0223
				mean	1.57025	0.211852	0.765926	2.21815	0.470988	1.3937	0.922222	39.3086		65.4963	10.2338	7.79612					12.5788			1.57025	0.211852	0.765926	2.21815	0.470988	1.3937	0.922222	7.79612	10.2338
			first	SD	0.168834	0.0669535	0.161994	0.19758	0.178056	0.157833	0.191102	14.2922		7.43074	1.16105	2.05692				first	4.57349			0.168834	0.0669535	0.161994	0.19758	0.178056	0.157833	0.191102	2.05692	1.16105
				count	81	81	81	81	81	81	81	81		81	81	81					81			81	81	81	81	81	81	81	81	81
					C/N	yield (ton/ha)	C/N (OFF Season)	Yield (OFF Season)
			1Season	Orch-1	12.5399	8.11302								First season (OFF year )	Second season (ON year)
			1Season	Orch-2	9.20423	5.81078							Yield	6.36922	10.231
			1Season	Orch-3	7.70022	4.74517							C/N	10.128	7.78738
			1Season	Orch-4	12.4284	7.65071
			1Season	Orch-5	11.6417	7.3501
			1Season	Orch-6	10.5458	6.67038
			1Season	Orch-7	8.66249	5.49688
		second	1Season	Orch-8	9.96544	6.28028
			1Season	Orch-9	8.46376	5.20569	10.128	6.36922
			2Season	Orch-2	10.5801	11.6761	C/N (ON Season)	Yield (ON Season)
			2Season	Orch-3	6.66586	9.66684
			2Season	Orch-4	5.56757	8.72381
		first	2Season	Orch-4	10.5311	11.6378
			2Season	Orch-5	8.94444	11.1486
			2Season	Orch-6	8.53464	10.7109
			2Season	Orch-7	6.27112	9.46789
			2Season	Orch-8	7.67067	10.1774
			2Season	Orch-9	5.32091	8.87028	7.78738	10.231

## Sheet: Sheet1 (2)
	N	P	K	Ca	Mg	Cu	Fe	Mn	B	Zn	Chla	Chlb	Carotenoids	Carbohydrate	yield kg			F.weight	Total Chl	No.fruit		Fruit set	F. retention	F. drop
	Y1	Y2	Y3	Y4	Y5	Y6	Y7	Y8	Y9	Y10	Y11	Y12	Y14	Y15	Y21/tree			Y20	Y13	Y19		Y16	Y17	Y18
	1.99	0.35	0.98	2.73	0.78	22	194	98	30	120	1.89	1.3	0.96	78	52.14			395	3.19	132		9	26	74
	1.98	0.36	0.99	2.72	0.79	22	188	96	28	119	1.91	1.3	0.95	79	52.26			390	3.21	134		9	25.1111	74.8889
	1.98	0.37	0.98	2.7	0.79	24	192	98	28	122	1.92	1.28	0.94	77	51.87			399	3.2	130		10	23.1	76.9
	1.97	0.34	0.98	2.71	0.78	23	194	97	29	119	1.92	1.27	0.94	78	52.136			392	3.19	133		9	25	75
	1.9747	0.35185	0.988819	2.70733	0.79405	21.3393	189.761	98.4215	30.1232	120.012	1.90828	1.31093	0.94686	78.5564	52.2838			397.528	3.21921	131.522		9.54723	25.982	74.018
	1.98437	0.361239	0.984374	2.69543	0.794064	23.9853	194.831	97.2069	30.8796	119.571	1.91237	1.28537	0.94758	77.3353	51.8591			397.442	3.19774	130.482		9.26486	23.7977	76.2023
	1.9846	0.370298	0.977756	2.71852	0.788089	23.6007	193.6	96.5692	28.0131	121.279	1.89765	1.29573	0.957434	78.5873	51.1577			388.842	3.19339	131.564		8.79417	21.3506	78.6494
	1.99151	0.339592	0.972336	2.6979	0.790544	22.0872	195.083	96.1418	27.9854	117.917	1.91327	1.31266	0.963675	75.8034	51.3713			387.184	3.22592	132.68		9.68228	23.8452	76.1548
	1.97583	0.389802	0.972473	2.71597	0.801572	23.5974	192.244	96.5523	29.5001	121.282	1.91099	1.27408	0.937963	76.4475	52.232			394.203	3.18507	132.5		9.03873	23.8975	76.1025
	1.55	0.21	0.82	2.18	0.49	13	148	57	14	81	1.48	0.85	0.63	45	37.584			348	2.33	108		5	18.8	81.2
	1.59	0.22	0.81	2.22	0.48	12	147	58	14	81	1.47	0.87	0.63	46	36.676			346	2.34	106		6	18.6667	81.3333
	1.6	0.22	0.81	2.21	0.48	13	147	59	15	80	1.49	0.84	0.62	46	36.435			347	2.33	105		6	19	81
	1.6	0.24	0.82	2.21	0.47	13	149	57	15	82	1.49	0.88	0.62	45	37.236			348	2.37	107		5	18.4	81.6
	1.56	0.23	0.82	2.18	0.49	12	148	57	14	81	1.47	0.85	0.63	45	37.584			348	2.32	108		5	18.8	81.2
	1.57	0.21	0.81	2.22	0.47	12	147	59	13	80	1.48	0.87	0.63	45	37.714			346	2.35	109		6	18.8667	81.1333
	1.62	0.22	0.81	2.24	0.49	11	146	60	15	82	1.46	0.85	0.62	47	36.33			346	2.31	105		6	19	81
	1.61	0.23	0.8	2.23	0.47	12	147	57	14	81	1.5	0.89	0.62	45	37.692			349	2.39	108		5	18.5	81.5
	1.59	0.24	0.79	2.19	0.5	13	149	58	15	81	1.48	0.85	0.61	47	37.45			350	2.33	107		6	18.48	81.52
	1.32	0.17	0.57	1.98	0.28	7	122	28	10	58	1.16	0.61	0.45	32	30.943			319	1.77	97		4	16	84
	1.35	0.16	0.56	1.96	0.27	8	123	29	9	60	1.15	0.62	0.44	33	30.24			315	1.77	96		3	16	84
	1.35	0.16	0.55	1.94	0.26	7	124	31	9	59	1.13	0.61	0.45	31	29.83			314	1.74	95		4	15.5	84.5
	1.32	0.15	0.55	1.94	0.26	8	125	28	10	58	1.14	0.62	0.44	32	30.528			318	1.76	96		4	16.5	83.5
	1.32	0.17	0.57	1.98	0.28	7	122	28	10	58	1.16	0.61	0.45	32	30.943			319	1.77	97		4	16	84
	1.35	0.16	0.56	1.96	0.27	8	123	29	9	60	1.15	0.62	0.44	33	30.24			315	1.77	96		3	16	84
	1.32	0.16	0.57	1.94	0.26	7	126	30	11	59	1.15	0.61	0.45	31	29.83			314	1.76	95		4	15.5	84.5
	1.33	0.17	0.55	1.95	0.29	6	125	28	10	60	1.14	0.61	0.44	32	30.528			318	1.75	96		4	16.5	83.5
	1.35	0.18	0.58	1.97	0.28	7	122	31	10	60	1.15	0.62	0.44	33	30.24			315	1.77	96		3	16	84
	1.92	0.34	0.96	2.64	0.75	20	185	90	25	112	1.85	1.22	0.87	73	49.664			388	3.07	128		8	23.5	76.5
	1.92	0.33	0.95	2.65	0.76	20	186	91	26	114	1.86	1.21	0.86	74	48.636			386	3.07	126		8	23.75	76.25
	1.91	0.33	0.94	2.66	0.76	21	187	92	27	114	1.87	1.23	0.85	75	49.02			380	3.1	129		8	23.75	76.25
	1.9	0.34	0.94	2.62	0.75	21	186	90	26	112	1.85	1.24	0.85	74	48.895			385	3.09	127		9	23.4444	76.5556
	1.92	0.33	0.95	2.65	0.76	20	186	91	26	114	1.86	1.21	0.86	74	48.636			386	3.07	126		8	23.75	76.25
	1.91	0.33	0.94	2.66	0.76	21	187	92	27	114	1.87	1.23	0.85	75	49.02			380	3.1	129		8	23.75	76.25
	1.9	0.34	0.94	2.62	0.75	21	186	90	26	112	1.85	1.24	0.85	74	48.895			385	3.09	127		9	23.4444	76.5556
	1.9	0.34	0.94	2.62	0.75	21	186	90	26	112	1.85	1.24	0.85	75	49.02			380	3.09	129		8	23.75	76.25
	1.92	0.33	0.95	2.65	0.76	20	186	91	26	114	1.86	1.21	0.85	74	48.895			385	3.07	127		9	23.4444	76.5556
	1.84	0.34	0.93	2.55	0.71	18	179	86	24	105	1.78	1.15	0.82	68	46.996			379	2.93	124		7	22.5714	77.4286
	1.83	0.32	0.93	2.57	0.72	19	179	85	25	104	1.76	1.15	0.81	66	46.875			375	2.91	125		7	22.8571	77.1429
	1.85	0.33	0.92	2.54	0.71	18	178	84	24	106	1.78	1.14	0.81	67	47.376			376	2.92	126		8	22.125	77.875
	1.86	0.32	0.92	2.53	0.73	19	180	86	25	105	1.79	1.14	0.82	68	46.748			377	2.93	124		8	22.75	77.25
	1.83	0.32	0.93	2.57	0.72	19	179	85	25	104	1.76	1.15	0.81	67	47.376			376	2.91	126		8	22.125	77.875
	1.85	0.33	0.92	2.54	0.71	18	178	84	24	106	1.78	1.14	0.82	68	46.748			377	2.92	124		8	22.75	77.25
	1.86	0.32	0.92	2.53	0.73	19	180	86	25	105	1.79	1.14	0.82	68	46.996			379	2.93	124		7	22.5714	77.4286
	1.85	0.33	0.92	2.54	0.71	18	178	84	24	106	1.78	1.14	0.81	66	46.875			375	2.92	125		7	22.8571	77.1429
	1.86	0.32	0.92	2.53	0.73	19	180	86	25	105	1.79	1.14	0.81	67	47.376			376	2.93	126		8	22.125	77.875
	1.75	0.28	0.92	2.41	0.62	17	163	78	19	98	1.69	1.05	0.76	58	43.07			365	2.74	118		6	21	79
	1.77	0.3	0.9	2.43	0.64	16	162	76	20	99	1.67	1.03	0.75	59	42.688			368	2.7	116		6	21.3333	78.6667
	1.77	0.29	0.9	2.41	0.63	16	164	77	19	96	1.66	1.06	0.74	57	42.939			367	2.72	117		7	20.2857	79.7143
	1.76	0.27	0.9	2.4	0.65	17	163	76	18	99	1.67	1.05	0.74	58	42.066			369	2.72	114		7	20.4286	79.5714
	1.75	0.28	0.92	2.41	0.62	17	163	78	19	98	1.69	1.05	0.76	58	43.07			365	2.74	118		6	21	79
	1.77	0.3	0.9	2.43	0.64	16	162	76	20	99	1.67	1.03	0.75	59	42.688			368	2.7	116		6	21.3333	78.6667
	1.77	0.29	0.9	2.41	0.63	16	164	77	19	96	1.66	1.06	0.74	57	42.939			367	2.72	117		7	20.2857	79.7143
	1.76	0.27	0.9	2.4	0.65	17	163	76	18	99	1.67	1.05	0.74	58	42.066			369	2.72	114		7	20.4286	79.5714
	1.77	0.29	0.9	2.41	0.63	16	164	77	19	96	1.66	1.06	0.75	59	42.688			368	2.72	116		6	21.3333	78.6667
	1.55	0.2	0.76	2.15	0.42	11	139	43	12	73	1.36	0.79	0.57	41	35.152			338	2.15	104		5	17.2	82.8
	1.54	0.19	0.75	2.14	0.42	10	138	45	13	73	1.37	0.77	0.58	43	35.02			340	2.14	103		5	17.6	82.4
	1.53	0.19	0.74	2.12	0.41	10	135	46	12	72	1.36	0.77	0.56	41	35.722			337	2.13	106		4	17	83
	1.55	0.18	0.74	2.14	0.41	11	136	46	13	74	1.36	0.78	0.57	42	34.944			336	2.14	104		5	16.4	83.6
	1.55	0.2	0.76	2.15	0.42	11	139	43	12	73	1.36	0.79	0.57	41	35.152			338	2.15	104		5	17.2	82.8
	1.54	0.19	0.75	2.14	0.42	10	138	45	13	73	1.37	0.77	0.58	43	35.02			340	2.14	103		5	17.6	82.4
	1.53	0.19	0.74	2.12	0.41	10	135	46	12	72	1.36	0.77	0.56	41	35.722			337	2.13	106		4	17	83
	1.55	0.18	0.74	2.14	0.41	11	136	46	13	74	1.36	0.78	0.57	42	34.944			336	2.14	104		5	16.4	83.6
	1.55	0.2	0.76	2.15	0.42	11	139	43	12	73	1.36	0.79	0.57	42	34.944			336	2.15	104		5	16.4	83.6
	1.7	0.25	0.87	2.3	0.58	14	155	71	18	91	1.58	0.94	0.68	54	40.68			360	2.52	113		7	18.8571	81.1429
	1.7	0.25	0.86	2.28	0.57	15	158	69	16	91	1.57	0.95	0.69	53	40.454			358	2.52	113		5	20.4	79.6
	1.69	0.26	0.85	2.29	0.58	15	155	70	17	90	1.56	0.96	0.68	52	39.872			356	2.52	112		6	19.6667	80.3333
	1.68	0.26	0.85	2.3	0.59	14	156	69	17	89	1.59	0.94	0.68	52	39.93			363	2.53	110		6	20.3333	79.6667
	1.7	0.25	0.87	2.3	0.58	14	155	71	18	91	1.58	0.94	0.68	54	40.68			360	2.52	113		7	18.8571	81.1429
	1.7	0.25	0.86	2.28	0.57	15	158	69	16	91	1.57	0.95	0.69	53	40.454			358	2.52	113		5	20.4	79.6
	1.69	0.26	0.85	2.29	0.58	15	155	70	17	90	1.56	0.96	0.68	52	39.872			356	2.52	112		6	19.6667	80.3333
	1.68	0.26	0.85	2.3	0.59	14	156	69	17	89	1.59	0.94	0.68	52	39.93			363	2.53	110		6	20.3333	79.6667
	1.68	0.26	0.85	2.3	0.59	14	156	69	17	89	1.59	0.98	0.68	52	39.872			356	2.57	112		6	19.6667	80.3333
	1.42	0.16	0.68	2.08	0.36	9	130	39	11	66	1.29	0.69	0.52	38	33			330	1.98	100		4	16.5	83.5
	1.43	0.17	0.69	2.06	0.38	9	131	38	10	67	1.28	0.68	0.53	37	33.128			328	1.96	101		4	15.5	84.5
	1.42	0.17	0.68	2.02	0.38	8	129	37	12	66	1.27	0.69	0.51	37	33			330	1.96	100		5	16.4	83.6
	1.41	0.18	0.68	2.04	0.36	9	131	39	12	67	1.28	0.68	0.52	38	33.864			332	1.96	102		5	16.8	83.2
	1.42	0.16	0.68	2.08	0.36	9	130	39	11	66	1.29	0.69	0.52	38	33			330	1.98	100		4	16.5	83.5
	1.43	0.17	0.69	2.06	0.38	9	131	38	10	67	1.28	0.68	0.53	37	33.128			328	1.96	101		4	15.5	84.5
	1.42	0.17	0.68	2.07	0.38	8	129	37	12	66	1.27	0.69	0.51	37	33			330	1.96	100		5	16.4	83.6
	1.41	0.18	0.68	2.04	0.36	9	131	39	12	67	1.28	0.68	0.52	38	33.864			332	1.96	102		5	16.8	83.2
	1.42	0.17	0.68	2.02	0.39	8	131	37	12	66	1.27	0.68	0.54	38	33.864			332	1.95	102		5	16.8	83.2
	1.84	0.32	0.95	2.55	0.75	21	165	75	26	114	1.64	1.18	0.86	64	75.9726			383.7	2.82	198		10	27.2	72.8
	1.82	0.33	0.96	2.57	0.73	21	167	76	27	112	1.62	1.19	0.88	63	76.8812			380.6	2.81	202		9	29.3333	70.6667
	1.85	0.33	0.95	2.54	0.72	20	168	78	27	110	1.64	1.22	0.86	64	75.2817			378.3	2.86	199		11	26.2727	73.7273
	1.83	0.32	0.95	2.53	0.75	20	166	76	26	112	1.65	1.23	0.85	63	76.9428			382.8	2.88	201		10	27.6	72.4
	1.84	0.32	0.95	2.55	0.75	21	165	75	26	114	1.64	1.18	0.86	64	75.9726			383.7	2.82	198		10	27.2	72.8
	1.82	0.33	0.96	2.57	0.73	21	167	76	27	112	1.62	1.19	0.88	63	76.8812			380.6	2.81	202		9	29.3333	70.6667
	1.85	0.33	0.95	2.54	0.72	20	168	78	27	110	1.64	1.22	0.86	64	75.2817			378.3	2.86	199		11	26.2727	73.7273
	1.83	0.32	0.95	2.53	0.75	20	166	76	26	112	1.65	1.23	0.85	63	76.9428			382.8	2.88	201		10	27.6	72.4
	1.85	0.33	0.95	2.54	0.72	20	168	78	27	110	1.64	1.22	0.89	64	75.2817			378.3	2.86	199		11	26.2727	73.7273
	1.53	0.18	0.76	2.15	0.39	11	133	44	14	80	1.32	0.85	0.57	32	63.0752			342.8	2.17	184		6	19	81
	1.52	0.17	0.75	2.14	0.38	12	136	45	13	81	1.33	0.87	0.58	33	63.8724			343.4	2.2	186		6	19.6667	80.3333
	1.53	0.18	0.74	2.12	0.38	11	134	43	14	78	1.34	0.86	0.56	32	62.1712			341.6	2.2	182		6	19.3333	80.6667
	1.51	0.17	0.74	2.14	0.39	11	134	44	15	82	1.32	0.87	0.57	33	62.678			338.8	2.19	185		7	18.2857	81.7143
	1.53	0.18	0.76	2.15	0.39	11	133	44	14	80	1.32	0.85	0.58	33	63.8724			343.4	2.17	186		6	19.6667	80.3333
	1.52	0.17	0.75	2.14	0.38	12	136	45	13	81	1.33	0.87	0.56	32	62.1712			341.6	2.2	182		6	19.3333	80.6667
	1.53	0.18	0.74	2.12	0.38	11	134	43	14	78	1.34	0.86	0.57	33	62.678			338.8	2.2	185		7	18.2857	81.7143
	1.51	0.17	0.74	2.14	0.39	11	134	44	15	82	1.32	0.87	0.57	33	62.678			338.8	2.19	185		7	18.2857	81.7143
	1.53	0.18	0.74	2.12	0.38	11	134	43	14	78	1.34	0.86	0.57	33	62.678			338.8	2.2	185		7	18.2857	81.7143
	1.3	0.12	0.45	1.92	0.22	8	112	20	9	58	1.16	0.63	0.41	20	54.0106			312.2	1.79	173		4	17	83
	1.31	0.11	0.46	1.93	0.22	8	113	21	9	60	1.14	0.62	0.41	21	53.8704			313.2	1.76	172		5	16.8	83.2
	1.31	0.13	0.46	1.93	0.21	7	112	22	10	57	1.15	0.63	0.42	20	52.8732			309.2	1.78	171		5	16	84
	1.3	0.12	0.45	1.92	0.21	8	114	20	10	59	1.14	0.62	0.42	20	54.3566			314.2	1.76	173		5	16.4	83.6
	1.31	0.11	0.46	1.93	0.22	8	113	21	9	60	1.14	0.62	0.41	21	53.8704			313.2	1.76	172		5	16.8	83.2
	1.31	0.13	0.46	1.93	0.21	7	112	22	10	57	1.15	0.63	0.42	20	52.8732			309.2	1.78	171		5	16	84
	1.3	0.12	0.45	1.92	0.21	8	114	20	10	59	1.14	0.62	0.42	20	54.3566			314.2	1.76	173		5	16.4	83.6
	1.31	0.13	0.46	1.93	0.21	7	112	22	10	57	1.15	0.63	0.42	20	52.8732			309.2	1.78	171		5	16	84
	1.3	0.12	0.45	1.92	0.21	8	114	20	10	59	1.14	0.62	0.42	20	52.8732			309.2	1.76	171		5	16	84
	1.75	0.3	0.93	2.46	0.68	19	160	73	25	106	1.59	1.12	0.8	57	74.5448			378.4	2.71	197		9	26.4444	73.5556
	1.74	0.29	0.93	2.45	0.66	18	162	73	23	110	1.58	1.14	0.81	58	74.5074			376.3	2.72	198		9	26.2222	73.7778
	1.74	0.28	0.92	2.46	0.69	19	159	72	24	108	1.57	1.11	0.82	58	74.1076			372.4	2.68	199		8	27.625	72.375
	1.76	0.3	0.92	2.47	0.68	18	159	72	24	106	1.58	1.14	0.81	57	74.74			373.7	2.72	200		9	26.1111	73.8889
	1.74	0.29	0.93	2.45	0.66	18	162	73	23	110	1.58	1.14	0.82	58	74.1076			372.4	2.72	199		8	27.625	72.375
	1.74	0.28	0.92	2.46	0.69	19	159	72	24	108	1.57	1.11	0.81	57	74.74			373.7	2.68	200		9	26.1111	73.8889
	1.76	0.3	0.92	2.47	0.68	18	159	72	24	106	1.58	1.14	0.82	58	74.1076			372.4	2.72	199		8	27.625	72.375
	1.74	0.29	0.93	2.45	0.66	18	162	73	23	110	1.58	1.14	0.81	57	74.74			373.7	2.72	200		9	26.1111	73.8889
	1.74	0.28	0.92	2.46	0.69	19	159	72	24	108	1.57	1.11	0.83	57	74.74			373.7	2.68	200		9	26.1111	73.8889
	1.7	0.27	0.92	2.35	0.62	17	155	66	22	103	1.52	1.07	0.76	48	71.7024			369.6	2.59	194		8	25.75	74.25
	1.72	0.26	0.9	2.36	0.63	16	157	68	21	104	1.51	1.08	0.75	49	70.863			363.4	2.59	195		7	26.8571	73.1429
	1.71	0.28	0.9	2.34	0.64	17	158	66	22	102	1.51	1.06	0.74	47	71.4675			366.5	2.57	195		9	23.5556	76.4444
	1.72	0.26	0.9	2.33	0.62	17	156	68	21	105	1.53	1.08	0.74	48	71.442			364.5	2.61	196		8	25.75	74.25
	1.71	0.28	0.9	2.34	0.64	17	158	66	22	102	1.51	1.06	0.75	49	70.863			363.4	2.57	195		7	26.8571	73.1429
	1.72	0.26	0.9	2.33	0.62	17	156	68	21	105	1.53	1.08	0.74	47	71.4675			366.5	2.61	195		9	23.5556	76.4444
	1.71	0.28	0.9	2.34	0.64	17	158	66	22	102	1.51	1.06	0.74	48	71.442			364.5	2.57	196		8	25.75	74.25
	1.72	0.26	0.9	2.33	0.62	17	156	68	21	105	1.53	1.08	0.74	47	71.4675			366.5	2.61	195		9	23.5556	76.4444
	1.71	0.28	0.9	2.34	0.64	17	158	66	22	102	1.51	1.07	0.74	48	71.442			364.5	2.58	196		8	25.75	74.25
	1.63	0.22	0.85	2.27	0.55	14	148	58	17	94	1.44	1	0.67	44	68.2944			355.7	2.44	192		6	22.6667	77.3333
	1.64	0.21	0.86	2.28	0.54	15	148	58	18	95	1.46	1.01	0.66	44	68.8506			354.9	2.47	194		8	22.375	77.625
	1.62	0.21	0.85	2.29	0.54	13	145	59	19	96	1.46	1.01	0.68	43	68.0915			356.5	2.47	191		7	22.5714	77.4286
	1.63	0.23	0.85	2.27	0.55	14	146	61	18	95	1.45	1	0.67	43	69.1905			358.5	2.45	193		8	22.25	77.75
	1.63	0.22	0.85	2.27	0.55	14	148	58	17	94	1.44	1	0.67	44	68.2944			355.7	2.44	192		6	22.6667	77.3333
	1.64	0.21	0.86	2.28	0.54	15	148	58	18	95	1.46	1.01	0.66	44	68.8506			354.9	2.47	194		8	22.375	77.625
	1.62	0.21	0.85	2.29	0.54	13	145	59	19	96	1.46	1.01	0.68	43	68.0915			356.5	2.47	191		7	22.5714	77.4286
	1.63	0.23	0.85	2.27	0.55	14	146	61	18	95	1.45	1	0.67	43	69.1905			358.5	2.45	193		8	22.25	77.75
	1.62	0.21	0.85	2.29	0.54	13	145	59	19	96	1.46	1.01	0.68	43	68.0915			356.5	2.47	191		7	22.5714	77.4286
	1.43	0.15	0.68	2.08	0.31	10	127	36	13	76	1.27	0.78	0.51	28	60.372			335.4	2.05	180		6	18.6667	81.3333
	1.44	0.17	0.69	2.06	0.32	9	128	36	13	73	1.28	0.76	0.51	27	61.3704			337.2	2.04	182		6	18.1667	81.8333
	1.43	0.16	0.68	2.04	0.31	10	125	38	12	75	1.26	0.76	0.52	29	60.1282			332.2	2.02	181		6	18.1667	81.8333
	1.42	0.17	0.68	2.08	0.31	10	124	36	12	74	1.26	0.78	0.52	28	60.5364			330.8	2.04	183		5	19.2	80.8
	1.44	0.17	0.69	2.06	0.32	9	128	36	13	73	1.28	0.76	0.51	28	60.372			335.4	2.04	180		6	18.6667	81.3333
	1.43	0.16	0.68	2.04	0.31	10	125	38	12	75	1.26	0.76	0.51	27	61.3704			337.2	2.02	182		6	18.1667	81.8333
	1.42	0.17	0.68	2.08	0.31	10	124	36	12	74	1.26	0.78	0.52	29	60.1282			332.2	2.04	181		6	18.1667	81.8333
	1.43	0.16	0.68	2.04	0.31	10	125	38	12	75	1.26	0.76	0.52	28	60.5364			330.8	2.02	183		5	19.2	80.8
	1.42	0.17	0.68	2.08	0.31	10	124	36	12	74	1.26	0.78	0.52	28	60.5364			330.8	2.04	183		5	19.2	80.8
	1.55	0.2	0.82	2.18	0.48	13	141	52	16	89	1.38	0.94	0.62	37	64.8768			348.8	2.32	186		6	20.3333	79.6667
	1.58	0.21	0.81	2.22	0.46	12	140	51	16	91	1.37	0.95	0.63	38	65.6684			349.3	2.32	188		7	20.2857	79.7143
	1.57	0.19	0.81	2.21	0.48	13	142	51	17	90	1.39	0.96	0.62	38	64.084			346.4	2.35	185		6	20.3333	79.6667
	1.56	0.21	0.82	2.21	0.46	12	141	50	17	89	1.39	0.93	0.61	37	65.9175			352.5	2.32	187		8	19.5	80.5
	1.58	0.21	0.81	2.22	0.46	12	140	51	16	91	1.37	0.95	0.63	38	65.6684			349.3	2.32	188		7	20.2857	79.7143
	1.57	0.19	0.81	2.21	0.48	13	142	51	17	90	1.39	0.96	0.62	38	64.084			346.4	2.35	185		6	20.3333	79.6667
	1.56	0.21	0.82	2.21	0.46	12	141	50	17	89	1.39	0.93	0.61	37	65.9175			352.5	2.32	187		8	19.5	80.5
	1.57	0.19	0.81	2.21	0.48	13	142	51	17	90	1.39	0.96	0.62	38	64.084			346.4	2.35	185		6	20.3333	79.6667
	1.56	0.21	0.82	2.21	0.46	12	141	50	17	89	1.39	0.93	0.61	37	65.9175			352.5	2.32	187		8	19.5	80.5
	1.38	0.14	0.57	2.01	0.27	9	120	32	11	68	1.25	0.69	0.47	24	57.138			321	1.94	178		6	17.5	82.5
	1.38	0.13	0.56	2.01	0.28	8	118	31	10	67	1.22	0.69	0.47	23	57.702			326	1.91	177		5	18.4	81.6
	1.39	0.15	0.57	2	0.28	9	122	30	12	66	1.23	0.69	0.48	22	56.672			322	1.92	176		5	17.4	82.6
	1.38	0.14	0.55	2.01	0.26	9	120	31	12	69	1.23	0.68	0.47	23	55.968			318	1.91	176		5	17.2	82.8
	1.38	0.14	0.57	2.01	0.27	9	120	32	11	68	1.25	0.69	0.47	24	57.138			321	1.94	178		6	17.5	82.5
	1.38	0.13	0.56	2.01	0.28	8	118	31	10	67	1.22	0.69	0.47	23	57.702			326	1.91	177		5	18.4	81.6
	1.39	0.15	0.57	2	0.28	9	122	30	12	66	1.23	0.69	0.48	22	56.672			322	1.92	176		5	17.4	82.6
	1.38	0.14	0.55	2.01	0.26	9	120	31	12	69	1.23	0.68	0.47	23	55.968			318	1.91	176		5	17.2	82.8
	1.39	0.15	0.57	2	0.28	9	122	30	12	66	1.23	0.69	0.47	23	55.968			318	1.92	176		5	17.2	82.8
mean	1.62291	0.234276	0.79485	2.27349	0.514496	13.9544	148.874	58.1845	17.6451	88.5436	1.4781	0.938881	0.660948	46.7082	53.1297
SD	0.197512	0.0721472	0.14954	0.23247	0.180652	4.77241	22.5015	22.0456	6.15467	18.9776	0.226285	0.210254	0.15465	16.611	14.3574
Max	1.99151	0.389802	0.99	2.73	0.801572	24	195.083	98.4215	30.8796	122	1.92	1.31266	0.963675	79	76.9428
min	1.3	0.11	0.45	1.92	0.21	6	112	20	9	57	1.13	0.61	0.41	20	29.83
Kurtz	-1.04821	-1.20005	-0.425892	-1.00907	-1.30692	-1.10763	-0.811427	-1.10564	-1.14561	-1.23162	-0.880783	-1.21313	-1.08691	-0.906382	-1.24578
Sek	0.0709244	0.207033	-0.781208	0.289423	-0.0750188	0.274511	0.313185	0.0528576	0.378934	-0.0477373	0.315237	-0.00466483	0.146855	0.257194	0.0349732
CV	12.1703	30.7957	18.8135	10.2253	35.1124	34.2001	15.1145	37.8891	34.8804	21.433	15.3092	22.3941	23.3983	35.5633	27.0233
NO	162	162	162	162	162	162	162	162	162	162	162	162	162	162	162

## Sheet: Sheet1
				N	P	K	Ca	Mg	Cu	Fe	Mn	B	Zn	Chla	Chlb	Total Chl	Carotenoids	Carbohydrate	Fruit set	F. retention	F. drop	No.fruit	F.weight	yield kg
	TR		R	Y1	Y2	Y3	Y4	Y5	Y6	Y7	Y8	Y9	Y10	Y11	Y12	Y13	Y14	Y15	Y16	Y17	Y18	Y19	Y20	Y21/tree
Orchard 2-1	TR2	1Season	R1	1.99	0.35	0.98	2.73	0.78	22	194	98	30	120	1.89	1.3	3.19	0.96	78	9	26	74	132	395	52.14
Orchard 2-1	TR2	1Season	R2	1.98	0.36	0.99	2.72	0.79	22	188	96	28	119	1.91	1.3	3.21	0.95	79	9	25.1111	74.8889	134	390	52.26
Orchard 2-1	TR2	1Season	R3	1.98	0.37	0.98	2.7	0.79	24	192	98	28	122	1.92	1.28	3.2	0.94	77	10	23.1	76.9	130	399	51.87
Orchard 2-1	TR2	1Season	R4	1.97	0.34	0.98	2.71	0.78	23	194	97	29	119	1.92	1.27	3.19	0.94	78	9	25	75	133	392	52.136
Orchard 2-1	TR2	1Season	R5	1.9747	0.35185	0.988819	2.70733	0.79405	21.3393	189.761	98.4215	30.1232	120.012	1.90828	1.31093	3.21921	0.94686	78.5564	9.54723	25.982	75.5816	131.522	397.528	52.2838
Orchard 2-1	TR2	1Season	R6	1.98437	0.361239	0.984374	2.69543	0.794064	23.9853	194.831	97.2069	30.8796	119.571	1.91237	1.28537	3.19774	0.94758	77.3353	9.26486	23.7977	74.0526	130.482	397.442	51.8591
Orchard 2-1	TR2	1Season	R7	1.9846	0.370298	0.977756	2.71852	0.788089	23.6007	193.6	96.5692	28.0131	121.279	1.89765	1.29573	3.19339	0.957434	78.5873	8.79417	21.3506	73.7607	131.564	388.842	51.1577
Orchard 2-1	TR2	1Season	R8	1.99151	0.339592	0.972336	2.6979	0.790544	22.0872	195.083	96.1418	27.9854	117.917	1.91327	1.31266	3.22592	0.963675	75.8034	9.68228	23.8452	74.2921	132.68	387.184	51.3713
Orchard 2-1	TR2	1Season	R9	1.97583	0.389802	0.972473	2.71597	0.801572	23.5974	192.244	96.5523	29.5001	121.282	1.91099	1.27408	3.18507	0.937963	76.4475	9.03873	23.8975	74.7069	132.5	394.203	52.232
			Mean	1.98122	0.359198	0.98064	2.71057	0.789813	22.8455	192.613	97.0991	29.0557	120.007	1.90917	1.29209	3.20126	0.949279	77.6367	9.25859	24.2316	74.7981	131.972	393.466	51.9233
			SD	0.00711249	0.0160968	0.00626159	0.0115713	0.00680499	1.00405	2.39178	0.873053	1.11915	1.31343	0.00978896	0.0154923	0.0141353	0.00934204	1.06907	0.39956	1.48261	0.975585	1.2463	4.19586	0.407515
Orchard 3-1	TR3	1Season	R1	1.55	0.21	0.82	2.18	0.49	13	148	57	14	81	1.48	0.85	2.33	0.63	45	5	18.8	81.2	108	348	37.584
Orchard 3-1	TR3	1Season	R2	1.59	0.22	0.81	2.22	0.48	12	147	58	14	81	1.47	0.87	2.34	0.63	46	6	18.6667	81.3333	106	346	36.676
Orchard 3-1	TR3	1Season	R3	1.6	0.22	0.81	2.21	0.48	13	147	59	15	80	1.49	0.84	2.33	0.62	46	6	19	81	105	347	36.435
Orchard 3-1	TR3	1Season	R4	1.6	0.24	0.82	2.21	0.47	13	149	57	15	82	1.49	0.88	2.37	0.62	45	5	18.4	81.6	107	348	37.236
Orchard 3-1	TR3	1Season	R5	1.56	0.23	0.82	2.18	0.49	12	148	57	14	81	1.47	0.85	2.32	0.63	45	5	18.8	81.2	108	348	37.584
Orchard 3-1	TR3	1Season	R6	1.57	0.21	0.81	2.22	0.47	12	147	59	13	80	1.48	0.87	2.35	0.63	45	6	18.8667	81.3333	109	346	37.714
Orchard 3-1	TR3	1Season	R7	1.62	0.22	0.81	2.24	0.49	11	146	60	15	82	1.46	0.85	2.31	0.62	47	6	19	81.8	105	346	36.33
Orchard 3-1	TR3	1Season	R8	1.61	0.23	0.8	2.23	0.47	12	147	57	14	81	1.5	0.89	2.39	0.62	45	5	18.5	81.65	108	349	37.692
Orchard 3-1	TR3	1Season	R9	1.59	0.24	0.79	2.19	0.5	13	149	58	15	81	1.48	0.85	2.33	0.61	47	6	18.48	81.71	107	350	37.45
			Mean	1.58778	0.224444	0.81	2.20889	0.482222	12.3333	147.556	58	14.3333	81	1.48	0.861111	2.34111	0.623333	45.6667	5.55556	18.7237	81.4252	107	347.556	37.189
			SD	0.0233333	0.0113039	0.01	0.0214735	0.0109291	0.707107	1.01379	1.11803	0.707107	0.707107	0.0122474	0.0169148	0.0252212	0.00707107	0.866025	0.527046	0.22423	0.274267	1.41421	1.424	0.556842
Orchard 4-1	TR4	1Season	R1	1.32	0.17	0.57	1.98	0.28	7	122	28	10	58	1.16	0.61	1.77	0.45	32	4	16	84	97	319	30.943
Orchard 4-1	TR4	1Season	R2	1.35	0.16	0.56	1.96	0.27	8	123	29	9	60	1.15	0.62	1.77	0.44	33	3	16	84	96	315	30.24
Orchard 4-1	TR4	1Season	R3	1.35	0.16	0.55	1.94	0.26	7	124	31	9	59	1.13	0.61	1.74	0.45	31	4	15.5	84.5	95	314	29.83
Orchard 4-1	TR4	1Season	R4	1.32	0.15	0.55	1.94	0.26	8	125	28	10	58	1.14	0.62	1.76	0.44	32	4	16.5	83.5	96	318	30.528
Orchard 4-1	TR4	1Season	R5	1.32	0.17	0.57	1.98	0.28	7	122	28	10	58	1.16	0.61	1.77	0.45	32	4	16	84	97	319	30.943
Orchard 4-1	TR4	1Season	R6	1.35	0.16	0.56	1.96	0.27	8	123	29	9	60	1.15	0.62	1.77	0.44	33	3	16	84	96	315	30.24
Orchard 4-1	TR4	1Season	R7	1.32	0.16	0.57	1.94	0.26	7	126	30	11	59	1.15	0.61	1.76	0.45	31	4	15.5	84.5	95	314	29.83
Orchard 4-1	TR4	1Season	R8	1.33	0.17	0.55	1.95	0.29	6	125	28	10	60	1.14	0.61	1.75	0.44	32	4	16.5	83.5	96	318	30.528
Orchard 4-1	TR4	1Season	R9	1.35	0.18	0.58	1.97	0.28	7	122	31	10	60	1.15	0.62	1.77	0.44	33	3	16	84	96	315	30.24
			Mean	1.33444	0.164444	0.562222	1.95778	0.272222	7.22222	123.556	29.1111	9.77778	59.1111	1.14778	0.614444	1.76222	0.444444	32.1111	3.66667	16	84	96	316.333	30.3691
			SD	0.0150923	0.00881917	0.0109291	0.0164148	0.0109291	0.666667	1.50923	1.2693	0.666667	0.927961	0.00971825	0.00527046	0.0109291	0.00527046	0.781736	0.5	0.353553	0.353553	0.707107	2.12132	0.409341
Orchard 5-1	TR5	1Season	R1	1.92	0.34	0.96	2.64	0.75	20	185	90	25	112	1.85	1.22	3.07	0.87	73	8	23.5	76.5	128	388	49.664
Orchard 5-1	TR5	1Season	R2	1.92	0.33	0.95	2.65	0.76	20	186	91	26	114	1.86	1.21	3.07	0.86	74	8	23.75	76.25	126	386	48.636
Orchard 5-1	TR5	1Season	R3	1.91	0.33	0.94	2.66	0.76	21	187	92	27	114	1.87	1.23	3.1	0.85	75	8	23.75	76.25	129	380	49.02
Orchard 5-1	TR5	1Season	R4	1.9	0.34	0.94	2.62	0.75	21	186	90	26	112	1.85	1.24	3.09	0.85	74	9	23.4444	76.5556	127	385	48.895
Orchard 5-1	TR5	1Season	R5	1.92	0.33	0.95	2.65	0.76	20	186	91	26	114	1.86	1.21	3.07	0.86	74	8	23.75	76.25	126	386	48.636
Orchard 5-1	TR5	1Season	R6	1.91	0.33	0.94	2.66	0.76	21	187	92	27	114	1.87	1.23	3.1	0.85	75	8	23.75	76.25	129	380	49.02
Orchard 5-1	TR5	1Season	R7	1.9	0.34	0.94	2.62	0.75	21	186	90	26	112	1.85	1.24	3.09	0.85	74	9	23.4444	76.5556	127	385	48.895
Orchard 5-1	TR5	1Season	R8	1.9	0.34	0.94	2.62	0.75	21	186	90	26	112	1.85	1.24	3.09	0.85	75	8	23.75	76.25	129	380	49.02
Orchard 5-1	TR5	1Season	R9	1.92	0.33	0.95	2.65	0.76	20	186	91	26	114	1.86	1.21	3.07	0.85	74	9	23.4444	76.5556	127	385	48.895
			Mean	1.91111	0.334444	0.945556	2.64111	0.755556	20.5556	186.111	90.7778	26.1111	113.111	1.85778	1.22556	3.08333	0.854444	74.2222	8.33333	23.6204	76.3796	127.556	383.889	48.9646
			SD	0.00927961	0.00527046	0.00726483	0.0169148	0.00527046	0.527046	0.600925	0.833333	0.600925	1.05409	0.00833333	0.0133333	0.0132288	0.00726483	0.666667	0.5	0.15466	0.15466	1.23603	3.05959	0.301839
Orchard 6-1	TR6	1Season	R1	1.84	0.34	0.93	2.55	0.71	18	179	86	24	105	1.78	1.15	2.93	0.82	68	7	22.5714	77.4286	124	379	46.996
Orchard 6-1	TR6	1Season	R2	1.83	0.32	0.93	2.57	0.72	19	179	85	25	104	1.76	1.15	2.91	0.81	66	7	22.8571	77.1429	125	375	46.875
Orchard 6-1	TR6	1Season	R3	1.85	0.33	0.92	2.54	0.71	18	178	84	24	106	1.78	1.14	2.92	0.81	67	8	22.125	77.875	126	376	47.376
Orchard 6-1	TR6	1Season	R4	1.86	0.32	0.92	2.53	0.73	19	180	86	25	105	1.79	1.14	2.93	0.82	68	8	22.75	77.25	124	377	46.748
Orchard 6-1	TR6	1Season	R5	1.83	0.32	0.93	2.57	0.72	19	179	85	25	104	1.76	1.15	2.91	0.81	67	8	22.125	77.875	126	376	47.376
Orchard 6-1	TR6	1Season	R6	1.85	0.33	0.92	2.54	0.71	18	178	84	24	106	1.78	1.14	2.92	0.82	68	8	22.75	77.25	124	377	46.748
Orchard 6-1	TR6	1Season	R7	1.86	0.32	0.92	2.53	0.73	19	180	86	25	105	1.79	1.14	2.93	0.82	68	7	22.5714	77.4286	124	379	46.996
Orchard 6-1	TR6	1Season	R8	1.85	0.33	0.92	2.54	0.71	18	178	84	24	106	1.78	1.14	2.92	0.81	66	7	22.8571	77.1429	125	375	46.875
Orchard 6-1	TR6	1Season	R9	1.86	0.32	0.92	2.53	0.73	19	180	86	25	105	1.79	1.14	2.93	0.81	67	8	22.125	77.875	126	376	47.376
			Mean	1.84778	0.325556	0.923333	2.54444	0.718889	18.5556	179	85.1111	24.5556	105.111	1.77889	1.14333	2.92222	0.814444	67.2222	7.55556	22.5258	77.4742	124.889	376.667	47.0407
			SD	0.0120185	0.00726483	0.005	0.015899	0.00927961	0.527046	0.866025	0.927961	0.527046	0.781736	0.0116667	0.005	0.00833333	0.00527046	0.833333	0.527046	0.317449	0.317449	0.927961	1.5	0.266349
Orchard 7-1	TR7	1Season	R1	1.75	0.28	0.92	2.41	0.62	17	163	78	19	98	1.69	1.05	2.74	0.76	58	6	21	79	118	365	43.07
Orchard 7-1	TR7	1Season	R2	1.77	0.3	0.9	2.43	0.64	16	162	76	20	99	1.67	1.03	2.7	0.75	59	6	21.3333	78.6667	116	368	42.688
Orchard 7-1	TR7	1Season	R3	1.77	0.29	0.9	2.41	0.63	16	164	77	19	96	1.66	1.06	2.72	0.74	57	7	20.2857	79.7143	117	367	42.939
Orchard 7-1	TR7	1Season	R4	1.76	0.27	0.9	2.4	0.65	17	163	76	18	99	1.67	1.05	2.72	0.74	58	7	20.4286	79.5714	114	369	42.066
Orchard 7-1	TR7	1Season	R5	1.75	0.28	0.92	2.41	0.62	17	163	78	19	98	1.69	1.05	2.74	0.76	58	6	21	79	118	365	43.07
Orchard 7-1	TR7	1Season	R6	1.77	0.3	0.9	2.43	0.64	16	162	76	20	99	1.67	1.03	2.7	0.75	59	6	21.3333	78.6667	116	368	42.688
Orchard 7-1	TR7	1Season	R7	1.77	0.29	0.9	2.41	0.63	16	164	77	19	96	1.66	1.06	2.72	0.74	57	7	20.2857	79.7143	117	367	42.939
Orchard 7-1	TR7	1Season	R8	1.76	0.27	0.9	2.4	0.65	17	163	76	18	99	1.67	1.05	2.72	0.74	58	7	20.4286	79.5714	114	369	42.066
Orchard 7-1	TR7	1Season	R9	1.77	0.29	0.9	2.41	0.63	16	164	77	19	96	1.66	1.06	2.72	0.75	59	6	21.3333	78.6667	116	368	42.688
			Mean	1.76333	0.285556	0.904444	2.41222	0.634444	16.4444	163.111	76.7778	19	97.7778	1.67111	1.04889	2.72	0.747778	58.1111	6.44444	20.8254	79.1746	116.222	367.333	42.6904
			SD	0.00866025	0.0113039	0.00881917	0.0109291	0.0113039	0.527046	0.781736	0.833333	0.707107	1.39443	0.0116667	0.0116667	0.0141421	0.00833333	0.781736	0.527046	0.465353	0.465353	1.48137	1.5	0.385935
Orchard 8-1	TR8	1Season	R1	1.55	0.2	0.76	2.15	0.42	11	139	43	12	73	1.36	0.79	2.15	0.57	41	5	17.2	82.8	104	338	35.152
Orchard 8-1	TR8	1Season	R2	1.54	0.19	0.75	2.14	0.42	10	138	45	13	73	1.37	0.77	2.14	0.58	43	5	17.6	82.4	103	340	35.02
Orchard 8-1	TR8	1Season	R3	1.53	0.19	0.74	2.12	0.41	10	135	46	12	72	1.36	0.77	2.13	0.56	41	4	17	83	106	337	35.722
Orchard 8-1	TR8	1Season	R4	1.55	0.18	0.74	2.14	0.41	11	136	46	13	74	1.36	0.78	2.14	0.57	42	5	16.4	83.6	104	336	34.944
Orchard 8-1	TR8	1Season	R5	1.55	0.2	0.76	2.15	0.42	11	139	43	12	73	1.36	0.79	2.15	0.57	41	5	17.2	82.8	104	338	35.152
Orchard 8-1	TR8	1Season	R6	1.54	0.19	0.75	2.14	0.42	10	138	45	13	73	1.37	0.77	2.14	0.58	43	5	17.6	82.4	103	340	35.02
Orchard 8-1	TR8	1Season	R7	1.53	0.19	0.74	2.12	0.41	10	135	46	12	72	1.36	0.77	2.13	0.56	41	4	17	83	106	337	35.722
Orchard 8-1	TR8	1Season	R8	1.55	0.18	0.74	2.14	0.41	11	136	46	13	74	1.36	0.78	2.14	0.57	42	5	16.4	83.6	104	336	34.944
Orchard 8-1	TR8	1Season	R9	1.55	0.2	0.76	2.15	0.42	11	139	43	12	73	1.36	0.79	2.15	0.57	42	5	16.4	83.6	104	336	34.944
			Mean	1.54333	0.191111	0.748889	2.13889	0.415556	10.5556	137.222	44.7778	12.4444	73	1.36222	0.778889	2.14111	0.57	41.7778	4.77778	16.9778	83.0222	104.222	337.556	35.18
			SD	0.00866025	0.00781736	0.00927961	0.0116667	0.00527046	0.527046	1.71594	1.39443	0.527046	0.707107	0.00440959	0.00927961	0.00781736	0.00707107	0.833333	0.440959	0.484195	0.484195	1.09291	1.5899	0.317684
Orchard 9-1	TR9	1Season	R1	1.7	0.25	0.87	2.3	0.58	14	155	71	18	91	1.58	0.94	2.52	0.68	54	7	18.8571	81.1429	113	360	40.68
Orchard 9-1	TR9	1Season	R2	1.7	0.25	0.86	2.28	0.57	15	158	69	16	91	1.57	0.95	2.52	0.69	53	5	20.4	79.6	113	358	40.454
Orchard 9-1	TR9	1Season	R3	1.69	0.26	0.85	2.29	0.58	15	155	70	17	90	1.56	0.96	2.52	0.68	52	6	19.6667	80.3333	112	356	39.872
Orchard 9-1	TR9	1Season	R4	1.68	0.26	0.85	2.3	0.59	14	156	69	17	89	1.59	0.94	2.53	0.68	52	6	20.3333	79.6667	110	363	39.93
Orchard 9-1	TR9	1Season	R5	1.7	0.25	0.87	2.3	0.58	14	155	71	18	91	1.58	0.94	2.52	0.68	54	7	18.8571	81.1429	113	360	40.68
Orchard 9-1	TR9	1Season	R6	1.7	0.25	0.86	2.28	0.57	15	158	69	16	91	1.57	0.95	2.52	0.69	53	5	20.4	79.6	113	358	40.454
Orchard 9-1	TR9	1Season	R7	1.69	0.26	0.85	2.29	0.58	15	155	70	17	90	1.56	0.96	2.52	0.68	52	6	19.6667	80.3333	112	356	39.872
Orchard 9-1	TR9	1Season	R8	1.68	0.26	0.85	2.3	0.59	14	156	69	17	89	1.59	0.94	2.53	0.68	52	6	20.3333	79.6667	110	363	39.93
Orchard 9-1	TR9	1Season	R9	1.68	0.26	0.85	2.3	0.59	14	156	69	17	89	1.59	0.98	2.57	0.68	52	6	19.6667	80.3333	112	356	39.872
			Mean	1.69111	0.255556	0.856667	2.29333	0.581111	14.4444	156	69.6667	17	90.1111	1.57667	0.951111	2.52778	0.682222	52.6667	6	19.7979	80.2021	112	358.889	40.1938
			SD	0.00927961	0.00527046	0.00866025	0.00866025	0.00781736	0.527046	1.22474	0.866025	0.707107	0.927961	0.0122474	0.0136423	0.0164148	0.00440959	0.866025	0.707107	0.624514	0.624514	1.22474	2.80377	0.363668
Orchard 10-1	TR10	1Season	R1	1.42	0.16	0.68	2.08	0.36	9	130	39	11	66	1.29	0.69	1.98	0.52	38	4	16.5	83.5	100	330	33
Orchard 10-1	TR10	1Season	R2	1.43	0.17	0.69	2.06	0.38	9	131	38	10	67	1.28	0.68	1.96	0.53	37	4	15.5	84.5	101	328	33.128
Orchard 10-1	TR10	1Season	R3	1.42	0.17	0.68	2.02	0.38	8	129	37	12	66	1.27	0.69	1.96	0.51	37	5	16.4	83.6	100	330	33
Orchard 10-1	TR10	1Season	R4	1.41	0.18	0.68	2.04	0.36	9	131	39	12	67	1.28	0.68	1.96	0.52	38	5	16.8	83.2	102	332	33.864
Orchard 10-1	TR10	1Season	R5	1.42	0.16	0.68	2.08	0.36	9	130	39	11	66	1.29	0.69	1.98	0.52	38	4	16.5	83.5	100	330	33
Orchard 10-1	TR10	1Season	R6	1.43	0.17	0.69	2.06	0.38	9	131	38	10	67	1.28	0.68	1.96	0.53	37	4	15.5	84.5	101	328	33.128
Orchard 10-1	TR10	1Season	R7	1.42	0.17	0.68	2.07	0.38	8	129	37	12	66	1.27	0.69	1.96	0.51	37	5	16.4	83.6	100	330	33
Orchard 10-1	TR10	1Season	R8	1.41	0.18	0.68	2.04	0.36	9	131	39	12	67	1.28	0.68	1.96	0.52	38	5	16.8	83.2	102	332	33.864
Orchard 10-1	TR10	1Season	R9	1.42	0.17	0.68	2.02	0.39	8	131	37	12	66	1.27	0.68	1.95	0.54	38	5	16.8	83.2	102	332	33.864
			Mean	1.42	0.17	0.682222	2.05222	0.372222	8.66667	130.333	38.1111	11.3333	66.4444	1.27889	0.684444	1.96333	0.522222	37.5556	4.55556	16.3556	83.6444	100.889	330.222	33.3164
			SD	0.00707107	0.00707107	0.00440959	0.0233333	0.0120185	0.5	0.866025	0.927961	0.866025	0.527046	0.00781736	0.00527046	0.01	0.00971825	0.527046	0.527046	0.512619	0.512619	0.927961	1.56347	0.413978
				N	P	K	Ca	Mg	Cu	Fe	Mn	B	Zn	Chla	Chlb	Total Chl	Carotenoids	Carbohydrate	Fruit set	F. retention	F. drop	No.fruit	F.weight	yield kg
	TR		R	Y1	Y2	Y3	Y4	Y5	Y6	Y7	Y8	Y9	Y10	Y11	Y12	Y13	Y14	Y15	Y16	Y17	Y18	Y19	Y20	Y21
Orchard 2-1	TR2	2Season	R1	1.84	0.32	0.95	2.55	0.75	21	165	75	26	114	1.64	1.18	2.82	0.86	64	10	27.2	72.8	198	383.7	75.9726
Orchard 2-1	TR2	2Season	R2	1.82	0.33	0.96	2.57	0.73	21	167	76	27	112	1.62	1.19	2.81	0.88	63	9	29.3333	70.6667	202	380.6	76.8812
Orchard 2-1	TR2	2Season	R3	1.85	0.33	0.95	2.54	0.72	20	168	78	27	110	1.64	1.22	2.86	0.86	64	11	26.2727	73.7273	199	378.3	75.2817
Orchard 2-1	TR2	2Season	R4	1.83	0.32	0.95	2.53	0.75	20	166	76	26	112	1.65	1.23	2.88	0.85	63	10	27.6	72.4	201	382.8	76.9428
Orchard 2-1	TR2	2Season	R5	1.84	0.32	0.95	2.55	0.75	21	165	75	26	114	1.64	1.18	2.82	0.86	64	10	27.2	72.8	198	383.7	75.9726
Orchard 2-1	TR2	2Season	R6	1.82	0.33	0.96	2.57	0.73	21	167	76	27	112	1.62	1.19	2.81	0.88	63	9	29.3333	70.6667	202	380.6	76.8812
Orchard 2-1	TR2	2Season	R7	1.85	0.33	0.95	2.54	0.72	20	168	78	27	110	1.64	1.22	2.86	0.86	64	11	26.2727	73.7273	199	378.3	75.2817
Orchard 2-1	TR2	2Season	R8	1.83	0.32	0.95	2.53	0.75	20	166	76	26	112	1.65	1.23	2.88	0.85	63	10	27.6	72.4	201	382.8	76.9428
Orchard 2-1	TR2	2Season	R9	1.85	0.33	0.95	2.54	0.72	20	168	78	27	110	1.64	1.22	2.86	0.89	64	11	26.2727	73.7273	199	378.3	75.2817
			Mean	1.83667	0.325556	0.952222	2.54667	0.735556	20.4444	166.667	76.4444	26.5556	111.778	1.63778	1.20667	2.84444	0.865556	63.5556	10.1111	27.4539	72.5461	199.889	381.011	76.1598
			SD	0.0122474	0.00527046	0.00440959	0.015	0.01424	0.527046	1.22474	1.23603	0.527046	1.56347	0.0109291	0.0212132	0.0292024	0.01424	0.527046	0.781736	1.19487	1.19487	1.61589	2.3251	0.762421
Orchard 3-1	TR3	2Season	R1	1.53	0.18	0.76	2.15	0.39	11	133	44	14	80	1.32	0.85	2.17	0.57	32	6	19	81	184	342.8	63.0752
Orchard 3-1	TR3	2Season	R2	1.52	0.17	0.75	2.14	0.38	12	136	45	13	81	1.33	0.87	2.2	0.58	33	6	19.6667	80.3333	186	343.4	63.8724
Orchard 3-1	TR3	2Season	R3	1.53	0.18	0.74	2.12	0.38	11	134	43	14	78	1.34	0.86	2.2	0.56	32	6	19.3333	80.6667	182	341.6	62.1712
Orchard 3-1	TR3	2Season	R4	1.51	0.17	0.74	2.14	0.39	11	134	44	15	82	1.32	0.87	2.19	0.57	33	7	18.2857	81.7143	185	338.8	62.678
Orchard 3-1	TR3	2Season	R5	1.53	0.18	0.76	2.15	0.39	11	133	44	14	80	1.32	0.85	2.17	0.58	33	6	19.6667	80.3333	186	343.4	63.8724
Orchard 3-1	TR3	2Season	R6	1.52	0.17	0.75	2.14	0.38	12	136	45	13	81	1.33	0.87	2.2	0.56	32	6	19.3333	80.6667	182	341.6	62.1712
Orchard 3-1	TR3	2Season	R7	1.53	0.18	0.74	2.12	0.38	11	134	43	14	78	1.34	0.86	2.2	0.57	33	7	18.2857	81.7143	185	338.8	62.678
Orchard 3-1	TR3	2Season	R8	1.51	0.17	0.74	2.14	0.39	11	134	44	15	82	1.32	0.87	2.19	0.57	33	7	18.2857	81.7143	185	338.8	62.678
Orchard 3-1	TR3	2Season	R9	1.53	0.18	0.74	2.12	0.38	11	134	43	14	78	1.34	0.86	2.2	0.57	33	7	18.2857	81.7143	185	338.8	62.678
			Mean	1.52333	0.175556	0.746667	2.13556	0.384444	11.2222	134.222	43.8889	14	80	1.32889	0.862222	2.19111	0.57	32.6667	6.44444	18.9048	81.0952	184.444	340.889	62.8749
			SD	0.00866025	0.00527046	0.00866025	0.0123603	0.00527046	0.440959	1.09291	0.781736	0.707107	1.65831	0.00927961	0.00833333	0.012693	0.00707107	0.5	0.527046	0.619505	0.619505	1.50923	2.08353	0.63004
Orchard 4-1	TR4	2Season	R1	1.3	0.12	0.45	1.92	0.22	8	112	20	9	58	1.16	0.63	1.79	0.41	20	4	17	83	173	312.2	54.0106
Orchard 4-1	TR4	2Season	R2	1.31	0.11	0.46	1.93	0.22	8	113	21	9	60	1.14	0.62	1.76	0.41	21	5	16.8	83.2	172	313.2	53.8704
Orchard 4-1	TR4	2Season	R3	1.31	0.13	0.46	1.93	0.21	7	112	22	10	57	1.15	0.63	1.78	0.42	20	5	16	84	171	309.2	52.8732
Orchard 4-1	TR4	2Season	R4	1.3	0.12	0.45	1.92	0.21	8	114	20	10	59	1.14	0.62	1.76	0.42	20	5	16.4	83.6	173	314.2	54.3566
Orchard 4-1	TR4	2Season	R5	1.31	0.11	0.46	1.93	0.22	8	113	21	9	60	1.14	0.62	1.76	0.41	21	5	16.8	83.2	172	313.2	53.8704
Orchard 4-1	TR4	2Season	R6	1.31	0.13	0.46	1.93	0.21	7	112	22	10	57	1.15	0.63	1.78	0.42	20	5	16	84	171	309.2	52.8732
Orchard 4-1	TR4	2Season	R7	1.3	0.12	0.45	1.92	0.21	8	114	20	10	59	1.14	0.62	1.76	0.42	20	5	16.4	83.6	173	314.2	54.3566
Orchard 4-1	TR4	2Season	R8	1.31	0.13	0.46	1.93	0.21	7	112	22	10	57	1.15	0.63	1.78	0.42	20	5	16	84	171	309.2	52.8732
Orchard 4-1	TR4	2Season	R9	1.3	0.12	0.45	1.92	0.21	8	114	20	10	59	1.14	0.62	1.76	0.42	20	5	16	84	171	309.2	52.8732
			Mean	1.30556	0.121111	0.455556	1.92556	0.213333	7.66667	112.889	20.8889	9.66667	58.4444	1.14556	0.624444	1.77	0.416667	20.2222	4.88889	16.3778	83.6222	171.889	311.533	53.5508
			SD	0.00527046	0.00781736	0.00527046	0.00527046	0.005	0.5	0.927961	0.927961	0.5	1.23603	0.00726483	0.00527046	0.0122474	0.005	0.440959	0.333333	0.405518	0.405518	0.927961	2.29129	0.66623
Orchard 5-1	TR5	2Season	R1	1.75	0.3	0.93	2.46	0.68	19	160	73	25	106	1.59	1.12	2.71	0.8	57	9	26.4444	73.5556	197	378.4	74.5448
Orchard 5-1	TR5	2Season	R2	1.74	0.29	0.93	2.45	0.66	18	162	73	23	110	1.58	1.14	2.72	0.81	58	9	26.2222	73.7778	198	376.3	74.5074
Orchard 5-1	TR5	2Season	R3	1.74	0.28	0.92	2.46	0.69	19	159	72	24	108	1.57	1.11	2.68	0.82	58	8	27.625	72.375	199	372.4	74.1076
Orchard 5-1	TR5	2Season	R4	1.76	0.3	0.92	2.47	0.68	18	159	72	24	106	1.58	1.14	2.72	0.81	57	9	26.1111	73.8889	200	373.7	74.74
Orchard 5-1	TR5	2Season	R5	1.74	0.29	0.93	2.45	0.66	18	162	73	23	110	1.58	1.14	2.72	0.82	58	8	27.625	72.375	199	372.4	74.1076
Orchard 5-1	TR5	2Season	R6	1.74	0.28	0.92	2.46	0.69	19	159	72	24	108	1.57	1.11	2.68	0.81	57	9	26.1111	73.8889	200	373.7	74.74
Orchard 5-1	TR5	2Season	R7	1.76	0.3	0.92	2.47	0.68	18	159	72	24	106	1.58	1.14	2.72	0.82	58	8	27.625	72.375	199	372.4	74.1076
Orchard 5-1	TR5	2Season	R8	1.74	0.29	0.93	2.45	0.66	18	162	73	23	110	1.58	1.14	2.72	0.81	57	9	26.1111	73.8889	200	373.7	74.74
Orchard 5-1	TR5	2Season	R9	1.74	0.28	0.92	2.46	0.69	19	159	72	24	108	1.57	1.11	2.68	0.83	57	9	26.1111	73.8889	200	373.7	74.74
			Mean	1.74556	0.29	0.924444	2.45889	0.676667	18.4444	160.111	72.4444	23.7778	108	1.57778	1.12778	2.70556	0.814444	57.4444	8.66667	26.6651	73.3349	199.111	374.078	74.4817
			SD	0.00881917	0.00866025	0.00527046	0.00781736	0.0132288	0.527046	1.45297	0.527046	0.666667	1.73205	0.00666667	0.0148137	0.0194365	0.00881917	0.527046	0.5	0.727725	0.727725	1.05409	2.01976	0.293975
Orchard 6-1	TR6	2Season	R1	1.7	0.27	0.92	2.35	0.62	17	155	66	22	103	1.52	1.07	2.59	0.76	48	8	25.75	74.25	194	369.6	71.7024
Orchard 6-1	TR6	2Season	R2	1.72	0.26	0.9	2.36	0.63	16	157	68	21	104	1.51	1.08	2.59	0.75	49	7	26.8571	73.1429	195	363.4	70.863
Orchard 6-1	TR6	2Season	R3	1.71	0.28	0.9	2.34	0.64	17	158	66	22	102	1.51	1.06	2.57	0.74	47	9	23.5556	76.4444	195	366.5	71.4675
Orchard 6-1	TR6	2Season	R4	1.72	0.26	0.9	2.33	0.62	17	156	68	21	105	1.53	1.08	2.61	0.74	48	8	25.75	74.25	196	364.5	71.442
Orchard 6-1	TR6	2Season	R5	1.71	0.28	0.9	2.34	0.64	17	158	66	22	102	1.51	1.06	2.57	0.75	49	7	26.8571	73.1429	195	363.4	70.863
Orchard 6-1	TR6	2Season	R6	1.72	0.26	0.9	2.33	0.62	17	156	68	21	105	1.53	1.08	2.61	0.74	47	9	23.5556	76.4444	195	366.5	71.4675
Orchard 6-1	TR6	2Season	R7	1.71	0.28	0.9	2.34	0.64	17	158	66	22	102	1.51	1.06	2.57	0.74	48	8	25.75	74.25	196	364.5	71.442
Orchard 6-1	TR6	2Season	R8	1.72	0.26	0.9	2.33	0.62	17	156	68	21	105	1.53	1.08	2.61	0.74	47	9	23.5556	76.4444	195	366.5	71.4675
Orchard 6-1	TR6	2Season	R9	1.71	0.28	0.9	2.34	0.64	17	158	66	22	102	1.51	1.07	2.58	0.74	48	8	25.75	74.25	196	364.5	71.442
			Mean	1.71333	0.27	0.902222	2.34	0.63	16.8889	156.889	66.8889	21.5556	103.333	1.51778	1.07111	2.58889	0.744444	47.8889	8.11111	25.2646	74.7354	195.222	365.489	71.3508
			SD	0.00707107	0.01	0.00666667	0.01	0.01	0.333333	1.16667	1.05409	0.527046	1.41421	0.00971825	0.00927961	0.0176383	0.00726483	0.781736	0.781736	1.35911	1.35911	0.666667	1.98837	0.288385
Orchard 7-1	TR7	2Season	R1	1.63	0.22	0.85	2.27	0.55	14	148	58	17	94	1.44	1	2.44	0.67	44	6	22.6667	77.3333	192	355.7	68.2944
Orchard 7-1	TR7	2Season	R2	1.64	0.21	0.86	2.28	0.54	15	148	58	18	95	1.46	1.01	2.47	0.66	44	8	22.375	77.625	194	354.9	68.8506
Orchard 7-1	TR7	2Season	R3	1.62	0.21	0.85	2.29	0.54	13	145	59	19	96	1.46	1.01	2.47	0.68	43	7	22.5714	77.4286	191	356.5	68.0915
Orchard 7-1	TR7	2Season	R4	1.63	0.23	0.85	2.27	0.55	14	146	61	18	95	1.45	1	2.45	0.67	43	8	22.25	77.75	193	358.5	69.1905
Orchard 7-1	TR7	2Season	R5	1.63	0.22	0.85	2.27	0.55	14	148	58	17	94	1.44	1	2.44	0.67	44	6	22.6667	77.3333	192	355.7	68.2944
Orchard 7-1	TR7	2Season	R6	1.64	0.21	0.86	2.28	0.54	15	148	58	18	95	1.46	1.01	2.47	0.66	44	8	22.375	77.625	194	354.9	68.8506
Orchard 7-1	TR7	2Season	R7	1.62	0.21	0.85	2.29	0.54	13	145	59	19	96	1.46	1.01	2.47	0.68	43	7	22.5714	77.4286	191	356.5	68.0915
Orchard 7-1	TR7	2Season	R8	1.63	0.23	0.85	2.27	0.55	14	146	61	18	95	1.45	1	2.45	0.67	43	8	22.25	77.75	193	358.5	69.1905
Orchard 7-1	TR7	2Season	R9	1.62	0.21	0.85	2.29	0.54	13	145	59	19	96	1.46	1.01	2.47	0.68	43	7	22.5714	77.4286	191	356.5	68.0915
			Mean	1.62889	0.216667	0.852222	2.27889	0.544444	13.8889	146.556	59	18.1111	95.1111	1.45333	1.00556	2.45889	0.671111	43.4444	7.22222	22.4775	77.5225	192.333	356.411	68.5495
			SD	0.00781736	0.00866025	0.00440959	0.00927961	0.00527046	0.781736	1.424	1.22474	0.781736	0.781736	0.00866025	0.00527046	0.0136423	0.00781736	0.527046	0.833333	0.166794	0.166794	1.22474	1.33832	0.469378
Orchard 8-1	TR8	2Season	R1	1.43	0.15	0.68	2.08	0.31	10	127	36	13	76	1.27	0.78	2.05	0.51	28	6	18.6667	81.3333	180	335.4	60.372
Orchard 8-1	TR8	2Season	R2	1.44	0.17	0.69	2.06	0.32	9	128	36	13	73	1.28	0.76	2.04	0.51	27	6	18.1667	81.8333	182	337.2	61.3704
Orchard 8-1	TR8	2Season	R3	1.43	0.16	0.68	2.04	0.31	10	125	38	12	75	1.26	0.76	2.02	0.52	29	6	18.1667	81.8333	181	332.2	60.1282
Orchard 8-1	TR8	2Season	R4	1.42	0.17	0.68	2.08	0.31	10	124	36	12	74	1.26	0.78	2.04	0.52	28	5	19.2	80.8	183	330.8	60.5364
Orchard 8-1	TR8	2Season	R5	1.44	0.17	0.69	2.06	0.32	9	128	36	13	73	1.28	0.76	2.04	0.51	28	6	18.6667	81.3333	180	335.4	60.372
Orchard 8-1	TR8	2Season	R6	1.43	0.16	0.68	2.04	0.31	10	125	38	12	75	1.26	0.76	2.02	0.51	27	6	18.1667	81.8333	182	337.2	61.3704
Orchard 8-1	TR8	2Season	R7	1.42	0.17	0.68	2.08	0.31	10	124	36	12	74	1.26	0.78	2.04	0.52	29	6	18.1667	81.8333	181	332.2	60.1282
Orchard 8-1	TR8	2Season	R8	1.43	0.16	0.68	2.04	0.31	10	125	38	12	75	1.26	0.76	2.02	0.52	28	5	19.2	80.8	183	330.8	60.5364
Orchard 8-1	TR8	2Season	R9	1.42	0.17	0.68	2.08	0.31	10	124	36	12	74	1.26	0.78	2.04	0.52	28	5	19.2	80.8	183	330.8	60.5364
			Mean	1.42889	0.164444	0.682222	2.06222	0.312222	9.77778	125.556	36.6667	12.3333	74.3333	1.26556	0.768889	2.03444	0.515556	28	5.66667	18.6222	81.3778	181.667	333.556	60.5945
			SD	0.00781736	0.00726483	0.00440959	0.0185592	0.00440959	0.440959	1.66667	1	0.5	1	0.00881917	0.0105409	0.0113039	0.00527046	0.707107	0.5	0.479004	0.479004	1.22474	2.73455	0.467447
Orchard 9-1	TR9	2Season	R1	1.55	0.2	0.82	2.18	0.48	13	141	52	16	89	1.38	0.94	2.32	0.62	37	6	20.3333	79.6667	186	348.8	64.8768
Orchard 9-1	TR9	2Season	R2	1.58	0.21	0.81	2.22	0.46	12	140	51	16	91	1.37	0.95	2.32	0.63	38	7	20.2857	79.7143	188	349.3	65.6684
Orchard 9-1	TR9	2Season	R3	1.57	0.19	0.81	2.21	0.48	13	142	51	17	90	1.39	0.96	2.35	0.62	38	6	20.3333	79.6667	185	346.4	64.084
Orchard 9-1	TR9	2Season	R4	1.56	0.21	0.82	2.21	0.46	12	141	50	17	89	1.39	0.93	2.32	0.61	37	8	19.5	80.5	187	352.5	65.9175
Orchard 9-1	TR9	2Season	R5	1.58	0.21	0.81	2.22	0.46	12	140	51	16	91	1.37	0.95	2.32	0.63	38	7	20.2857	79.7143	188	349.3	65.6684
Orchard 9-1	TR9	2Season	R6	1.57	0.19	0.81	2.21	0.48	13	142	51	17	90	1.39	0.96	2.35	0.62	38	6	20.3333	79.6667	185	346.4	64.084
Orchard 9-1	TR9	2Season	R7	1.56	0.21	0.82	2.21	0.46	12	141	50	17	89	1.39	0.93	2.32	0.61	37	8	19.5	80.5	187	352.5	65.9175
Orchard 9-1	TR9	2Season	R8	1.57	0.19	0.81	2.21	0.48	13	142	51	17	90	1.39	0.96	2.35	0.62	38	6	20.3333	79.6667	185	346.4	64.084
Orchard 9-1	TR9	2Season	R9	1.56	0.21	0.82	2.21	0.46	12	141	50	17	89	1.39	0.93	2.32	0.61	37	8	19.5	80.5	187	352.5	65.9175
			Mean	1.56667	0.202222	0.814444	2.20889	0.468889	12.4444	141.111	50.7778	16.6667	89.7778	1.38444	0.945556	2.33	0.618889	37.5556	6.88889	20.045	79.955	186.444	349.344	65.1353
			SD	0.01	0.00971825	0.00527046	0.0116667	0.0105409	0.527046	0.781736	0.666667	0.5	0.833333	0.00881917	0.0133333	0.015	0.00781736	0.527046	0.927961	0.409192	0.409192	1.23603	2.65005	0.850472
Orchard 10-1	TR10	2Season	R1	1.38	0.14	0.57	2.01	0.27	9	120	32	11	68	1.25	0.69	1.94	0.47	24	6	17.5	82.5	178	321	57.138
Orchard 10-1	TR10	2Season	R2	1.38	0.13	0.56	2.01	0.28	8	118	31	10	67	1.22	0.69	1.91	0.47	23	5	18.4	81.6	177	326	57.702
Orchard 10-1	TR10	2Season	R3	1.39	0.15	0.57	2	0.28	9	122	30	12	66	1.23	0.69	1.92	0.48	22	5	17.4	82.6	176	322	56.672
Orchard 10-1	TR10	2Season	R4	1.38	0.14	0.55	2.01	0.26	9	120	31	12	69	1.23	0.68	1.91	0.47	23	5	17.2	82.8	176	318	55.968
Orchard 10-1	TR10	2Season	R5	1.38	0.14	0.57	2.01	0.27	9	120	32	11	68	1.25	0.69	1.94	0.47	24	6	17.5	82.5	178	321	57.138
Orchard 10-1	TR10	2Season	R6	1.38	0.13	0.56	2.01	0.28	8	118	31	10	67	1.22	0.69	1.91	0.47	23	5	18.4	81.6	177	326	57.702
Orchard 10-1	TR10	2Season	R7	1.39	0.15	0.57	2	0.28	9	122	30	12	66	1.23	0.69	1.92	0.48	22	5	17.4	82.6	176	322	56.672
Orchard 10-1	TR10	2Season	R8	1.38	0.14	0.55	2.01	0.26	9	120	31	12	69	1.23	0.68	1.91	0.47	23	5	17.2	82.8	176	318	55.968
Orchard 10-1	TR10	2Season	R9	1.39	0.15	0.57	2	0.28	9	122	30	12	66	1.23	0.69	1.92	0.47	23	5	17.2	82.8	176	318	55.968
			Mean	1.38333	0.141111	0.563333	2.00667	0.273333	8.77778	120.222	30.8889	11.3333	67.3333	1.23222	0.687778	1.92	0.472222	23	5.22222	17.5778	82.4222	176.667	321.333	56.7698
			SD	0.005	0.00781736	0.00866025	0.005	0.00866025	0.440959	1.56347	0.781736	0.866025	1.22474	0.0109291	0.00440959	0.0122474	0.00440959	0.707107	0.440959	0.481606	0.481606	0.866025	3.1225	0.703288

## Sheet: Frist season
		N	P	K	Ca	Mg	Cu	Fe	Mn	B	Zn	Chla	Chlb	Total Chl	Carotenoids	Carbohydrate	Fruit set	F. retention	F. drop	No.fruit	F.weight	yield kg	Y.incrm
TR	R	Y1	Y2	Y3	Y4	Y5	Y6	Y7	Y8	Y9	Y10	Y11	Y12	Y13	Y14	Y15	Y16	Y17	Y18	Y19	Y20	Y21	Y22
TR2	R1	1.99	0.35	0.98	2.73	0.78	22	194	98	30	120	1.89	1.3	3.19	0.96	78	9	26	74	132	395	52.14	120.932
TR2	R2	1.98	0.36	0.99	2.72	0.79	22	188	96	28	119	1.91	1.3	3.21	0.95	79	9	25.1111	74.8889	134	390	52.26	109.182
TR2	R3	1.98	0.37	0.98	2.7	0.79	24	192	98	28	122	1.92	1.28	3.2	0.94	77	10	23.1	76.9	130	399	51.87	116.341
TR2	R4	1.97	0.34	0.98	2.71	0.78	23	194	97	29	119	1.92	1.27	3.19	0.94	78	9	25	75	133	392	52.136	123.185
TR3	R1	1.55	0.21	0.82	2.18	0.49	13	148	57	14	81	1.48	0.85	2.33	0.63	45	5	18.8	81.2	108	348	37.584	59.2542
TR3	R2	1.59	0.22	0.81	2.22	0.48	12	147	58	14	81	1.47	0.87	2.34	0.63	46	6	18.6667	81.3333	106	346	36.676	46.8038
TR3	R3	1.6	0.22	0.81	2.21	0.48	13	147	59	15	80	1.49	0.84	2.33	0.62	46	6	19	81	105	347	36.435	51.9645
TR3	R4	1.6	0.24	0.82	2.21	0.47	13	149	57	15	82	1.49	0.88	2.37	0.62	45	5	18.4	81.6	107	348	37.236	59.4007
TR4	R1	1.32	0.17	0.57	1.98	0.28	7	122	28	10	58	1.16	0.61	1.77	0.45	32	4	16	84	97	319	30.943	31.1144
TR4	R2	1.35	0.16	0.56	1.96	0.27	8	123	29	9	60	1.15	0.62	1.77	0.44	33	3	16	84	96	315	30.24	21.0423
TR4	R3	1.35	0.16	0.55	1.94	0.26	7	124	31	9	59	1.13	0.61	1.74	0.45	31	4	15.5	84.5	95	314	29.83	24.4161
TR4	R4	1.32	0.15	0.55	1.94	0.26	8	125	28	10	58	1.14	0.62	1.76	0.44	32	4	16.5	83.5	96	318	30.528	30.6849
TR5	R1	1.92	0.34	0.96	2.64	0.75	20	185	90	25	112	1.85	1.22	3.07	0.87	73	8	23.5	76.5	128	388	49.664	110.441
TR5	R2	1.92	0.33	0.95	2.65	0.76	20	186	91	26	114	1.86	1.21	3.07	0.86	74	8	23.75	76.25	126	386	48.636	94.6764
TR5	R3	1.91	0.33	0.94	2.66	0.76	21	187	92	27	114	1.87	1.23	3.1	0.85	75	8	23.75	76.25	129	380	49.02	104.454
TR5	R4	1.9	0.34	0.94	2.62	0.75	21	186	90	26	112	1.85	1.24	3.09	0.85	74	9	23.4444	76.5556	127	385	48.895	109.311
TR6	R1	1.84	0.34	0.93	2.55	0.71	18	179	86	24	105	1.78	1.15	2.93	0.82	68	7	22.5714	77.4286	124	379	46.996	99.1356
TR6	R2	1.83	0.32	0.93	2.57	0.72	19	179	85	25	104	1.76	1.15	2.91	0.81	66	7	22.8571	77.1429	125	375	46.875	87.6276
TR6	R3	1.85	0.33	0.92	2.54	0.71	18	178	84	24	106	1.78	1.14	2.92	0.81	67	8	22.125	77.875	126	376	47.376	97.5976
TR6	R4	1.86	0.32	0.92	2.53	0.73	19	180	86	25	105	1.79	1.14	2.93	0.82	68	8	22.75	77.25	124	377	46.748	100.12
TR7	R1	1.75	0.28	0.92	2.41	0.62	17	163	78	19	98	1.69	1.05	2.74	0.76	58	6	21	79	118	365	43.07	82.5
TR7	R2	1.77	0.3	0.9	2.43	0.64	16	162	76	20	99	1.67	1.03	2.7	0.75	59	6	21.3333	78.6667	116	368	42.688	70.8682
TR7	R3	1.77	0.29	0.9	2.41	0.63	16	164	77	19	96	1.66	1.06	2.72	0.74	57	7	20.2857	79.7143	117	367	42.939	79.0916
TR7	R4	1.76	0.27	0.9	2.4	0.65	17	163	76	18	99	1.67	1.05	2.72	0.74	58	7	20.4286	79.5714	114	369	42.066	80.0771
TR8	R1	1.55	0.2	0.76	2.15	0.42	11	139	43	12	73	1.36	0.79	2.15	0.57	41	5	17.2	82.8	104	338	35.152	48.9492
TR8	R2	1.54	0.19	0.75	2.14	0.42	10	138	45	13	73	1.37	0.77	2.14	0.58	43	5	17.6	82.4	103	340	35.02	40.1753
TR8	R3	1.53	0.19	0.74	2.12	0.41	10	135	46	12	72	1.36	0.77	2.13	0.56	41	4	17	83	106	337	35.722	48.9907
TR8	R4	1.55	0.18	0.74	2.14	0.41	11	136	46	13	74	1.36	0.78	2.14	0.57	42	5	16.4	83.6	104	336	34.944	49.589
TR9	R1	1.7	0.25	0.87	2.3	0.58	14	155	71	18	91	1.58	0.94	2.52	0.68	54	7	18.8571	81.1429	113	360	40.68	72.3729
TR9	R2	1.7	0.25	0.86	2.28	0.57	15	158	69	16	91	1.57	0.95	2.52	0.69	53	5	20.4	79.6	113	358	40.454	61.9261
TR9	R3	1.69	0.26	0.85	2.29	0.58	15	155	70	17	90	1.56	0.96	2.52	0.68	52	6	19.6667	80.3333	112	356	39.872	66.2996
TR9	R4	1.68	0.26	0.85	2.3	0.59	14	156	69	17	89	1.59	0.94	2.53	0.68	52	6	20.3333	79.6667	110	363	39.93	70.9332
TR10	R1	1.42	0.16	0.68	2.08	0.36	9	130	39	11	66	1.29	0.69	1.98	0.52	38	4	16.5	83.5	100	330	33	39.8305
TR10	R2	1.43	0.17	0.69	2.06	0.38	9	131	38	10	67	1.28	0.68	1.96	0.53	37	4	15.5	84.5	101	328	33.128	32.6022
TR10	R3	1.42	0.17	0.68	2.02	0.38	8	129	37	12	66	1.27	0.69	1.96	0.51	37	5	16.4	83.6	100	330	33	37.6376
TR10	R4	1.41	0.18	0.68	2.04	0.36	9	131	39	12	67	1.28	0.68	1.96	0.52	38	5	16.8	83.2	102	332	33.864	44.9658

## Sheet: second season
		N	P	K	Ca	Mg	Cu	Fe	Mn	B	Zn	Chla	Chlb	Total Chl	Carotenoids	Carbohydrate	Fruit set	F. retention	F. drop	No.fruit	F.weight	yield kg	Y.incrm
TR	R	Y1	Y2	Y3	Y4	Y5	Y6	Y7	Y8	Y9	Y10	Y11	Y12	Y13	Y14	Y15	Y16	Y17	Y18	Y19	Y20	Y21	Y22
TR2	R1	1.84	0.32	0.95	2.55	0.75	21	165	75	26	114	1.64	1.18	2.82	0.86	64	10	27.2	72.8	198	383.7	75.9726	72.3544
TR2	R2	1.82	0.33	0.96	2.57	0.73	21	167	76	27	112	1.62	1.19	2.81	0.88	63	9	29.3333	70.6667	202	380.6	76.8812	83.7724
TR2	R3	1.85	0.33	0.95	2.54	0.72	20	168	78	27	110	1.64	1.22	2.86	0.86	64	11	26.2727	73.7273	199	378.3	75.2817	74.6383
TR2	R4	1.83	0.32	0.95	2.53	0.75	20	166	76	26	112	1.65	1.23	2.88	0.85	63	10	27.6	72.4	201	382.8	76.9428	74.9806
TR3	R1	1.53	0.18	0.76	2.15	0.39	11	133	44	14	80	1.32	0.85	2.17	0.57	32	6	19	81	184	342.8	63.0752	43.0948
TR3	R2	1.52	0.17	0.75	2.14	0.38	12	136	45	13	81	1.33	0.87	2.2	0.58	33	6	19.6667	80.3333	186	343.4	63.8724	52.6769
TR3	R3	1.53	0.18	0.74	2.12	0.38	11	134	43	14	78	1.34	0.86	2.2	0.56	32	6	19.3333	80.6667	182	341.6	62.1712	44.2246
TR3	R4	1.51	0.17	0.74	2.14	0.39	11	134	44	15	82	1.32	0.87	2.19	0.57	33	7	18.2857	81.7143	185	338.8	62.678	42.5401
TR4	R1	1.3	0.12	0.45	1.92	0.22	8	112	20	9	58	1.16	0.63	1.79	0.41	20	4	17	83	173	312.2	54.0106	22.5305
TR4	R2	1.31	0.11	0.46	1.93	0.22	8	113	21	9	60	1.14	0.62	1.76	0.41	21	5	16.8	83.2	172	313.2	53.8704	28.7687
TR4	R3	1.31	0.13	0.46	1.93	0.21	7	112	22	10	57	1.15	0.63	1.78	0.42	20	5	16	84	171	309.2	52.8732	22.6551
TR4	R4	1.3	0.12	0.45	1.92	0.21	8	114	20	10	59	1.14	0.62	1.76	0.42	20	5	16.4	83.6	173	314.2	54.3566	23.6158
TR5	R1	1.75	0.3	0.93	2.46	0.68	19	160	73	25	106	1.59	1.12	2.71	0.8	57	9	26.4444	73.5556	197	378.4	74.5448	69.1152
TR5	R2	1.74	0.29	0.93	2.45	0.66	18	162	73	23	110	1.58	1.14	2.72	0.81	58	9	26.2222	73.7778	198	376.3	74.5074	78.0982
TR5	R3	1.74	0.28	0.92	2.46	0.69	19	159	72	24	108	1.57	1.11	2.68	0.82	58	8	27.625	72.375	199	372.4	74.1076	71.9147
TR5	R4	1.76	0.3	0.92	2.47	0.68	18	159	72	24	106	1.58	1.14	2.72	0.81	57	9	26.1111	73.8889	200	373.7	74.74	69.971
TR6	R1	1.7	0.27	0.92	2.35	0.62	17	155	66	22	103	1.52	1.07	2.59	0.76	48	8	25.75	74.25	194	369.6	71.7024	62.6668
TR6	R2	1.72	0.26	0.9	2.36	0.63	16	157	68	21	104	1.51	1.08	2.59	0.75	49	7	26.8571	73.1429	195	363.4	70.863	69.3869
TR6	R3	1.71	0.28	0.9	2.34	0.64	17	158	66	22	102	1.51	1.06	2.57	0.74	47	9	23.5556	76.4444	195	366.5	71.4675	65.7902
TR6	R4	1.72	0.26	0.9	2.33	0.62	17	156	68	21	105	1.53	1.08	2.61	0.74	48	8	25.75	74.25	196	364.5	71.442	62.4708
TR7	R1	1.63	0.22	0.85	2.27	0.55	14	148	58	17	94	1.44	1	2.44	0.67	44	6	22.6667	77.3333	192	355.7	68.2944	54.9353
TR7	R2	1.64	0.21	0.86	2.28	0.54	15	148	58	18	95	1.46	1.01	2.47	0.66	44	8	22.375	77.625	194	354.9	68.8506	64.5766
TR7	R3	1.62	0.21	0.85	2.29	0.54	13	145	59	19	96	1.46	1.01	2.47	0.68	43	7	22.5714	77.4286	191	356.5	68.0915	57.9585
TR7	R4	1.63	0.23	0.85	2.27	0.55	14	146	61	18	95	1.45	1	2.45	0.67	43	8	22.25	77.75	193	358.5	69.1905	57.3506
TR8	R1	1.43	0.15	0.68	2.08	0.31	10	127	36	13	76	1.27	0.78	2.05	0.51	28	6	18.6667	81.3333	180	335.4	60.372	36.9622
TR8	R2	1.44	0.17	0.69	2.06	0.32	9	128	36	13	73	1.28	0.76	2.04	0.51	27	6	18.1667	81.8333	182	337.2	61.3704	46.6963
TR8	R3	1.43	0.16	0.68	2.04	0.31	10	125	38	12	75	1.26	0.76	2.02	0.52	29	6	18.1667	81.8333	181	332.2	60.1282	39.4853
TR8	R4	1.42	0.17	0.68	2.08	0.31	10	124	36	12	74	1.26	0.78	2.04	0.52	28	5	19.2	80.8	183	330.8	60.5364	37.6697
TR9	R1	1.55	0.2	0.82	2.18	0.48	13	141	52	16	89	1.38	0.94	2.32	0.62	37	6	20.3333	79.6667	186	348.8	64.8768	47.182
TR9	R2	1.58	0.21	0.81	2.22	0.46	12	140	51	16	91	1.37	0.95	2.32	0.63	38	7	20.2857	79.7143	188	349.3	65.6684	56.97
TR9	R3	1.57	0.19	0.81	2.21	0.48	13	142	51	17	90	1.39	0.96	2.35	0.62	38	6	20.3333	79.6667	185	346.4	64.084	48.6619
TR9	R4	1.56	0.21	0.82	2.21	0.46	12	141	50	17	89	1.39	0.93	2.32	0.61	37	8	19.5	80.5	187	352.5	65.9175	49.9072
TR10	R1	1.38	0.14	0.57	2.01	0.27	9	120	32	11	68	1.25	0.69	1.94	0.47	24	6	17.5	82.5	178	321	57.138	29.6255
TR10	R2	1.38	0.13	0.56	2.01	0.28	8	118	31	10	67	1.22	0.69	1.91	0.47	23	5	18.4	81.6	177	326	57.702	37.9276
TR10	R3	1.39	0.15	0.57	2	0.28	9	122	30	12	66	1.23	0.69	1.92	0.48	22	5	17.4	82.6	176	322	56.672	31.4676
TR10	R4	1.38	0.14	0.55	2.01	0.26	9	120	31	12	69	1.23	0.68	1.91	0.47	23	5	17.2	82.8	176	318	55.968	27.2804
